# Supplementary material for: Synthesis and biological evaluation of novel asiatic acid derivatives with anticancer activity
Source: Royal Society of Chemistry journal article supplement (doi:10.1039/c5ra19120c), 2015-12-18

## Supplementary Information

### *Synthesis and biological evaluation of novel asiatic acid derivatives with anticancer activity*

*Bruno M. F. Gonçalves,<sup>a</sup> Jorge A. R. Salvador,<sup>a,b,\*</sup> Silvia Marín,<sup>c,d</sup> and Marta Cascante,<sup>c,d,\*</sup>*

<sup>a</sup> *Laboratory of Pharmaceutical Chemistry, Faculty of Pharmacy, University of Coimbra, 3000-548, Coimbra, Portugal. Fax: +351 239 488 503; Tel: +351 239 488 400; E-mail: salvador@ci.uc.pt*

<sup>b</sup> *Center for Neuroscience and Cell Biology, Coimbra, Portugal.*

<sup>c</sup> *Department of Biochemistry and Molecular Biology, Faculty of Biology, University of Barcelona, Diagonal 643, 08028 Barcelona, Spain, Tel.: +34-934021593*

<sup>d</sup> *Institute of Biomedicine of University of Barcelona (IBUB) and Associated Unit to CSIC, Barcelona, Spain.*

# Table of Contents

|                                                                                      |    |
|--------------------------------------------------------------------------------------|----|
| 1 NMR data for compound 4:.....                                                      | 6  |
| 1.1 <sup>1</sup> H-NMR spectrum for compound 4 recorded in CDCl <sub>3</sub> .....   | 6  |
| 1.2 <sup>13</sup> C-NMR spectrum for compound 4 recorded in CDCl <sub>3</sub> .....  | 7  |
| 1.3 DEPT135 spectrum for compound 4 recorded in CDCl <sub>3</sub> .....              | 8  |
| 2. NMR data for compound 5.....                                                      | 9  |
| 2.1 <sup>1</sup> H-NMR spectrum for compound 5 recorded in CDCl <sub>3</sub> .....   | 9  |
| 2.2 <sup>13</sup> C-NMR spectrum for compound 5 recorded in CDCl <sub>3</sub> .....  | 10 |
| 2.3 DEPT135 spectrum for compound 5 recorded in CDCl <sub>3</sub> .....              | 11 |
| 3. NMR data for compound 6.....                                                      | 12 |
| 3.1 <sup>1</sup> H-NMR spectrum for compound 6 recorded in CDCl <sub>3</sub> .....   | 12 |
| 3.2 <sup>13</sup> C-NMR spectrum for compound 6 recorded in CDCl <sub>3</sub> .....  | 13 |
| 3.3 DEPT135 spectrum for compound 6 recorded in CDCl <sub>3</sub> .....              | 14 |
| 4. NMR data for compound 7.....                                                      | 15 |
| 4.1 <sup>1</sup> H-NMR spectrum for compound 7 recorded in CDCl <sub>3</sub> .....   | 15 |
| 4.2 <sup>13</sup> C-NMR spectrum for compound 7 recorded in CDCl <sub>3</sub> .....  | 16 |
| 4.3 DEPT135 spectrum for compound 7 recorded in CDCl <sub>3</sub> .....              | 17 |
| 5. NMR data for compound 8.....                                                      | 18 |
| 5.1 <sup>1</sup> H-NMR spectrum for compound 8 recorded in CDCl <sub>3</sub> .....   | 18 |
| 5.2 <sup>13</sup> C-NMR spectrum for compound 8 recorded in CDCl <sub>3</sub> .....  | 19 |
| 5.3 DEPT135 spectrum for compound 8 recorded in CDCl <sub>3</sub> .....              | 20 |
| 6. NMR data for compound 9.....                                                      | 21 |
| 6.1 <sup>1</sup> H-NMR spectrum for compound 9 recorded in CDCl <sub>3</sub> .....   | 21 |
| 6.2 <sup>13</sup> C-NMR spectrum for compound 9 recorded in CDCl <sub>3</sub> .....  | 22 |
| 6.3 DEPT135 spectrum for compound 9 recorded in CDCl <sub>3</sub> .....              | 23 |
| 7. NMR data for compound 13.....                                                     | 24 |
| 7.1 <sup>1</sup> H-NMR spectrum for compound 13 recorded in CDCl <sub>3</sub> .....  | 24 |
| 7.2 <sup>13</sup> C-NMR spectrum for compound 13 recorded in CDCl <sub>3</sub> ..... | 25 |
| 7.3 DEPT135 spectrum for compound 13 recorded in CDCl <sub>3</sub> .....             | 26 |
| 8. NMR data for compound 14.....                                                     | 27 |
| 8.1 <sup>1</sup> H-NMR spectrum for compound 14 recorded in CDCl <sub>3</sub> .....  | 27 |
| 8.2 <sup>13</sup> C-NMR spectrum for compound 14 recorded in CDCl <sub>3</sub> ..... | 28 |

|                                                                                       |    |
|---------------------------------------------------------------------------------------|----|
| 8.3 DEPT135 spectrum for compound 14 recorded in CDCl <sub>3</sub> .....              | 29 |
| 9. NMR data for compound 15.....                                                      | 30 |
| 9.1 <sup>1</sup> H-NMR spectrum for compound 15 recorded in CDCl <sub>3</sub> .....   | 30 |
| 9.2 <sup>13</sup> C-NMR spectrum for compound 15 recorded in CDCl <sub>3</sub> .....  | 31 |
| 9.3 DEPT135 spectrum for compound 15 recorded in CDCl <sub>3</sub> .....              | 32 |
| 10. NMR data for compound 16.....                                                     | 33 |
| 10.1 <sup>1</sup> H-NMR spectrum for compound 16 recorded in CDCl <sub>3</sub> .....  | 33 |
| 10.2 <sup>13</sup> C-NMR spectrum for compound 16 recorded in CDCl <sub>3</sub> ..... | 34 |
| 10.3 DEPT135 spectrum for compound 16 recorded in CDCl <sub>3</sub> .....             | 35 |
| 11. NMR data for compound 17.....                                                     | 36 |
| 11.1 <sup>1</sup> H-NMR spectrum for compound 17 recorded in CDCl <sub>3</sub> .....  | 36 |
| 11.2 <sup>13</sup> C-NMR spectrum for compound 17 recorded in CDCl <sub>3</sub> ..... | 37 |
| 11.3 DEPT135 spectrum for compound 17 recorded in CDCl <sub>3</sub> .....             | 38 |
| 12. NMR data for compound 18.....                                                     | 39 |
| 12.1 <sup>1</sup> H-NMR spectrum for compound 18 recorded in CDCl <sub>3</sub> .....  | 39 |
| 12.2 <sup>13</sup> C-NMR spectrum for compound 18 recorded in CDCl <sub>3</sub> ..... | 40 |
| 12.3 DEPT135 spectrum for compound 18 recorded in CDCl <sub>3</sub> .....             | 41 |
| 13. NMR data for compound 19.....                                                     | 42 |
| 13.1 <sup>1</sup> H-NMR spectrum for compound 19 recorded in CDCl <sub>3</sub> .....  | 42 |
| 13.2 <sup>13</sup> C-NMR spectrum for compound 19 recorded in CDCl <sub>3</sub> ..... | 43 |
| 13.3 DEPT spectrum for compound 19 recorded in CDCl <sub>3</sub> .....                | 44 |
| 14. NMR data for compound 20.....                                                     | 45 |
| 14.1 <sup>1</sup> H-NMR spectrum for compound 20 recorded in CDCl <sub>3</sub> .....  | 45 |
| 14.2 <sup>13</sup> C-NMR spectrum for compound 20 recorded in CDCl <sub>3</sub> ..... | 46 |
| 14.3 DEPT spectrum for compound 20 recorded in CDCl <sub>3</sub> .....                | 47 |
| 15. NMR data for compound 21.....                                                     | 48 |
| 15.1 <sup>1</sup> H-NMR spectrum for compound 21 recorded in CDCl <sub>3</sub> .....  | 48 |
| 15.2 <sup>13</sup> C-NMR spectrum for compound 21 recorded in CDCl <sub>3</sub> ..... | 49 |
| 15.3 DEPT135 spectrum for compound 21 recorded in CDCl <sub>3</sub> .....             | 50 |
| 16. NMR data for compound 22.....                                                     | 51 |
| 16.1 <sup>1</sup> H-NMR spectrum for compound 22 recorded in CDCl <sub>3</sub> .....  | 51 |
| 16.2 <sup>13</sup> C-NMR spectrum for compound 22 recorded in CDCl <sub>3</sub> ..... | 52 |
| 16.3 DEPT135 spectrum for compound 22 recorded in CDCl <sub>3</sub> .....             | 53 |
| 17. NMR data for compound 23.....                                                     | 54 |
| 17.1 <sup>1</sup> H-NMR spectrum for compound 23 recorded in CDCl <sub>3</sub> .....  | 54 |

|      |                                                                                                                                                                      |    |
|------|----------------------------------------------------------------------------------------------------------------------------------------------------------------------|----|
| 17.2 | <sup>13</sup> C-NMR spectrum for compound 23 recorded in CDCl <sub>3</sub> .....                                                                                     | 55 |
| 17.3 | DEPT135 spectrum for compound 23 recorded in CDCl <sub>3</sub> .....                                                                                                 | 56 |
| 18.  | NMR data for compound 24.....                                                                                                                                        | 57 |
| 18.1 | <sup>1</sup> H-NMR spectrum for compound 24 recorded in CDCl <sub>3</sub> .....                                                                                      | 57 |
| 18.2 | <sup>13</sup> C-NMR spectrum for compound 24 recorded in CDCl <sub>3</sub> .....                                                                                     | 58 |
| 18.3 | DEPT135 spectrum for compound 24 recorded in CDCl <sub>3</sub> .....                                                                                                 | 59 |
| 19.  | NMR data for compound 25.....                                                                                                                                        | 60 |
| 19.1 | <sup>1</sup> H-NMR spectrum for compound 25 recorded in CDCl <sub>3</sub> .....                                                                                      | 60 |
| 19.2 | <sup>13</sup> C-NMR spectrum for compound 25 recorded in CDCl <sub>3</sub> .....                                                                                     | 61 |
| 19.3 | DEPT135 spectrum for compound 25 recorded in CDCl <sub>3</sub> .....                                                                                                 | 62 |
| 20.  | NMR data for compound 26.....                                                                                                                                        | 63 |
| 20.1 | <sup>1</sup> H-NMR spectrum for compound 26 recorded in CDCl <sub>3</sub> .....                                                                                      | 63 |
| 20.2 | <sup>13</sup> C-NMR spectrum for compound 26 recorded in CDCl <sub>3</sub> .....                                                                                     | 64 |
| 20.3 | DEPT135 spectrum for compound 26 recorded in CDCl <sub>3</sub> .....                                                                                                 | 65 |
| 21.  | NMR data for compound 27.....                                                                                                                                        | 66 |
| 21.1 | <sup>1</sup> H-NMR spectrum for compound 27 recorded in CDCl <sub>3</sub> .....                                                                                      | 66 |
| 21.2 | <sup>13</sup> C-NMR spectrum for compound 27 recorded in CDCl <sub>3</sub> .....                                                                                     | 67 |
| 21.3 | DEPT135 spectrum for compound 27 recorded in CDCl <sub>3</sub> .....                                                                                                 | 68 |
| 22.  | NMR data for compound 28.....                                                                                                                                        | 69 |
| 22.1 | <sup>1</sup> H-NMR spectrum for compound 28 recorded in CDCl <sub>3</sub> .....                                                                                      | 69 |
| 22.2 | <sup>13</sup> C-NMR spectrum for compound 28 recorded in CDCl <sub>3</sub> .....                                                                                     | 70 |
| 22.3 | DEPT135 spectrum for compound 28 recorded in CDCl <sub>3</sub> .....                                                                                                 | 71 |
| 23.  | NMR data for compound 29.....                                                                                                                                        | 72 |
| 23.1 | <sup>1</sup> H-NMR spectrum for compound 29 recorded in CDCl <sub>3</sub> .....                                                                                      | 72 |
| 23.2 | <sup>13</sup> C-NMR spectrum for compound 29 recorded in CDCl <sub>3</sub> .....                                                                                     | 73 |
| 23.3 | DEPT135 spectrum for compound 29 recorded in CDCl <sub>3</sub> .....                                                                                                 | 74 |
| 24.  | NMR data for compound 30.....                                                                                                                                        | 75 |
| 24.1 | <sup>1</sup> H-NMR spectrum for compound 30 recorded in CDCl <sub>3</sub> .....                                                                                      | 75 |
| 24.2 | <sup>13</sup> C-NMR spectrum for compound 30 recorded in CDCl <sub>3</sub> .....                                                                                     | 76 |
| 24.3 | DEPT135 spectrum for compound 30 recorded in CDCl <sub>3</sub> .....                                                                                                 | 77 |
| 25.1 | <sup>1</sup> H-NMR spectrum for compound 31 recorded in CDCl <sub>3</sub> .....                                                                                      | 78 |
| 25.2 | <sup>13</sup> C-NMR spectrum for compound 31 recorded in CDCl <sub>3</sub> .....                                                                                     | 79 |
| 25.3 | DEPT135 spectrum for compound 31 recorded in CDCl <sub>3</sub> .....                                                                                                 | 80 |
| 26.  | Dose-response curves of the antiproliferative effect of selected compounds (AA 1, 9, 14, 15, 24 and cisplatin) on HeLa cell line, after 72 hours of incubation ..... | 81 |

|                                               |    |
|-----------------------------------------------|----|
| 26.1 Dose-response curve of AA (1).....       | 81 |
| 26.2 Dose-response curve of compound 9 .....  | 81 |
| 26.3 Dose-response curve of compound 14 ..... | 82 |
| 26.4 Dose-response curve of compound 15 ..... | 82 |
| 26.5 Dose-response curve of compound 24 ..... | 83 |
| 26.6 Dose-response curve of Cisplatin .....   | 83 |

# 1 NMR data for compound 4:

1.1 <sup>1</sup>H-NMR spectrum for compound 4 recorded in CDCl<sub>3</sub>

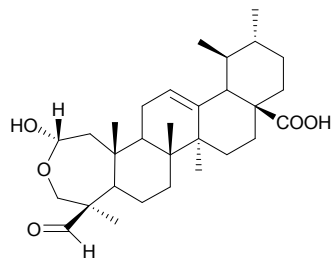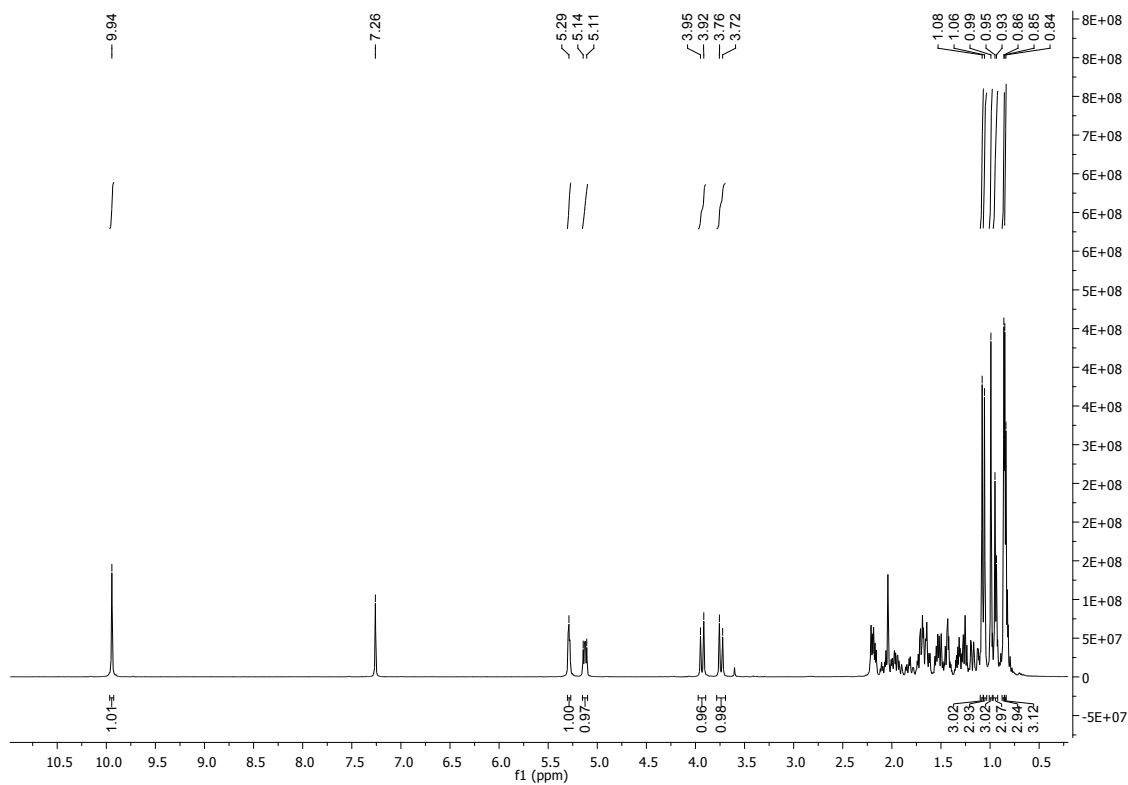

1.2  $^{13}\text{C}$ -NMR spectrum for compound 4 recorded in  $\text{CDCl}_3$

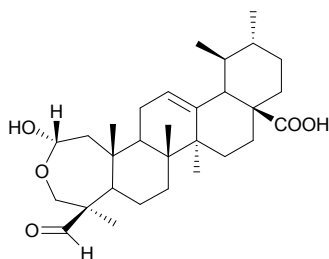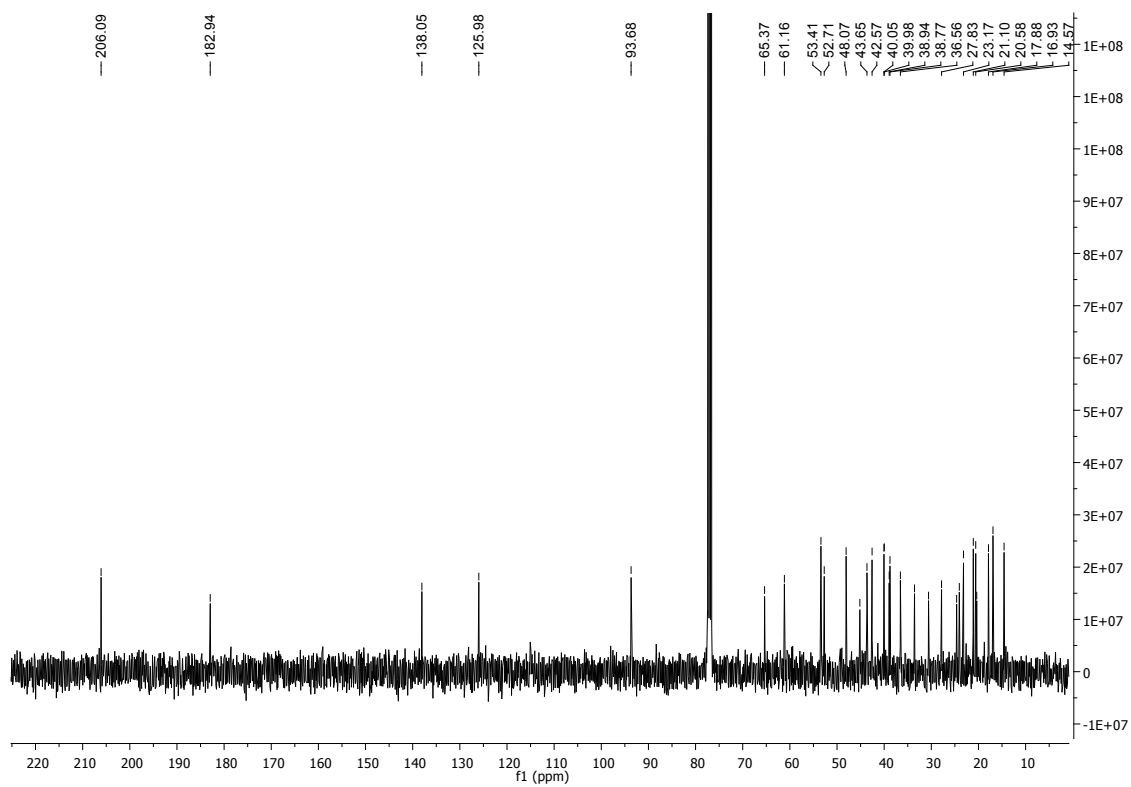

1.3 DEPT135 spectrum for compound 4 recorded in CDCl<sub>3</sub>

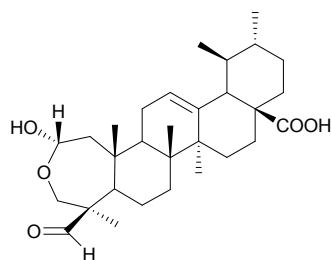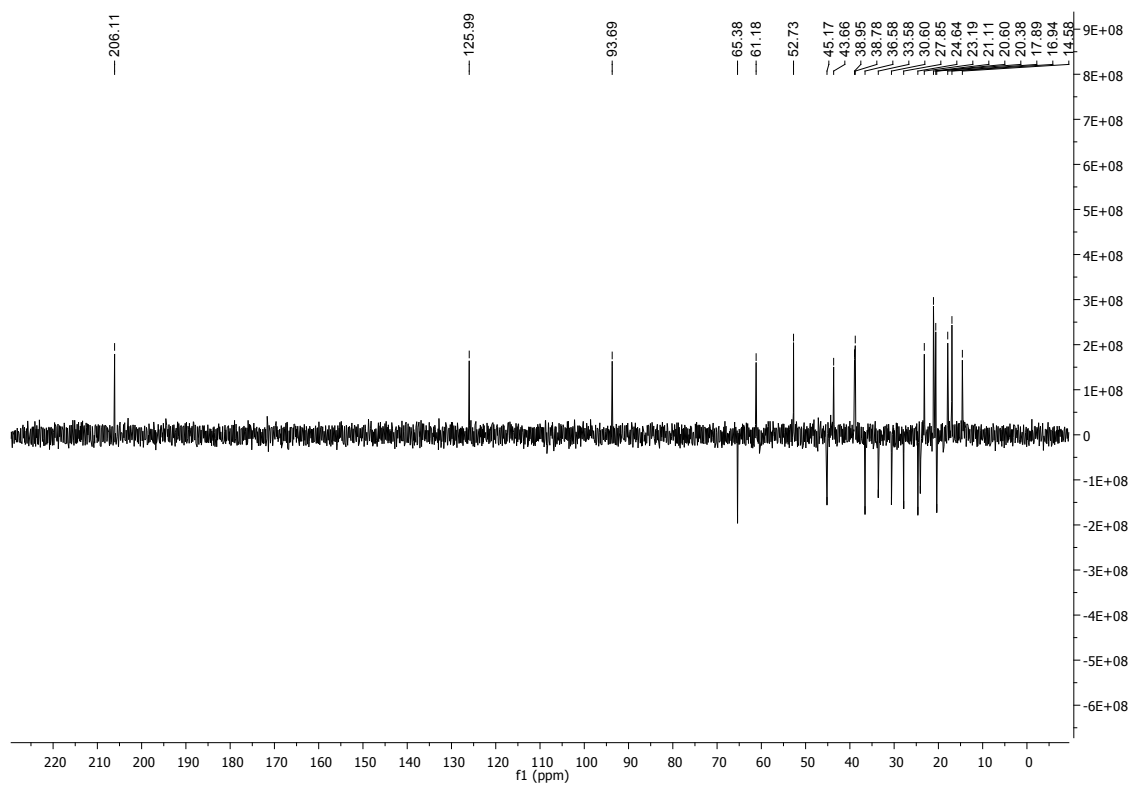



## 2. NMR data for compound 5

### 2.1 <sup>1</sup>H-NMR spectrum for compound 5 recorded in CDCl<sub>3</sub>

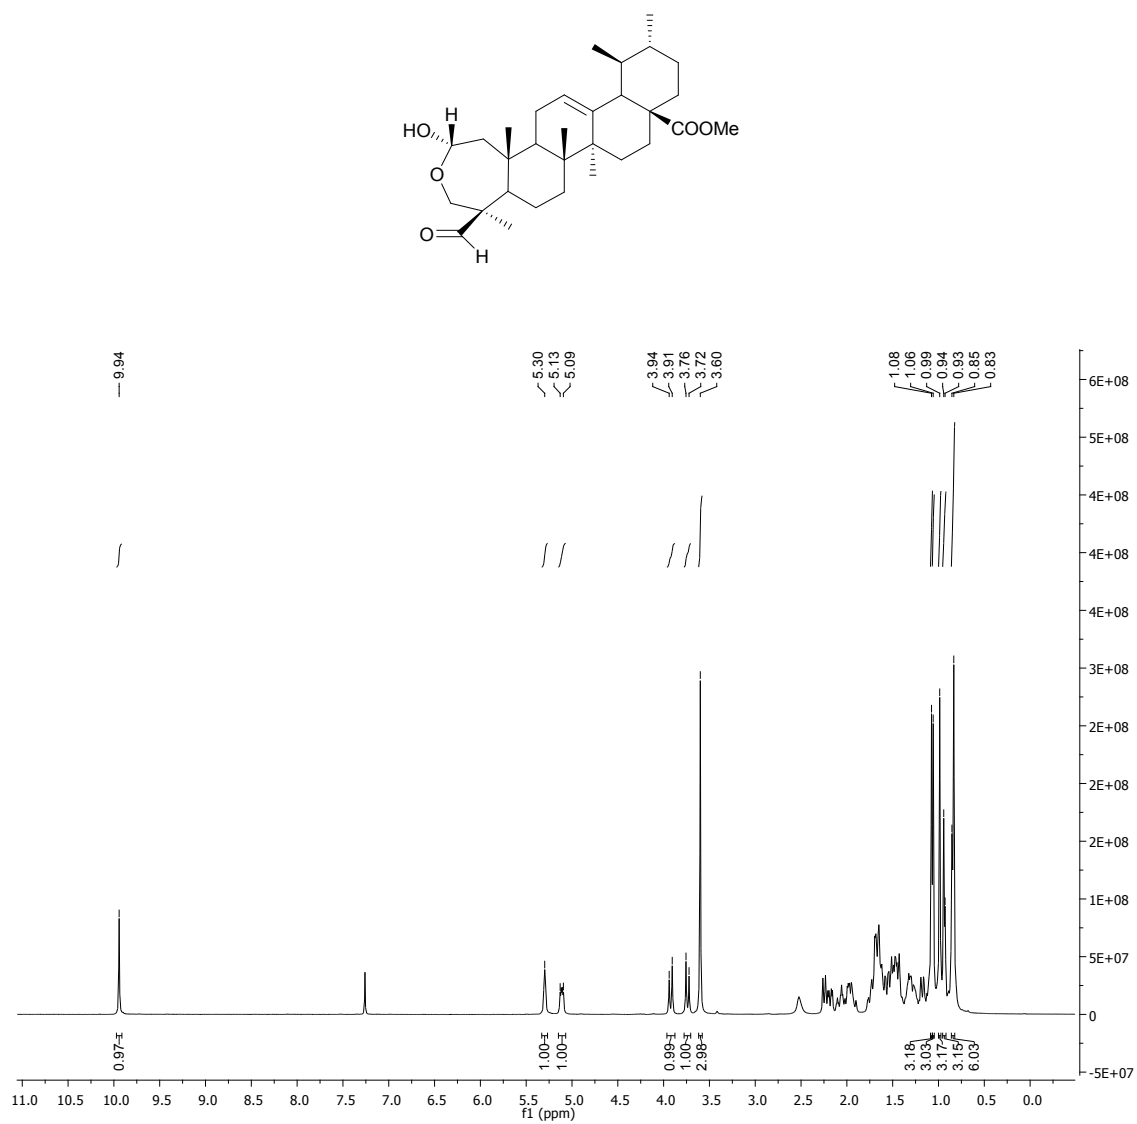

2.2  $^{13}\text{C}$ -NMR spectrum for compound 5 recorded in  $\text{CDCl}_3$

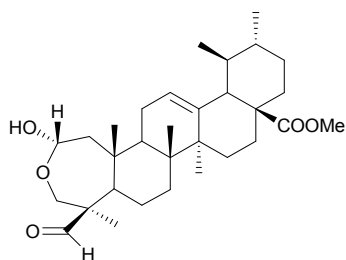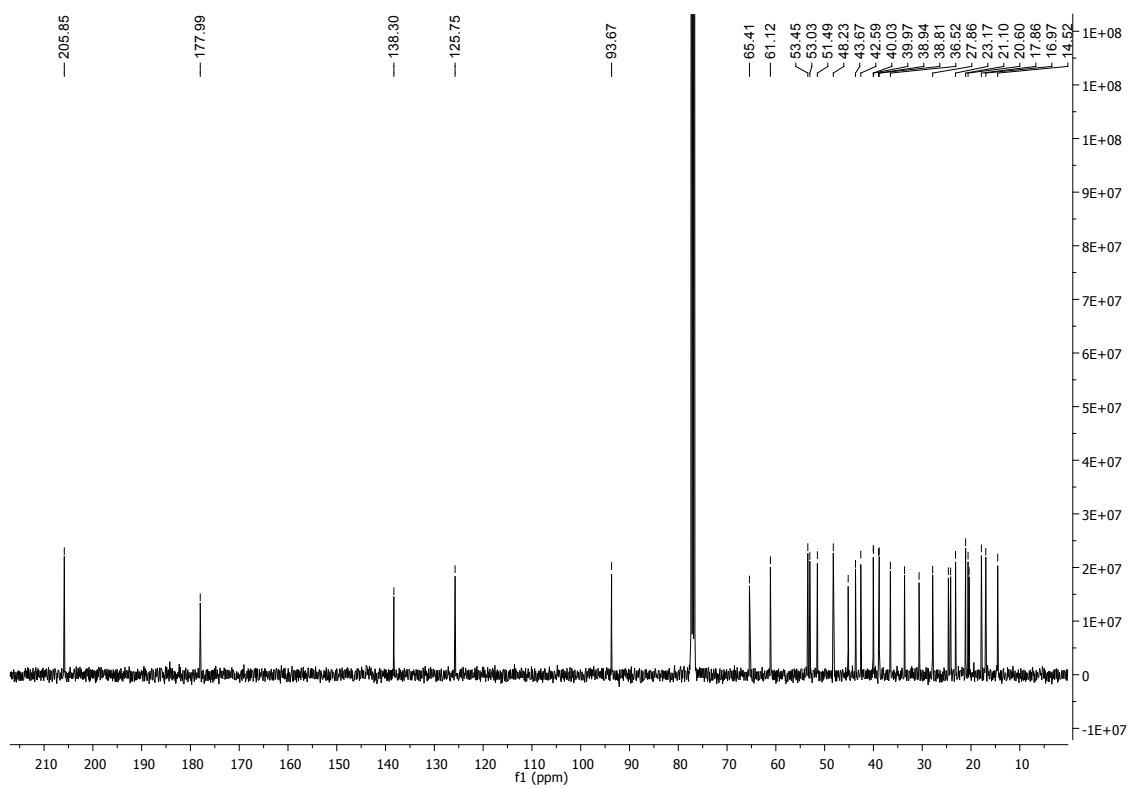

2.3 DEPT135 spectrum for compound 5 recorded in CDCl<sub>3</sub>

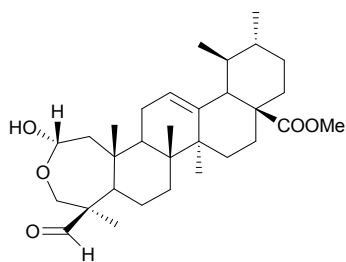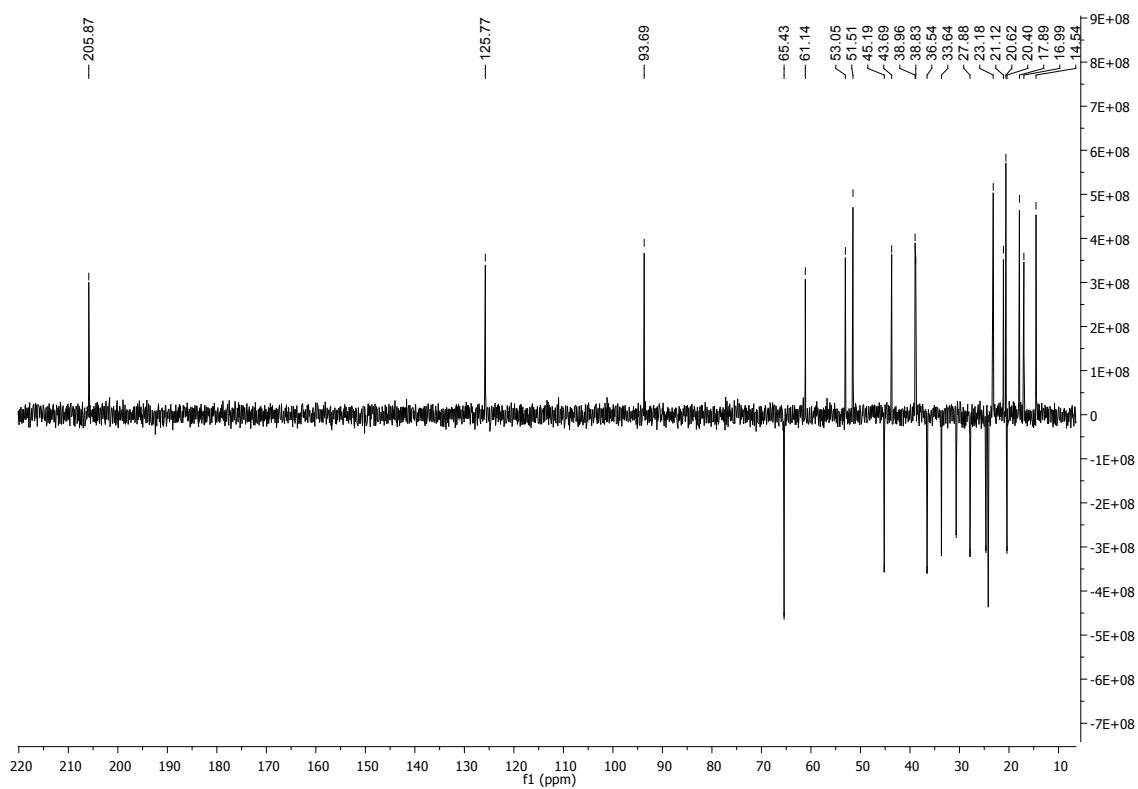

### 3. NMR data for compound 6

#### 3.1 <sup>1</sup>H-NMR spectrum for compound 6 recorded in CDCl<sub>3</sub>

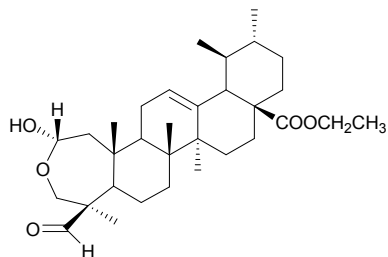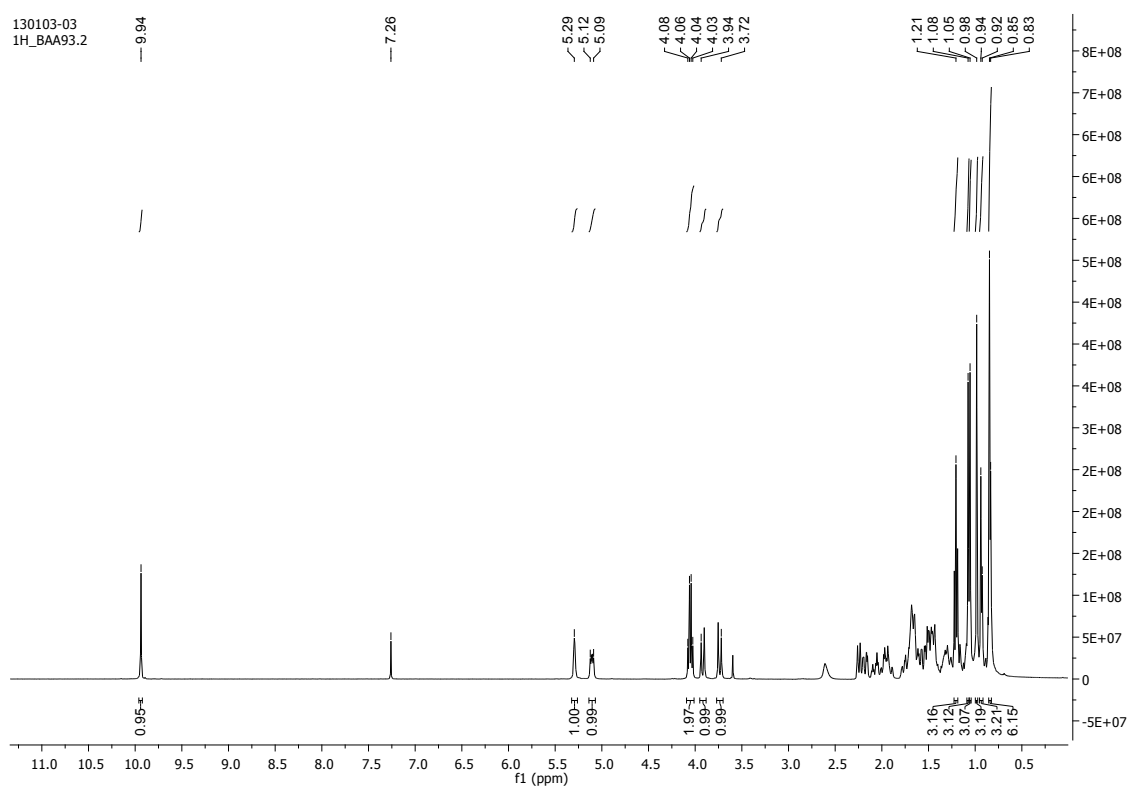

3.2  $^{13}\text{C}$ -NMR spectrum for compound 6 recorded in  $\text{CDCl}_3$

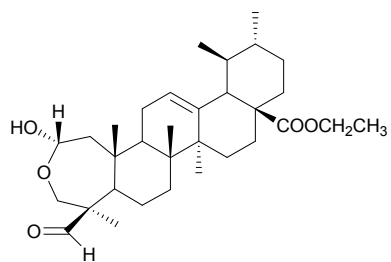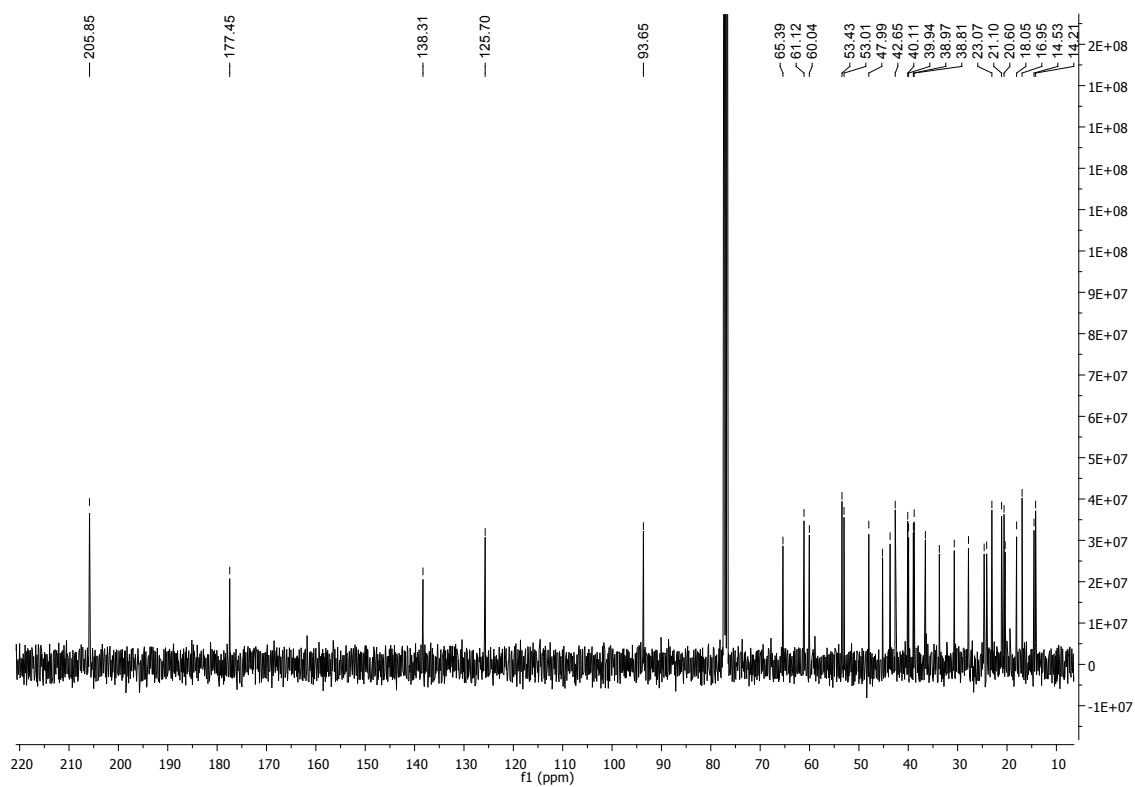

3.3 DEPT135 spectrum for compound 6 recorded in CDCl<sub>3</sub>

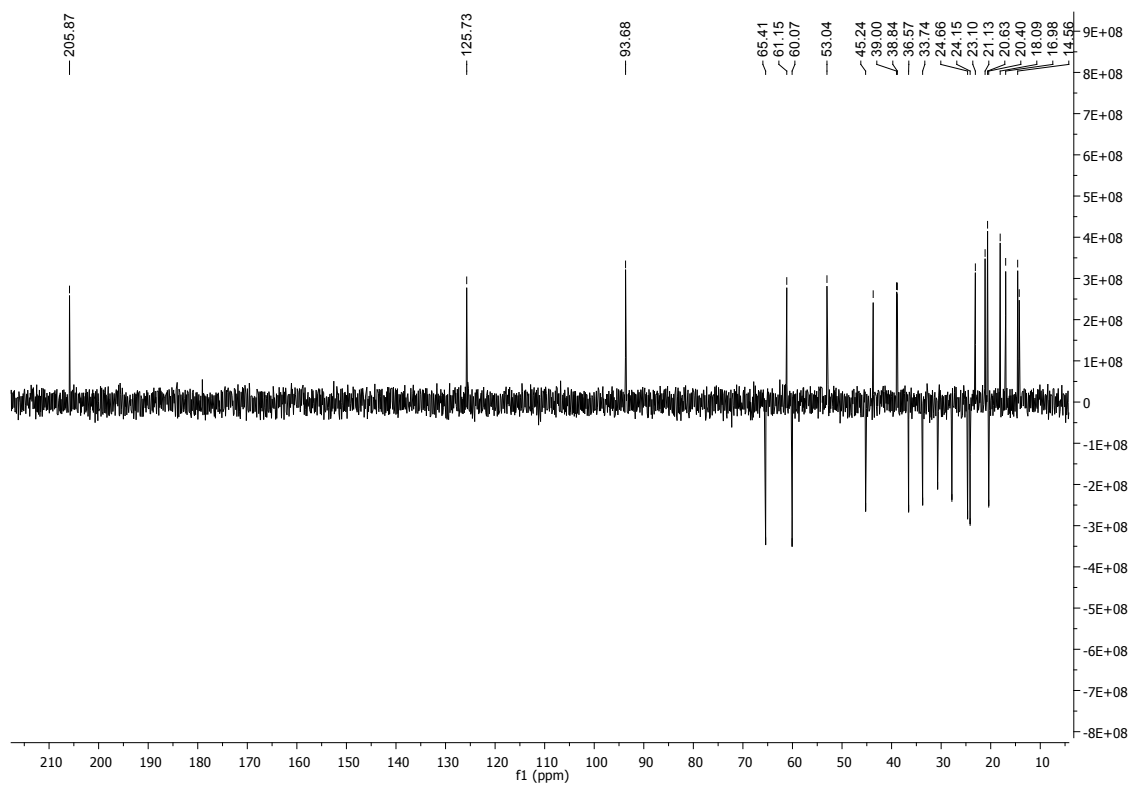

## 4. NMR data for compound 7

### 4.1 <sup>1</sup>H-NMR spectrum for compound 7 recorded in CDCl<sub>3</sub>

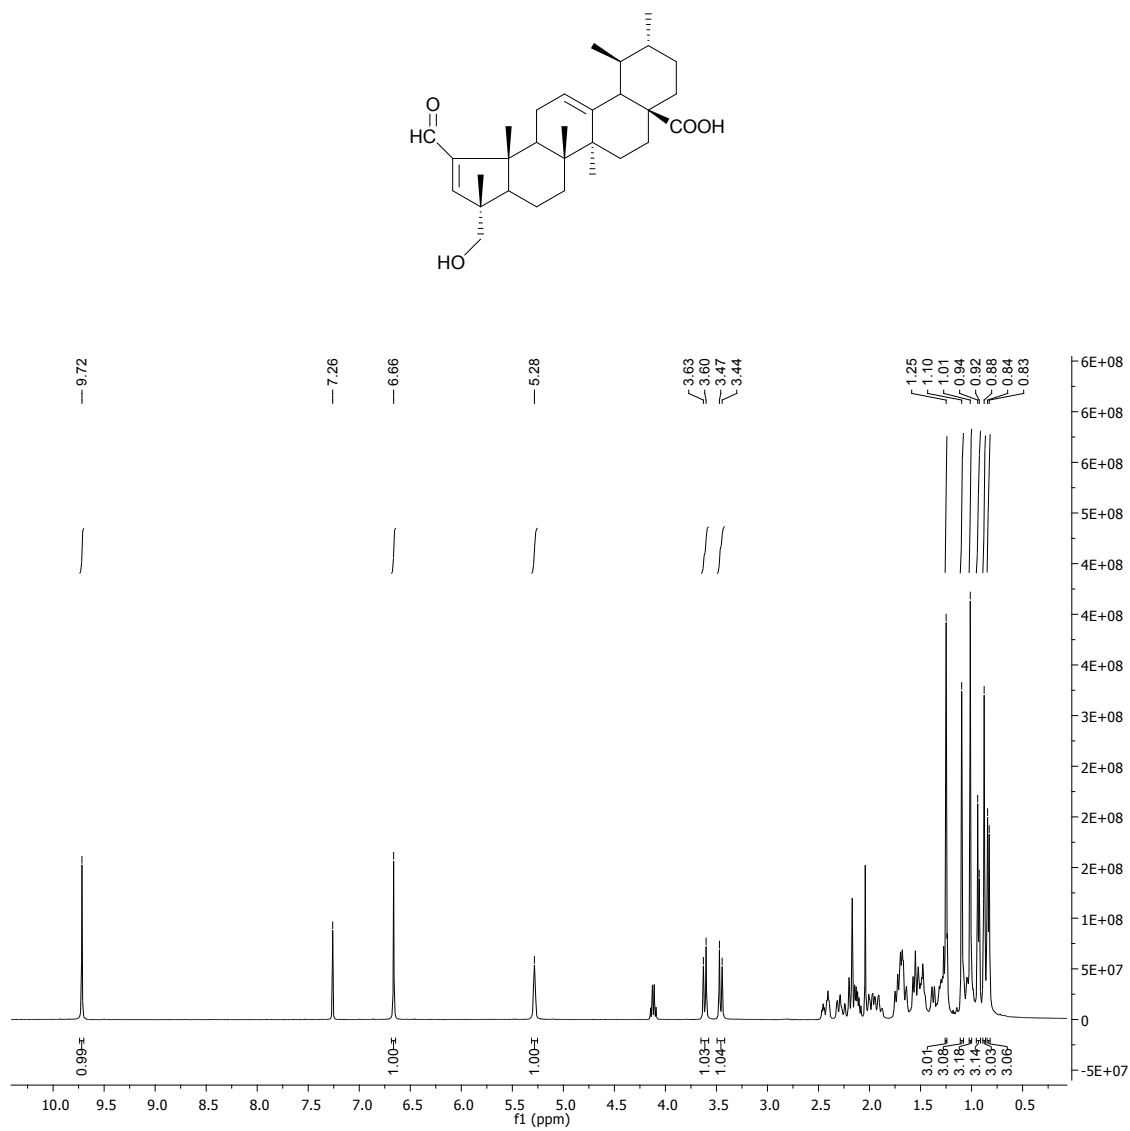

4.2  $^{13}\text{C}$ -NMR spectrum for compound 7 recorded in  $\text{CDCl}_3$

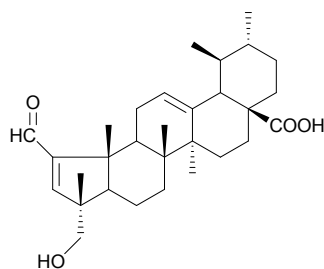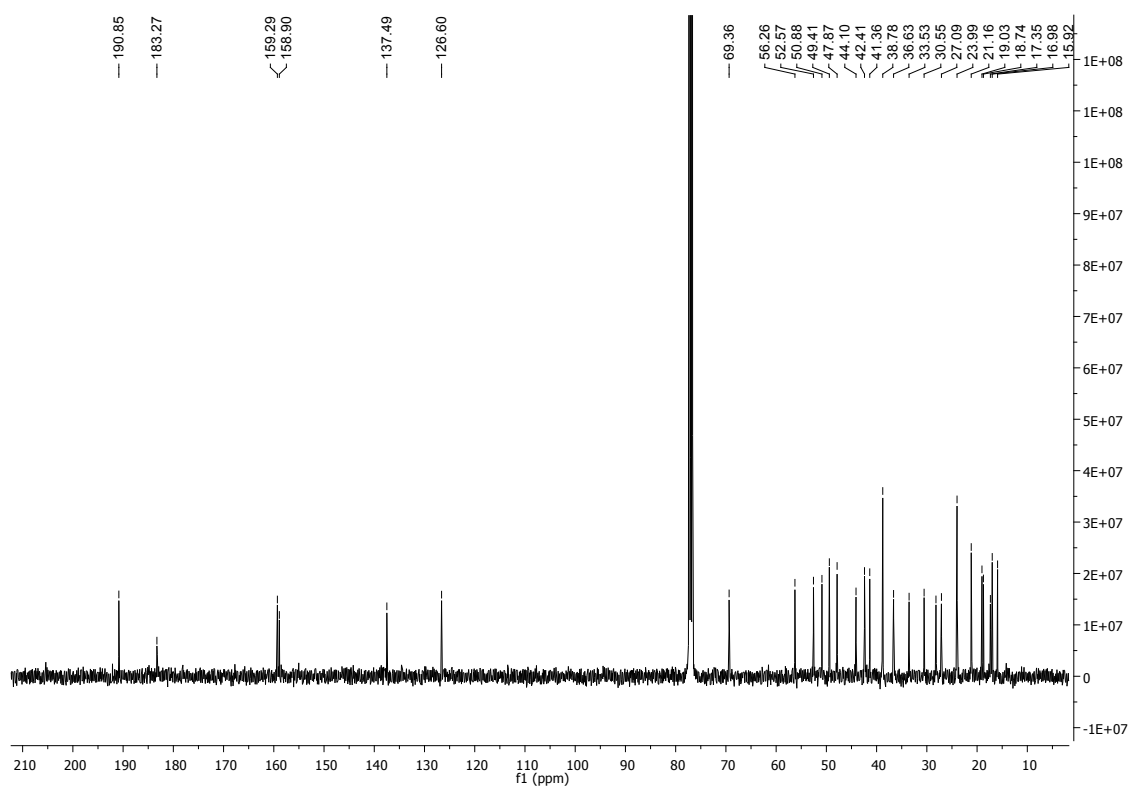



4.3 DEPT135 spectrum for compound 7 recorded in CDCl<sub>3</sub>

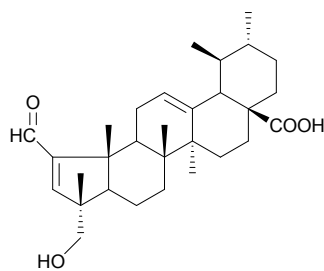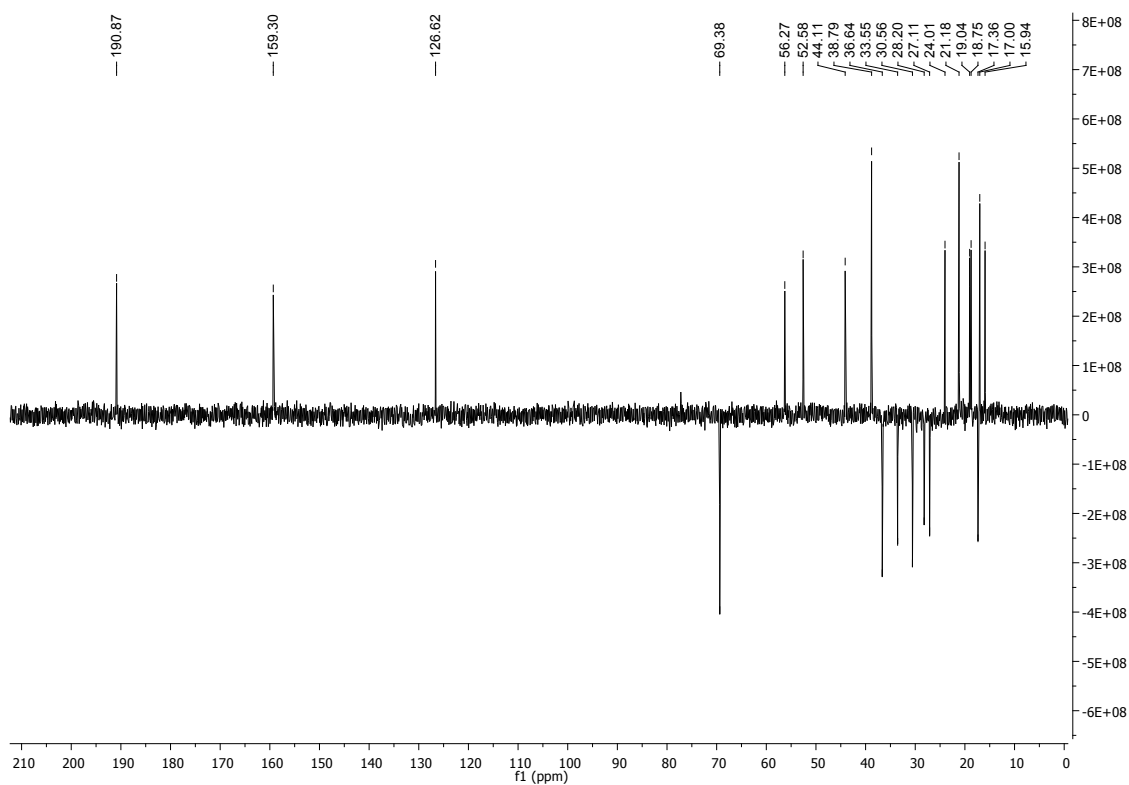

## 5. NMR data for compound 8

### 5.1 <sup>1</sup>H-NMR spectrum for compound 8 recorded in CDCl<sub>3</sub>

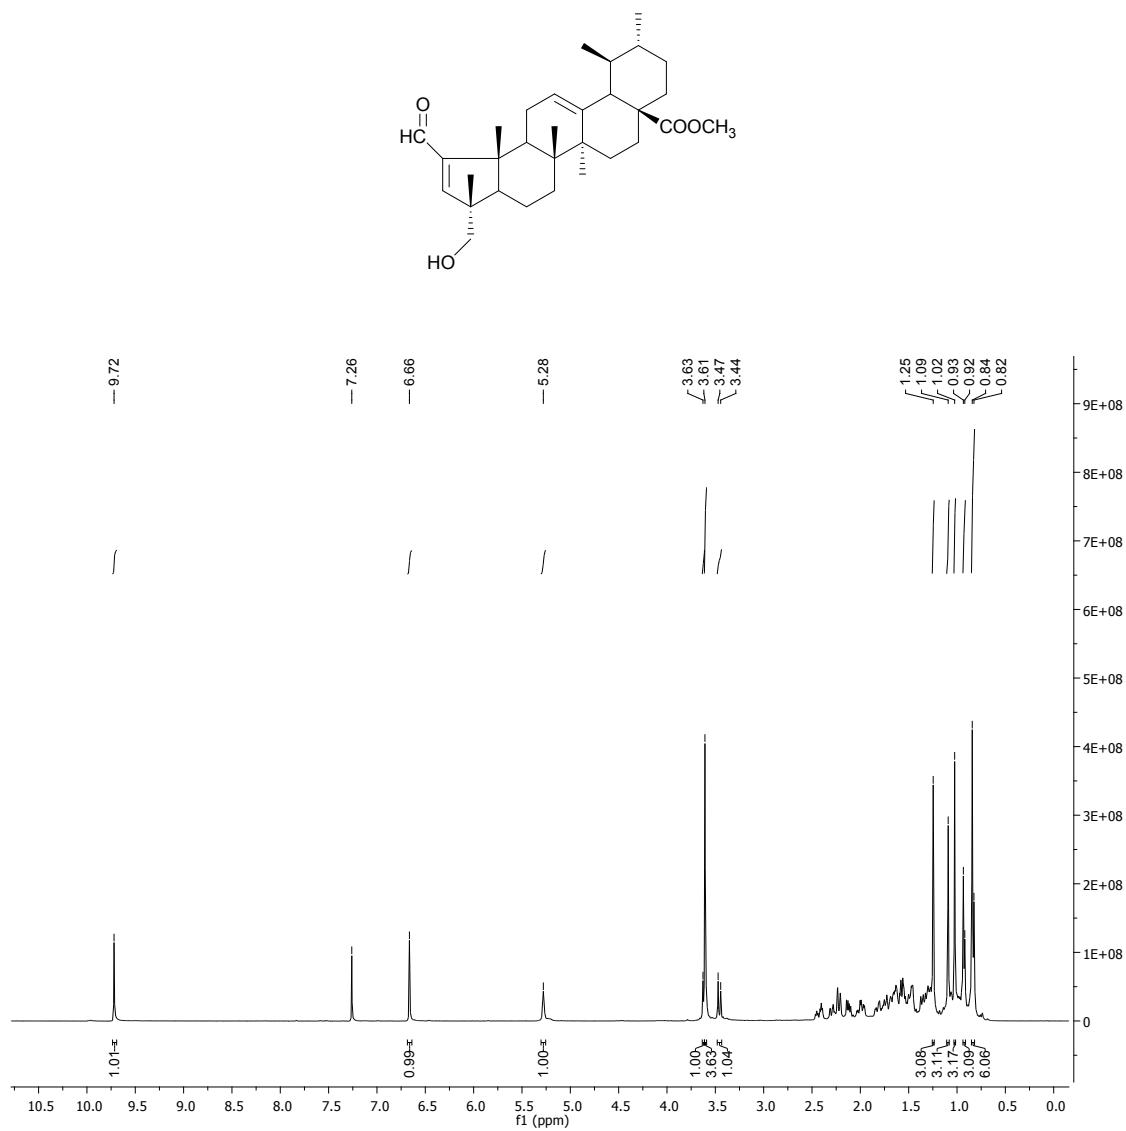

5.2  $^{13}\text{C}$ -NMR spectrum for compound 8 recorded in  $\text{CDCl}_3$

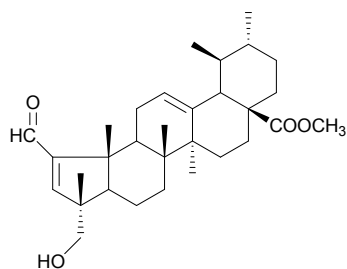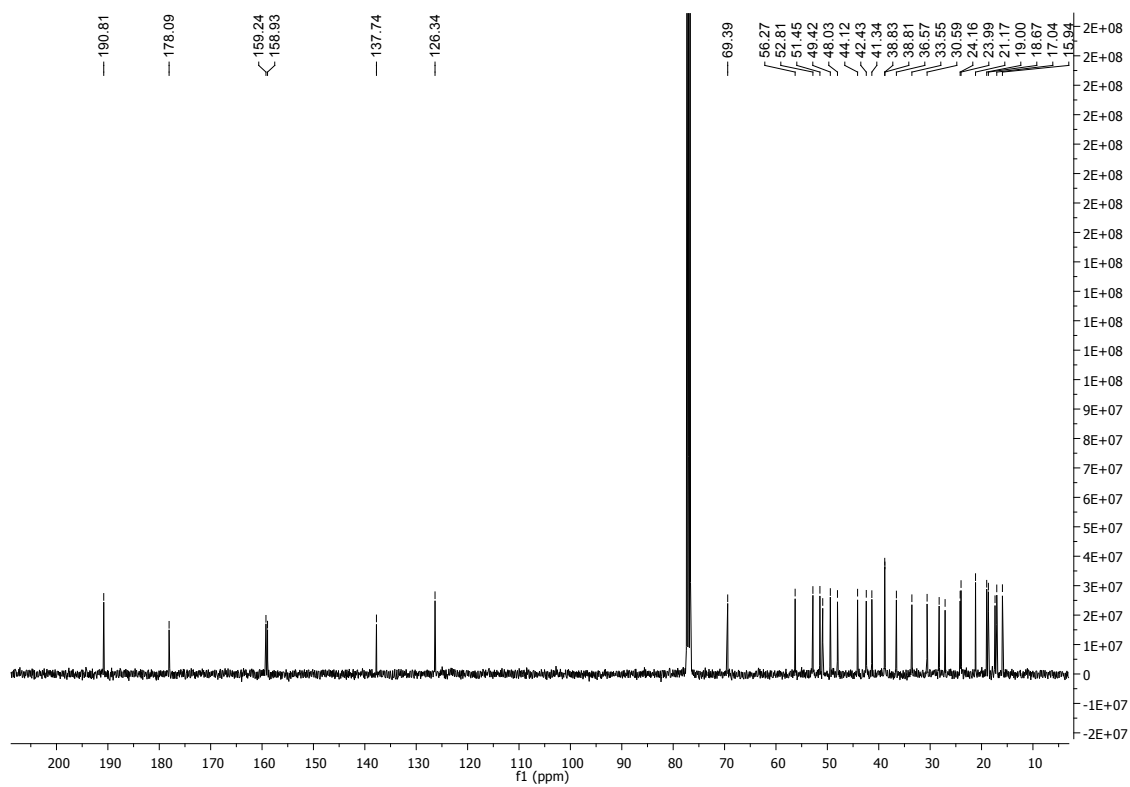

5.3 DEPT135 spectrum for compound 8 recorded in CDCl<sub>3</sub>

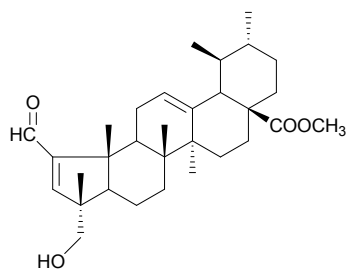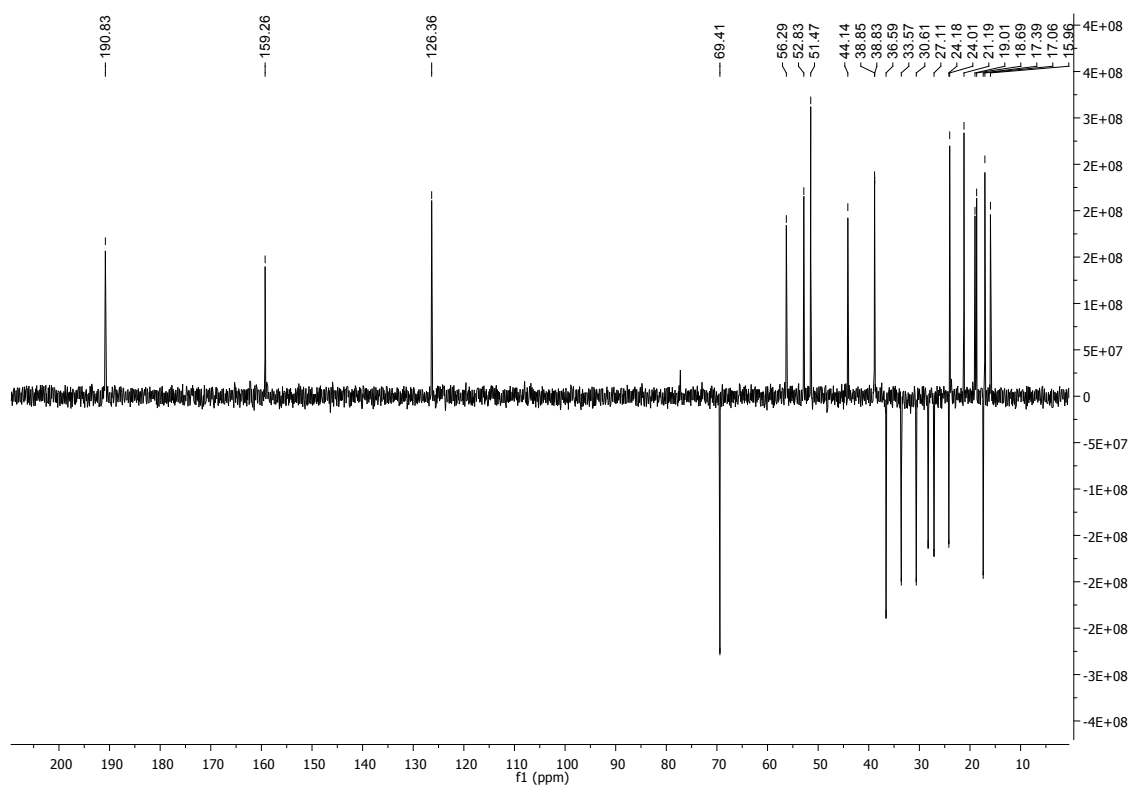

## 6. NMR data for compound 9

### 6.1 <sup>1</sup>H-NMR spectrum for compound 9 recorded in CDCl<sub>3</sub>

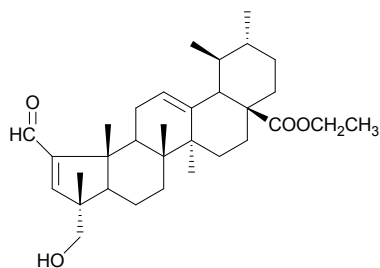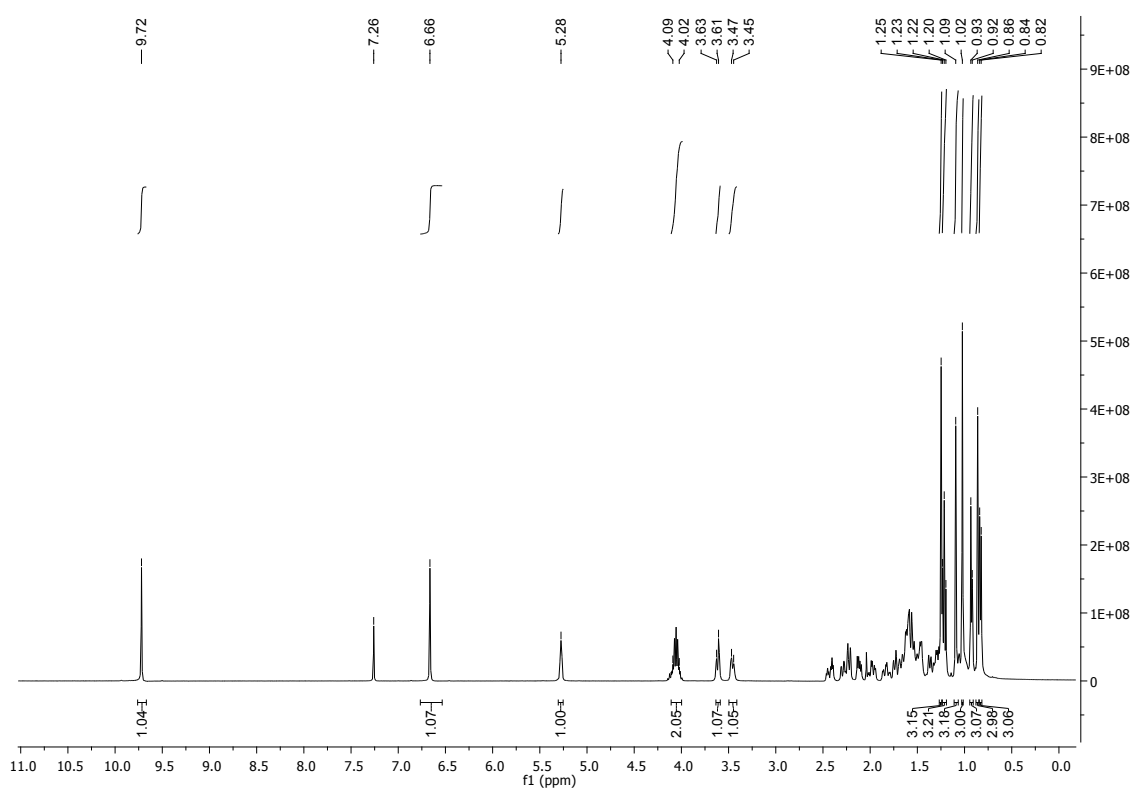

6.2  $^{13}\text{C}$ -NMR spectrum for compound 9 recorded in  $\text{CDCl}_3$

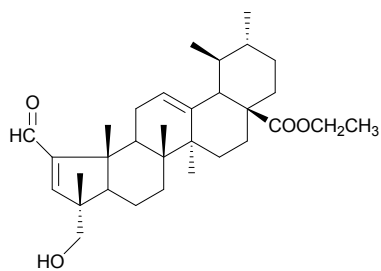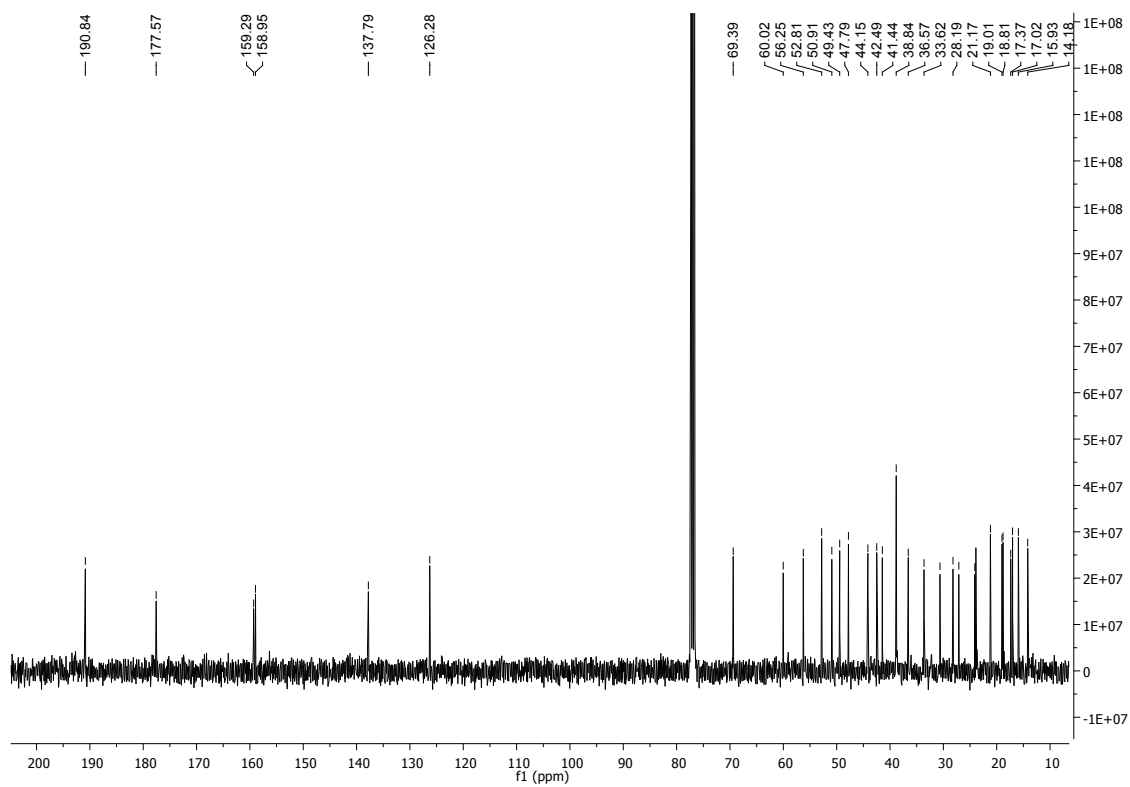

6.3 DEPT135 spectrum for compound 9 recorded in  $CDCl_3$

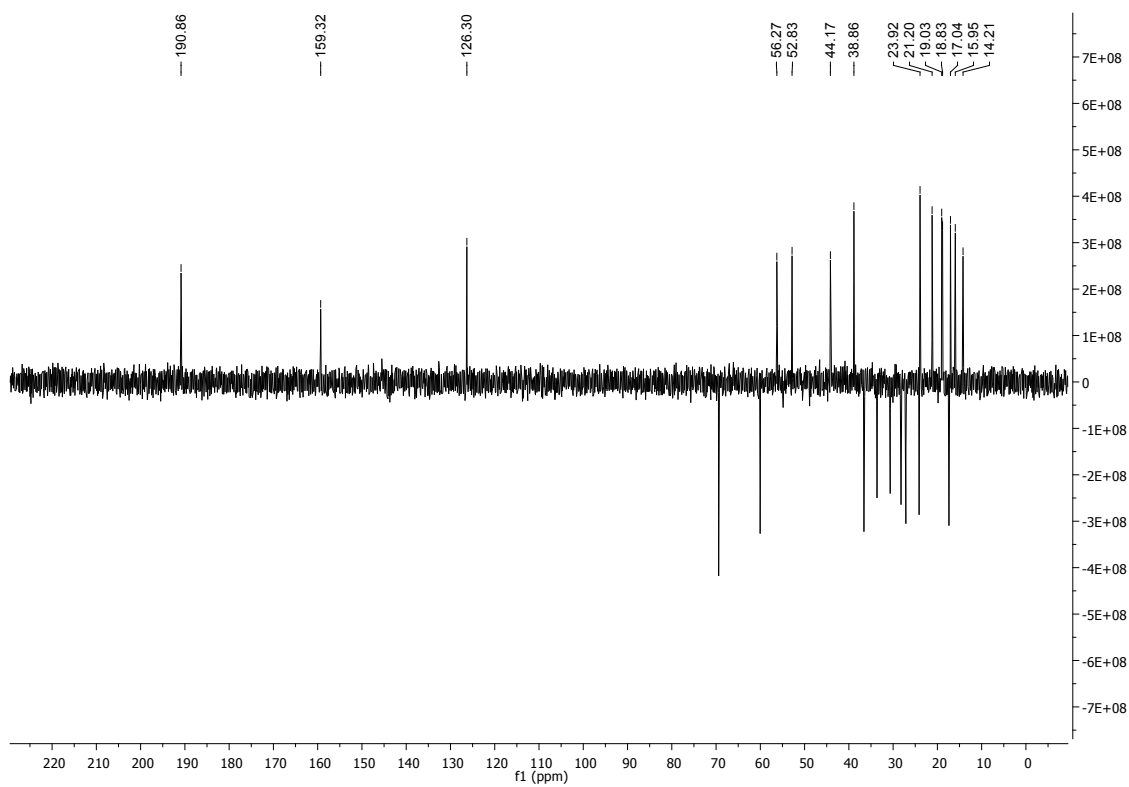

## 7. NMR data for compound 13

7.1  $^1\text{H-NMR}$  spectrum for compound 13 recorded in  $\text{CDCl}_3$

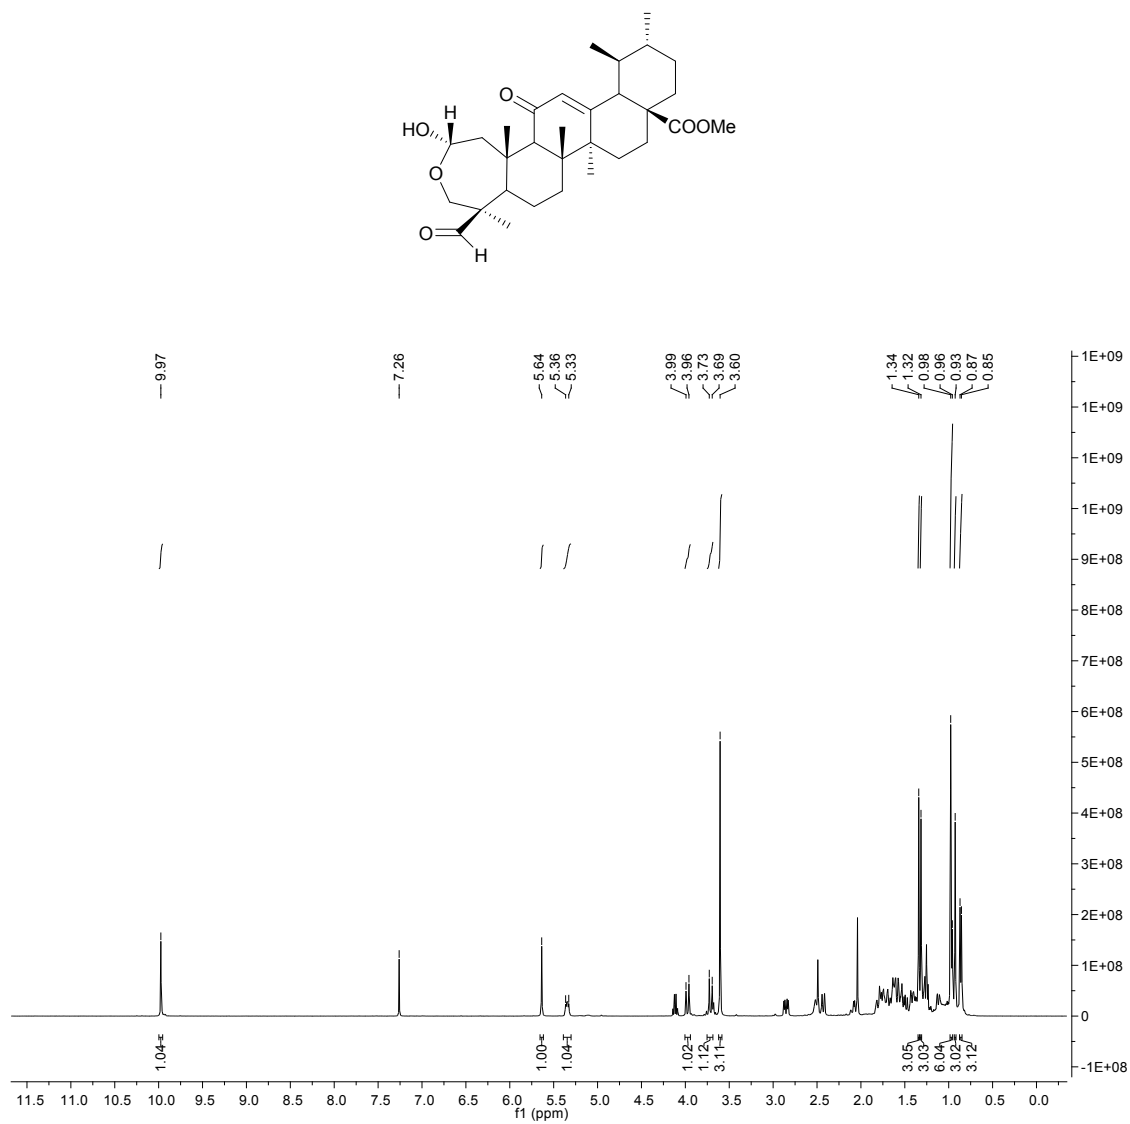



7.2  $^{13}\text{C}$ -NMR spectrum for compound 13 recorded in  $\text{CDCl}_3$

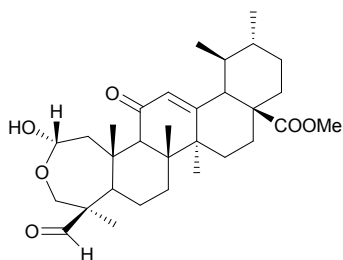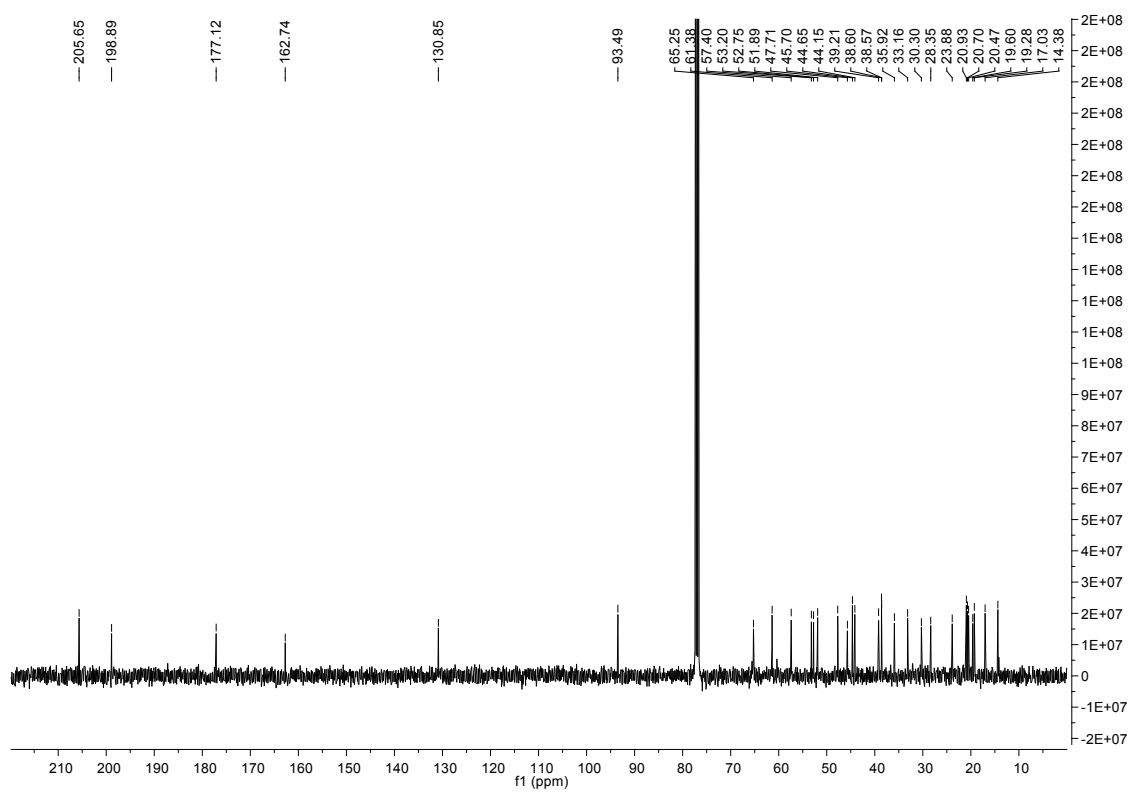

7.3 DEPT135 spectrum for compound 13 recorded in CDCl<sub>3</sub>

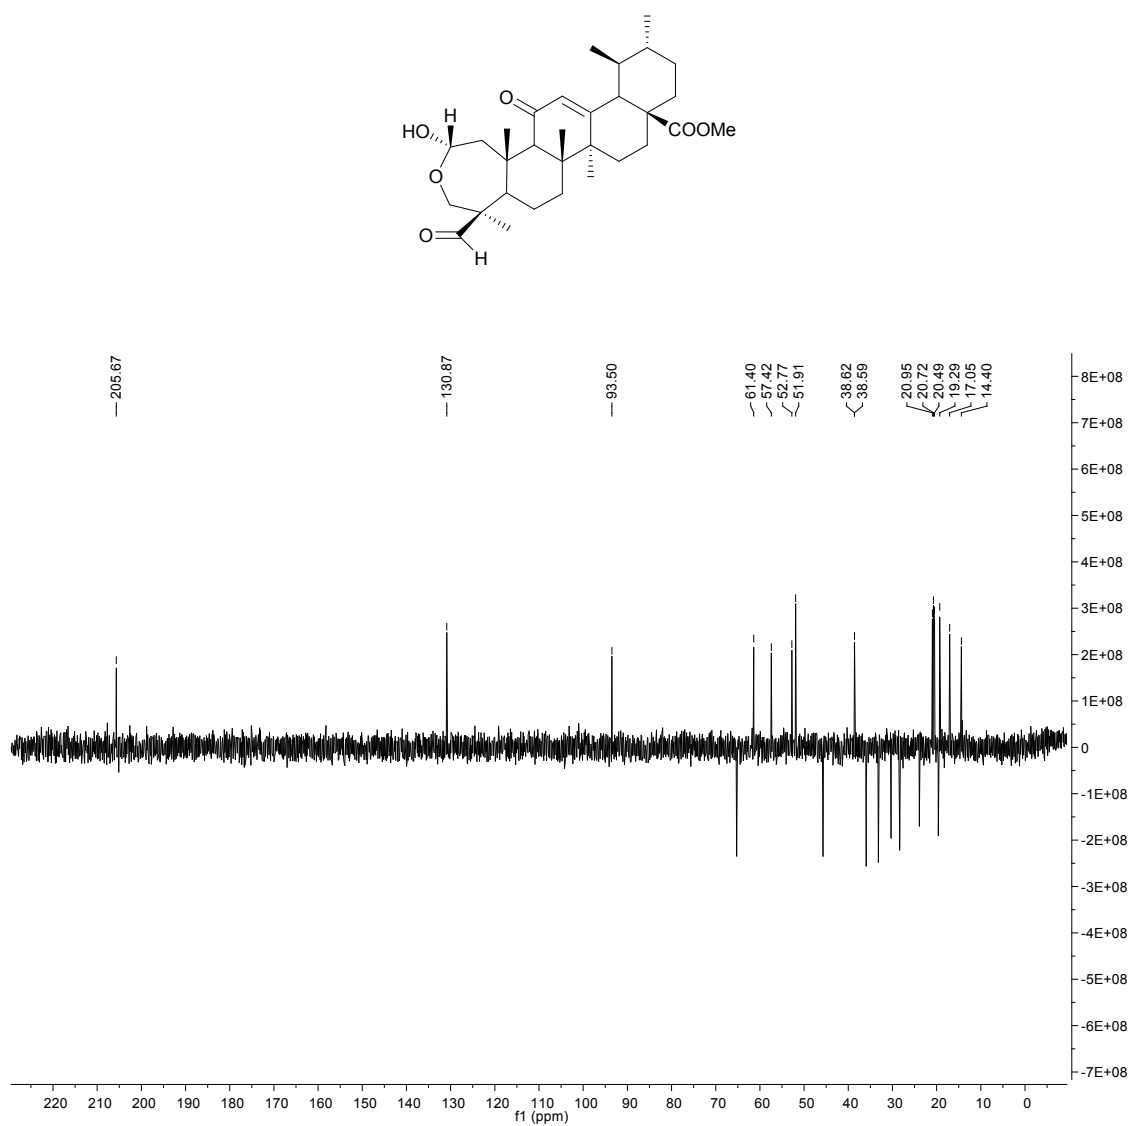

## 8. NMR data for compound 14

8.1  $^1\text{H-NMR}$  spectrum for compound 14 recorded in  $\text{CDCl}_3$

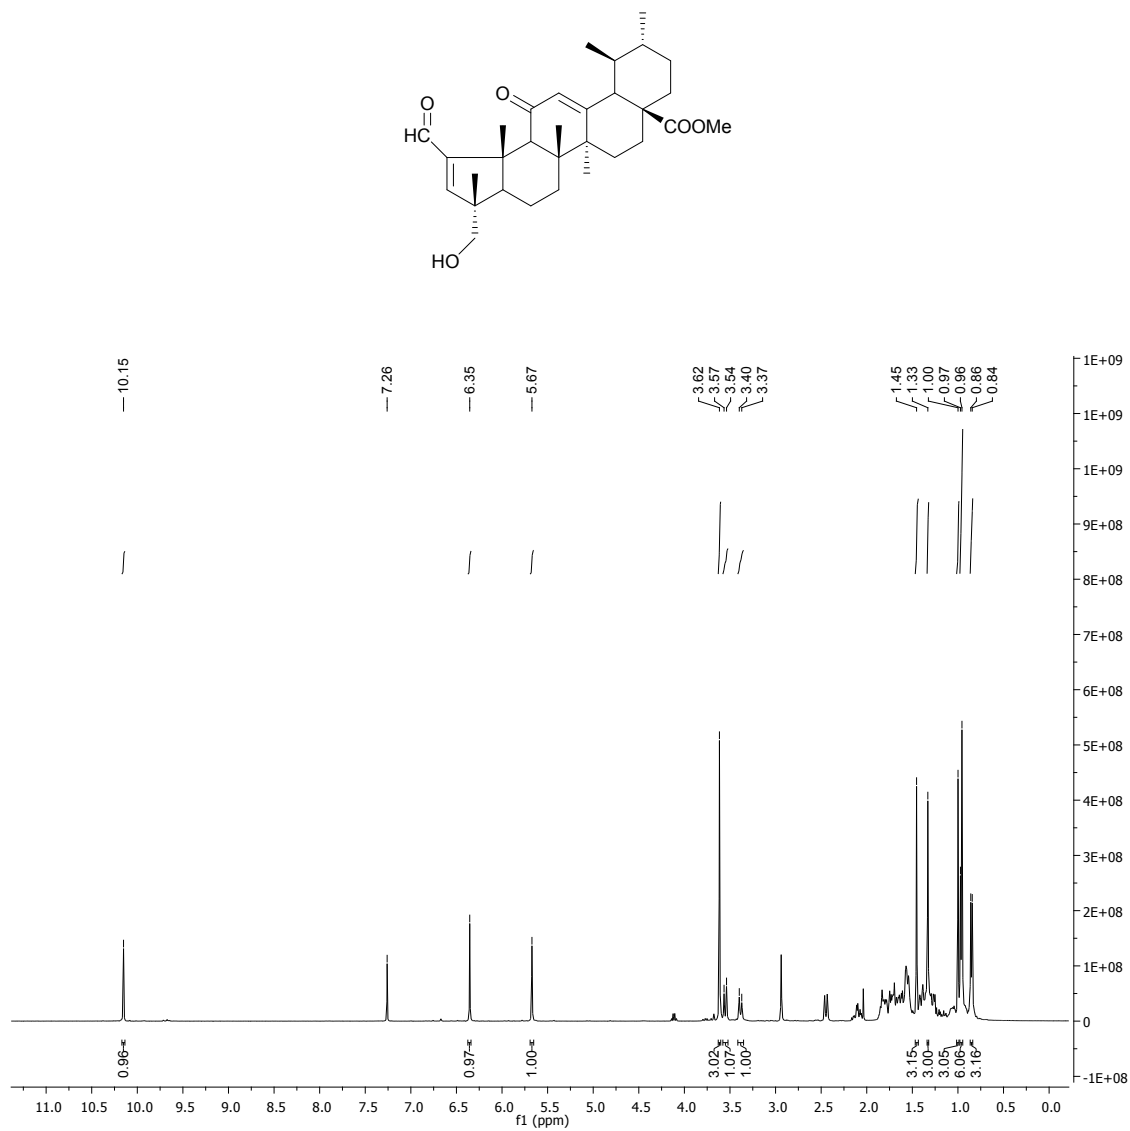

8.2  $^{13}\text{C}$ -NMR spectrum for compound 14 recorded in  $\text{CDCl}_3$

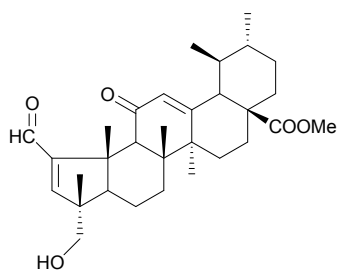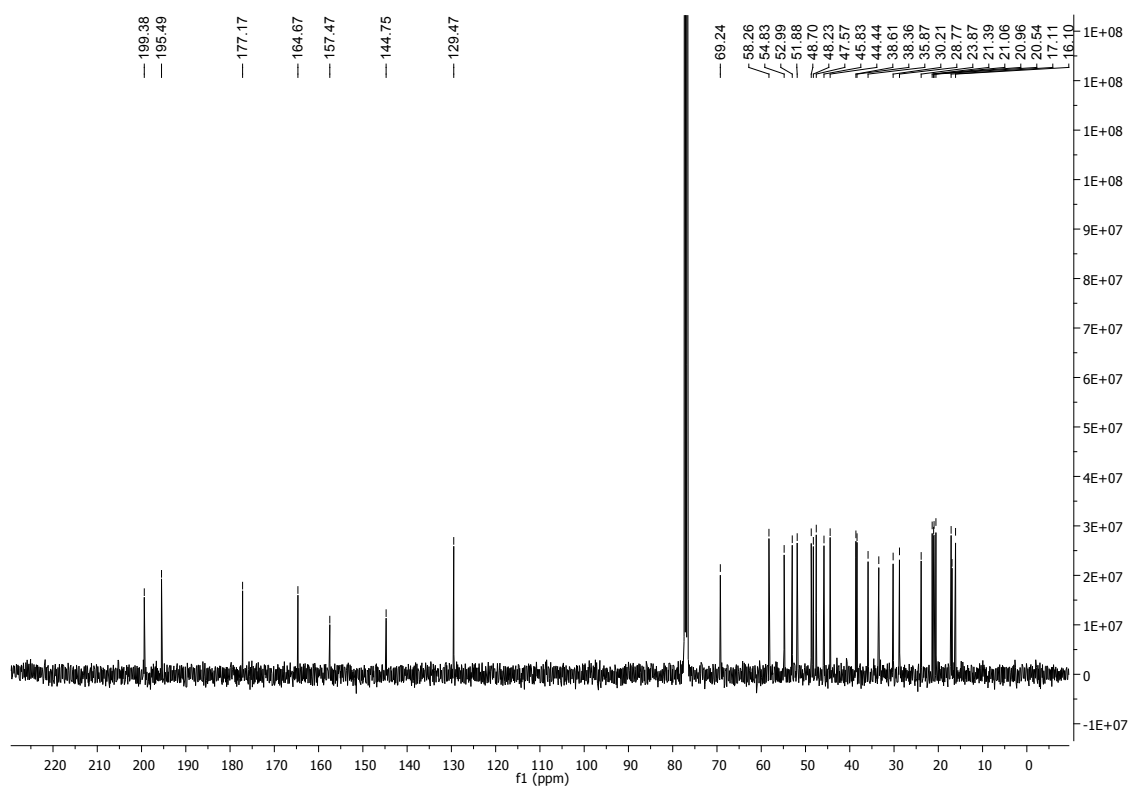

8.3 DEPT135 spectrum for compound 14 recorded in CDCl<sub>3</sub>

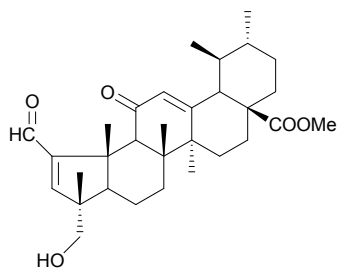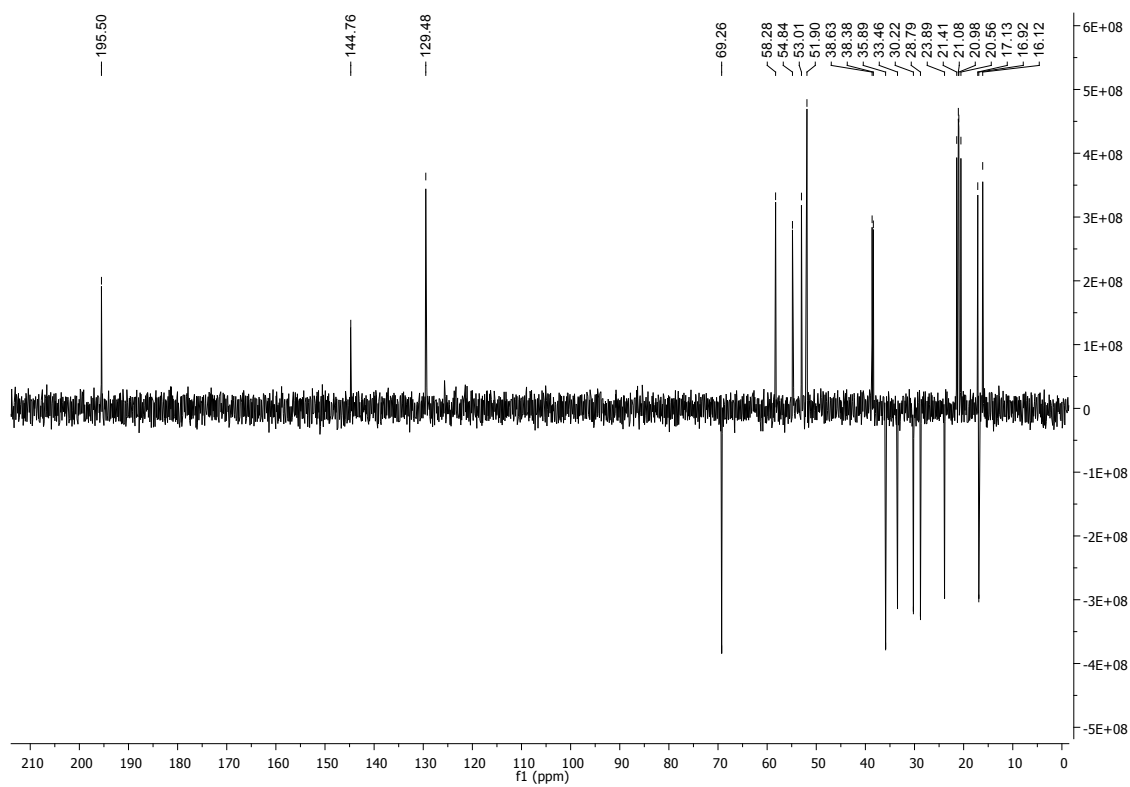

## 9. NMR data for compound 15

9.1  $^1\text{H-NMR}$  spectrum for compound 15 recorded in  $\text{CDCl}_3$

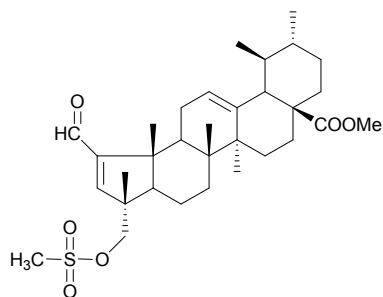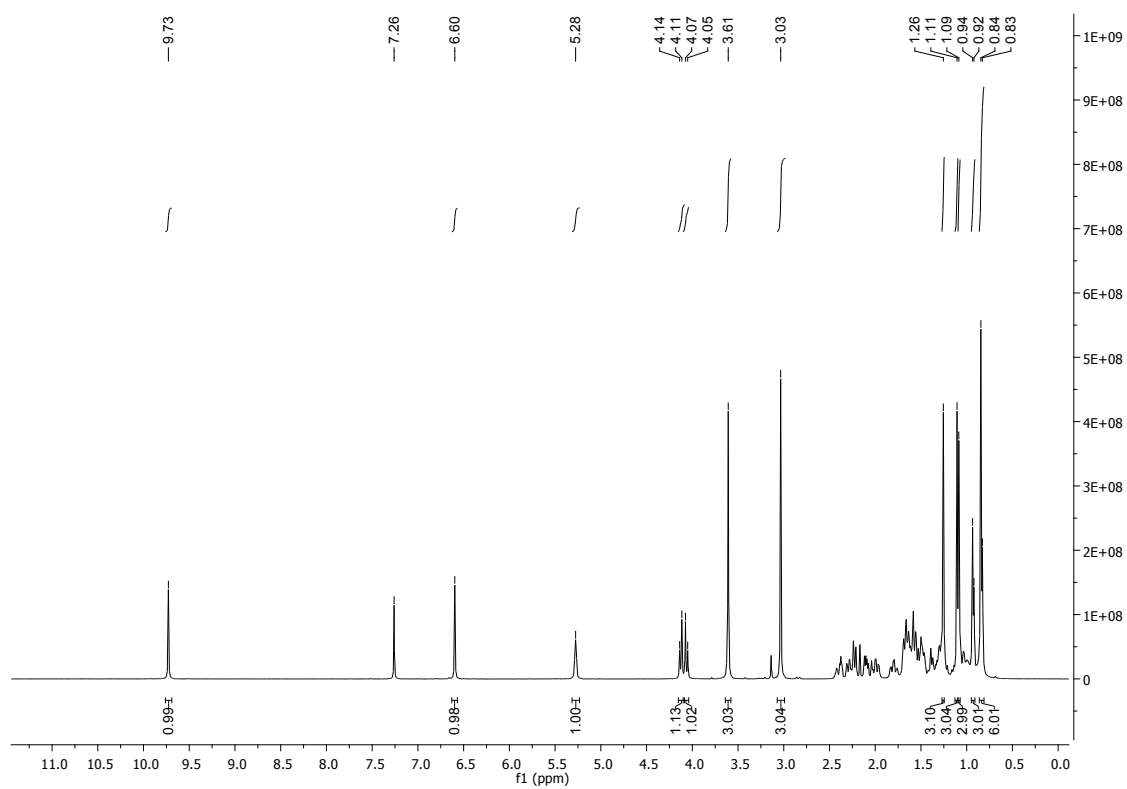

9.2  $^{13}\text{C}$ -NMR spectrum for compound 15 recorded in  $\text{CDCl}_3$

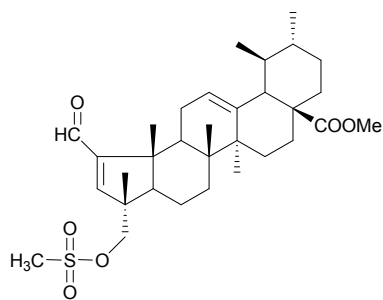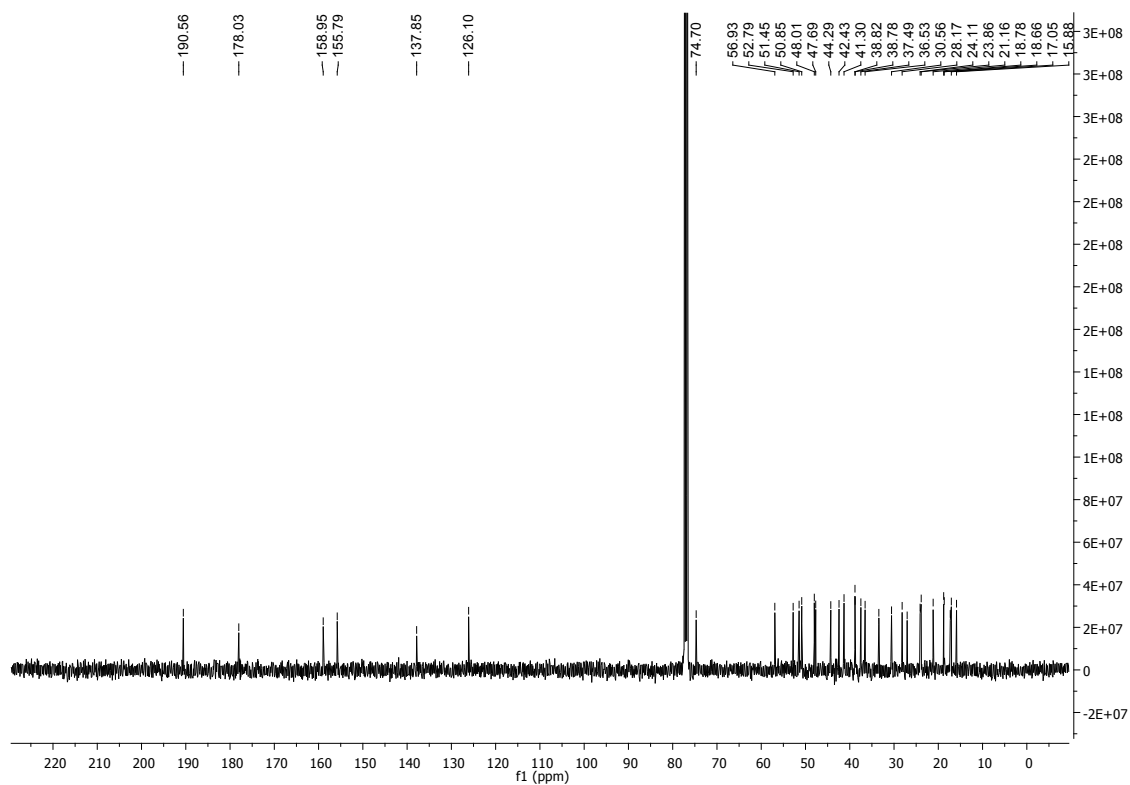

9.3 DEPT135 spectrum for compound 15 recorded in CDCl<sub>3</sub>

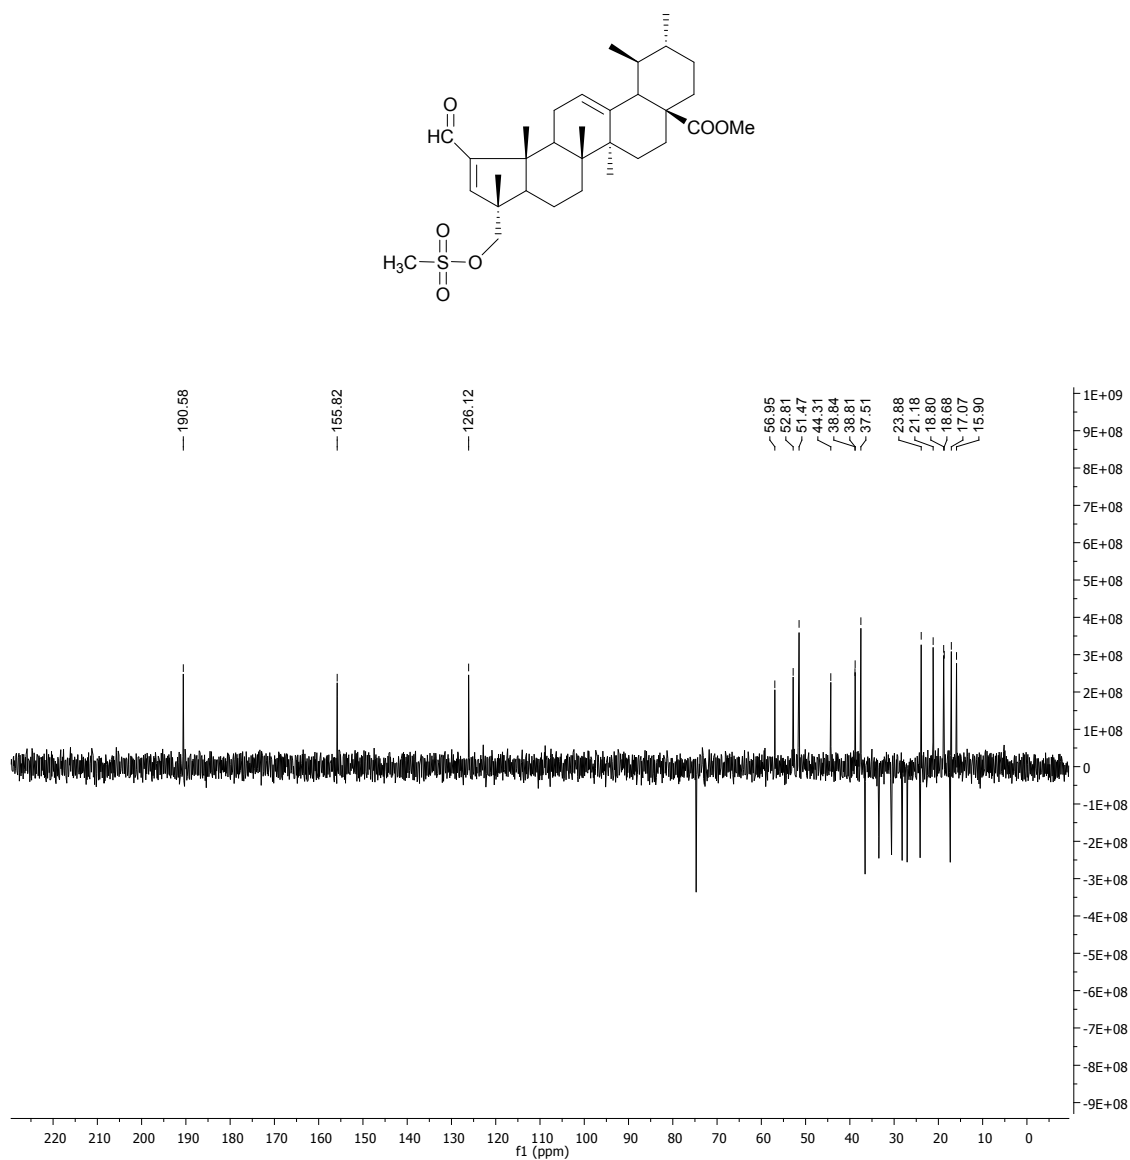



## 10. NMR data for compound 16

### 10.1 <sup>1</sup>H-NMR spectrum for compound 16 recorded in CDCl<sub>3</sub>

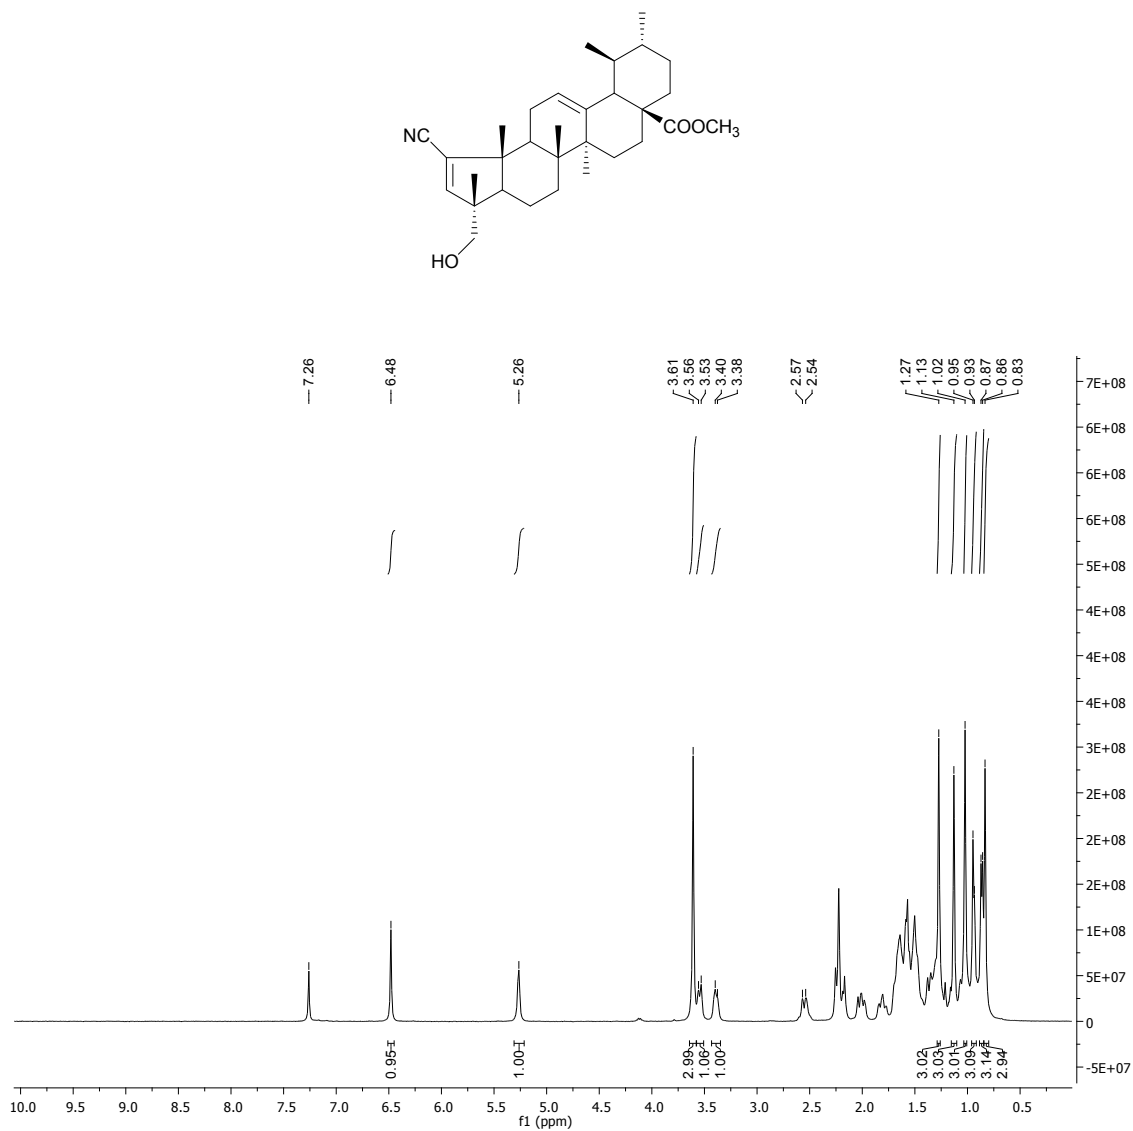

10.2  $^{13}\text{C}$ -NMR spectrum for compound 16 recorded in  $\text{CDCl}_3$

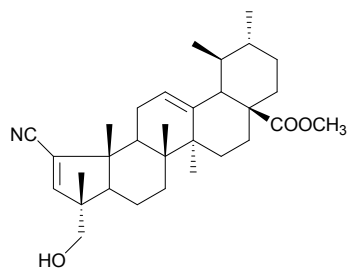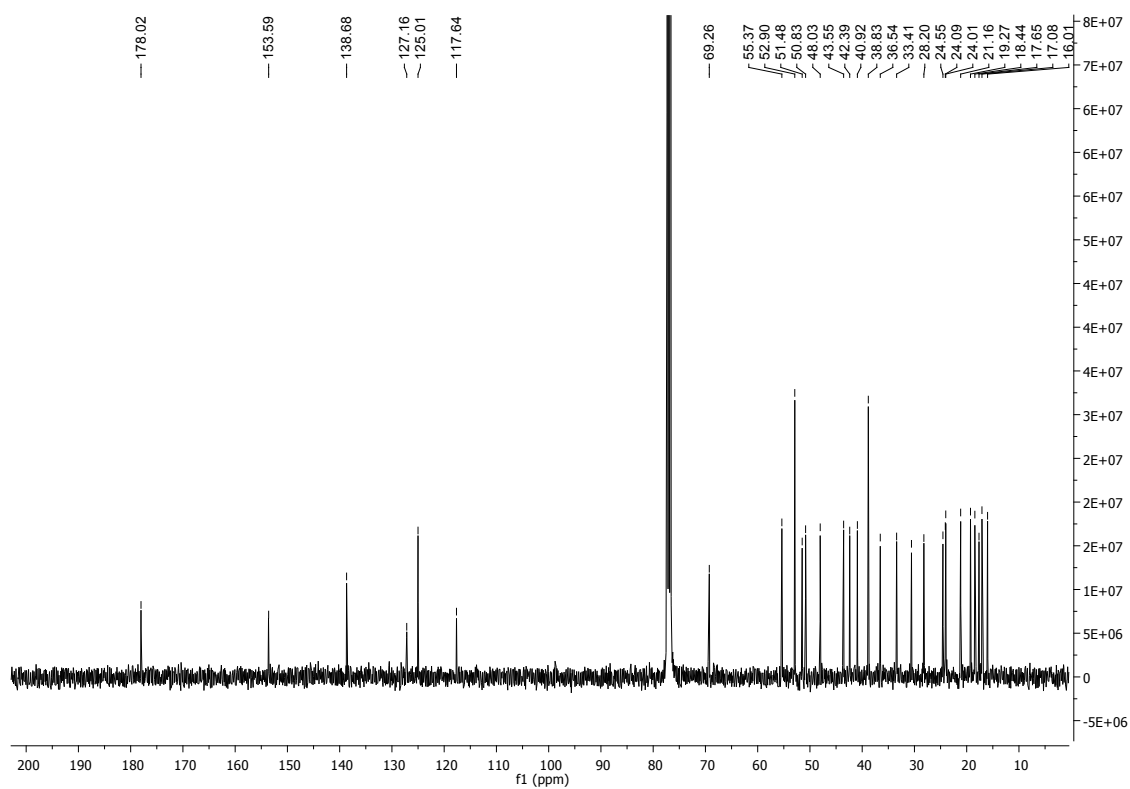

10.3 DEPT135 spectrum for compound 16 recorded in CDCl<sub>3</sub>

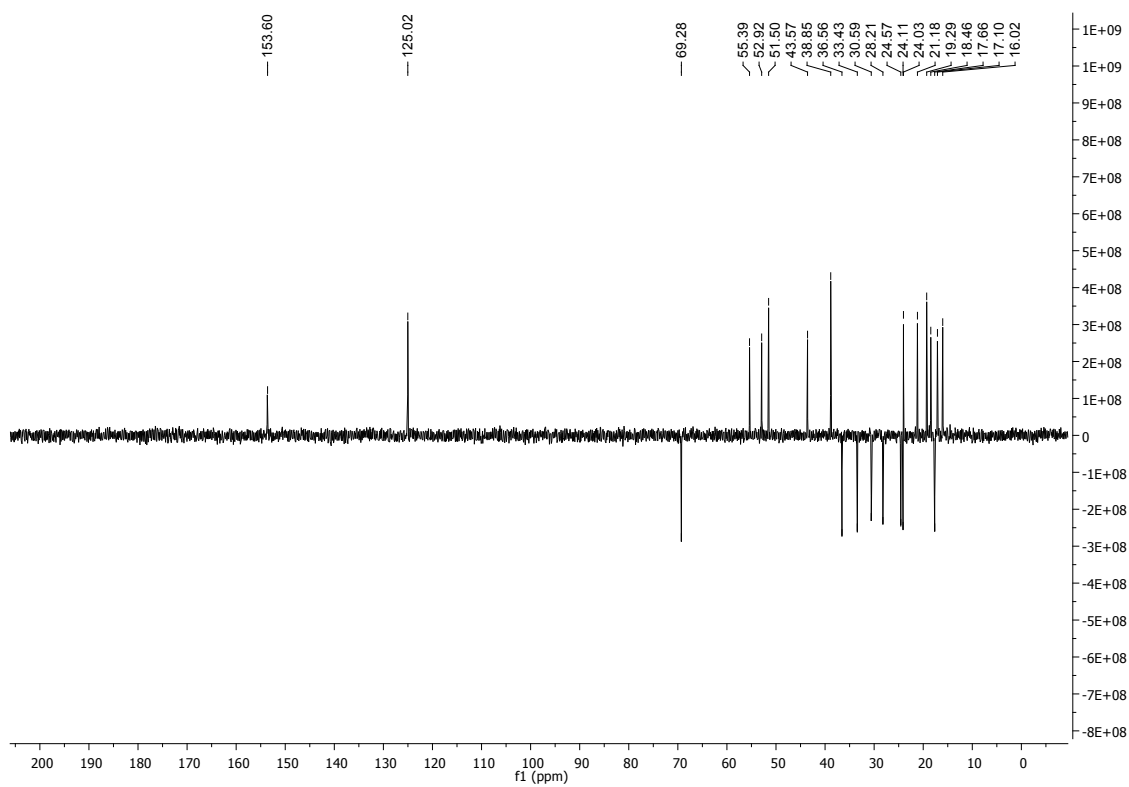

## 11. NMR data for compound 17

11.1  $^1\text{H-NMR}$  spectrum for compound 17 recorded in  $\text{CDCl}_3$

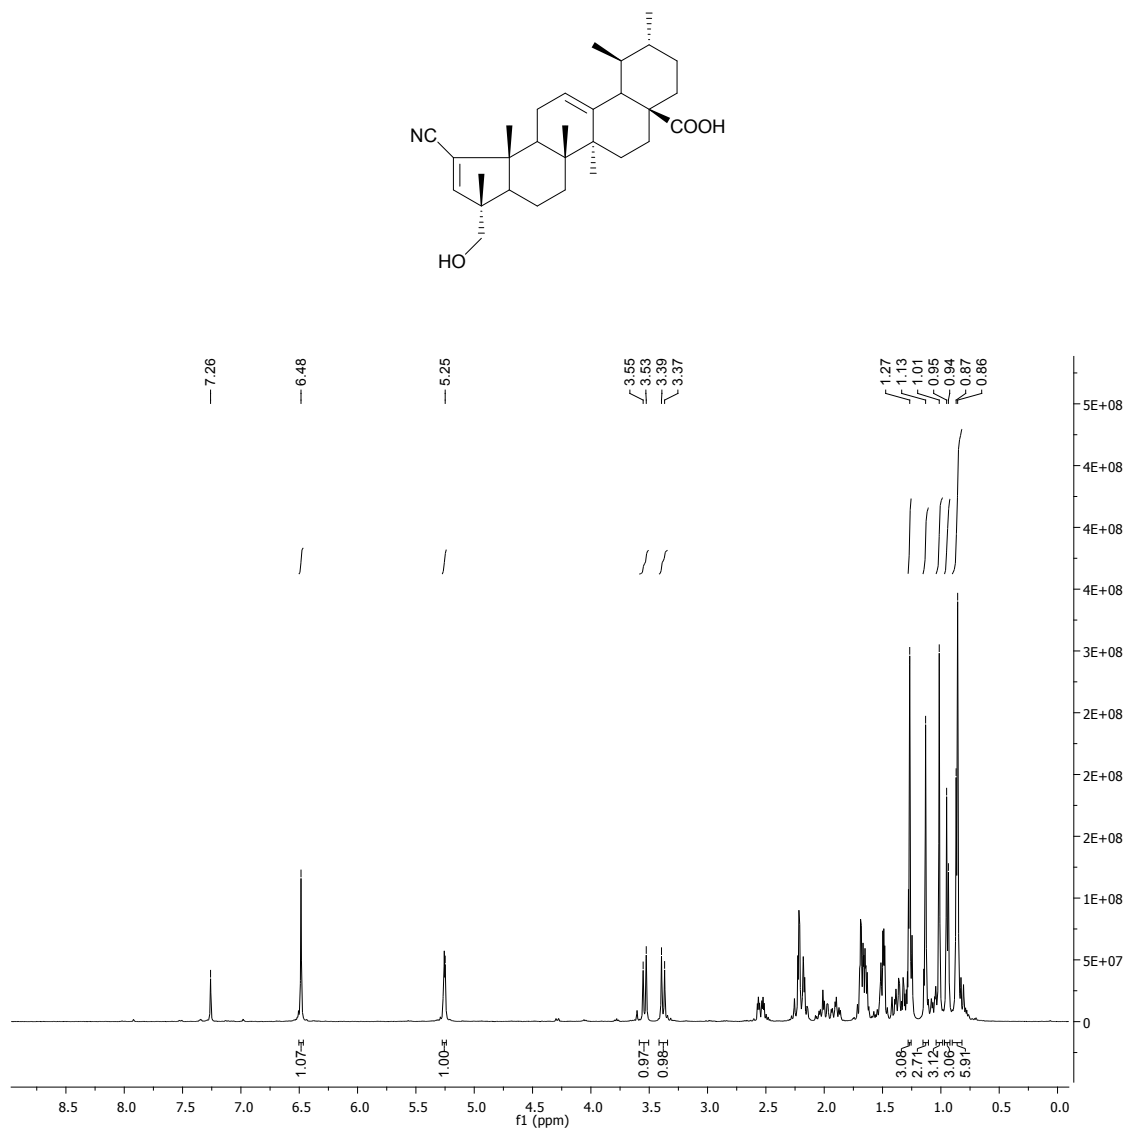

11.2  $^{13}\text{C}$ -NMR spectrum for compound 17 recorded in  $\text{CDCl}_3$

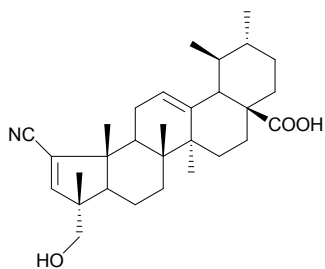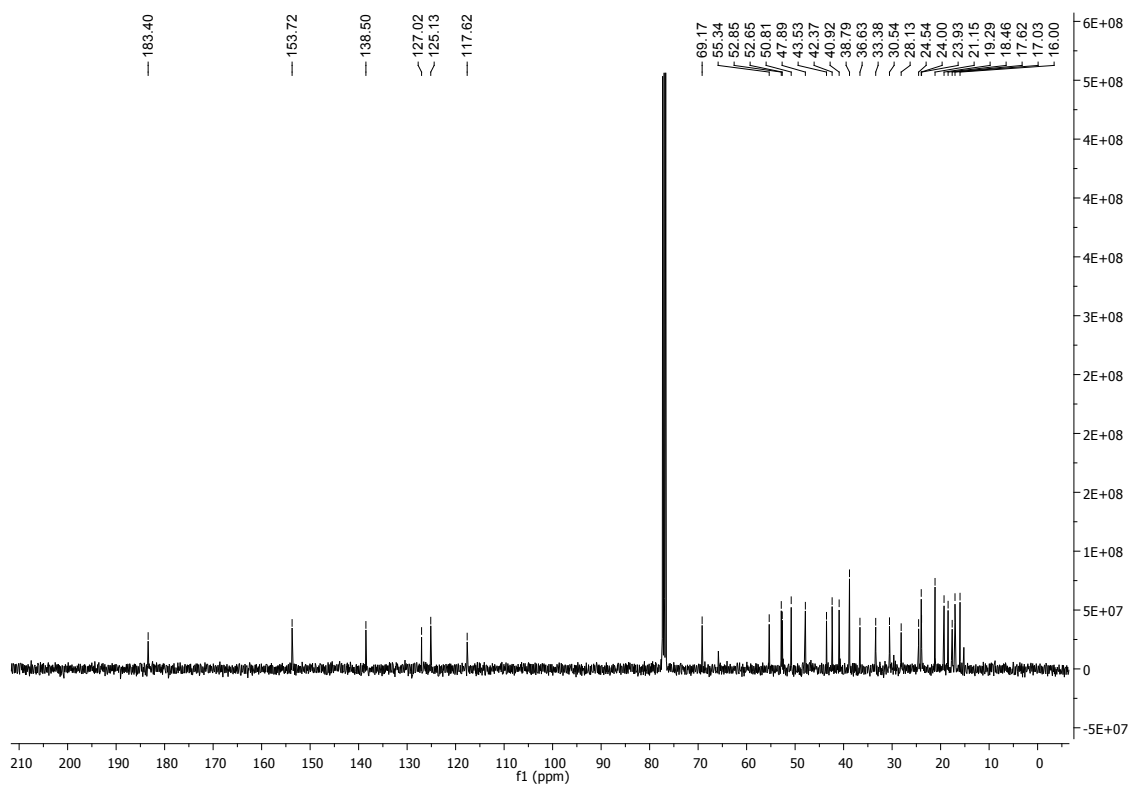

11.3 DEPT135 spectrum for compound 17 recorded in CDCl<sub>3</sub>

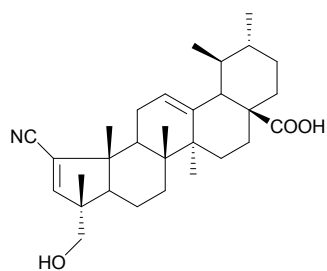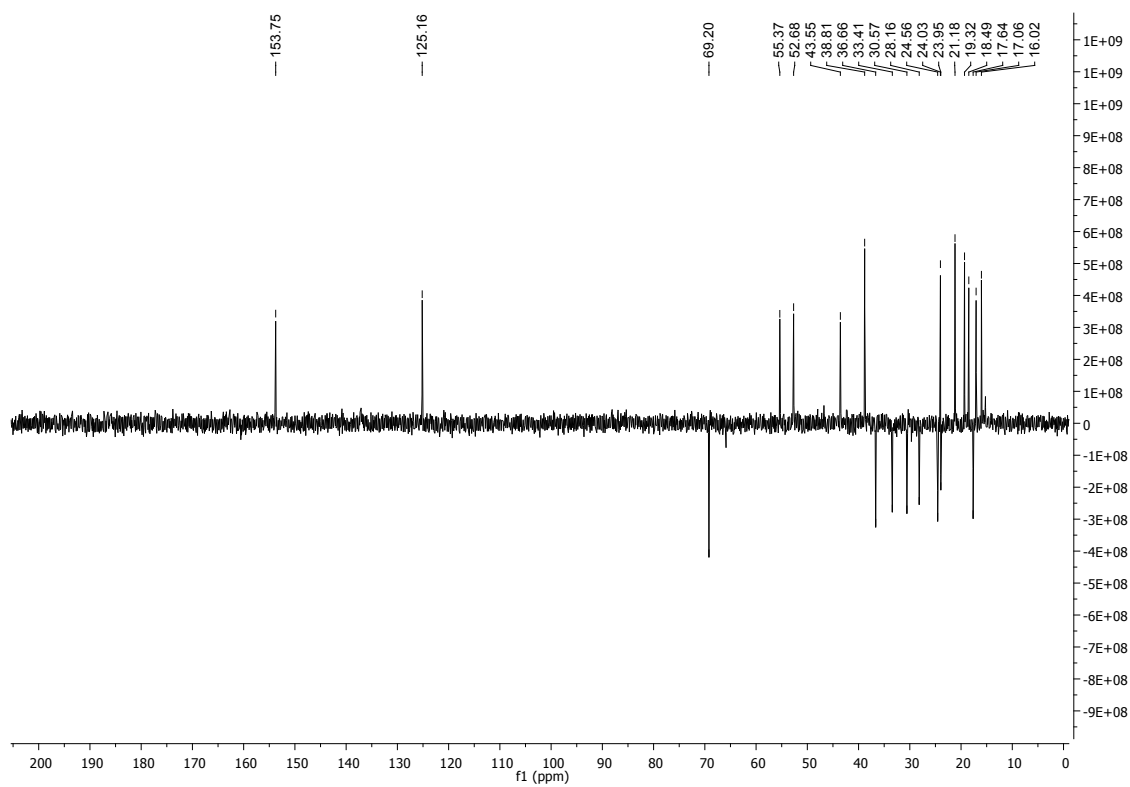

## 12. NMR data for compound 18

### 12.1 $^1\text{H-NMR}$ spectrum for compound 18 recorded in $\text{CDCl}_3$

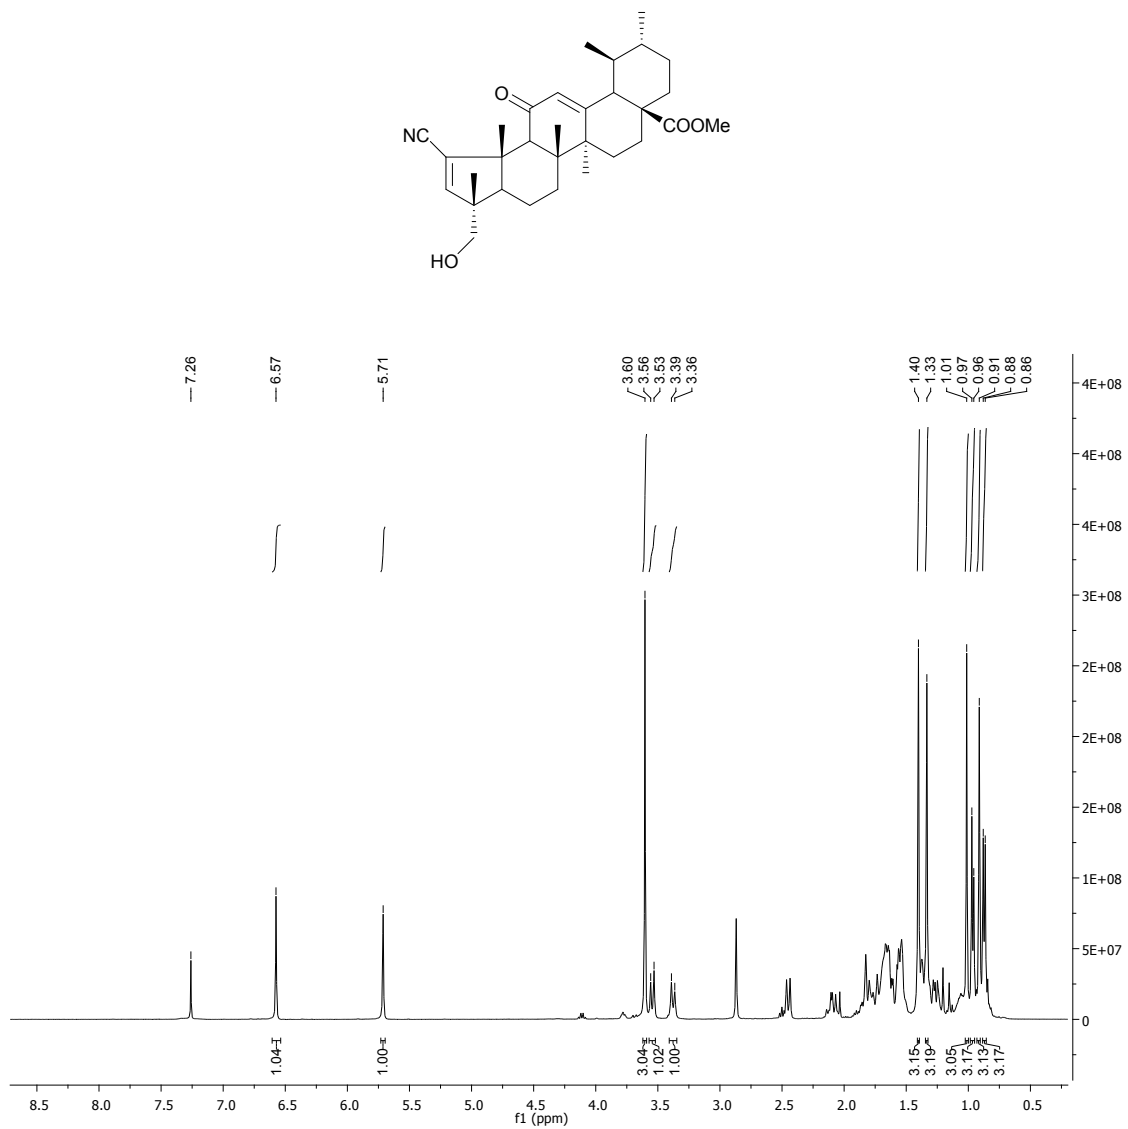

12.2 <sup>13</sup>C-NMR spectrum for compound 18 recorded in CDCl<sub>3</sub>

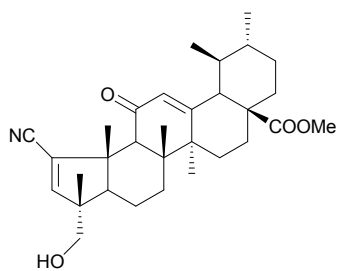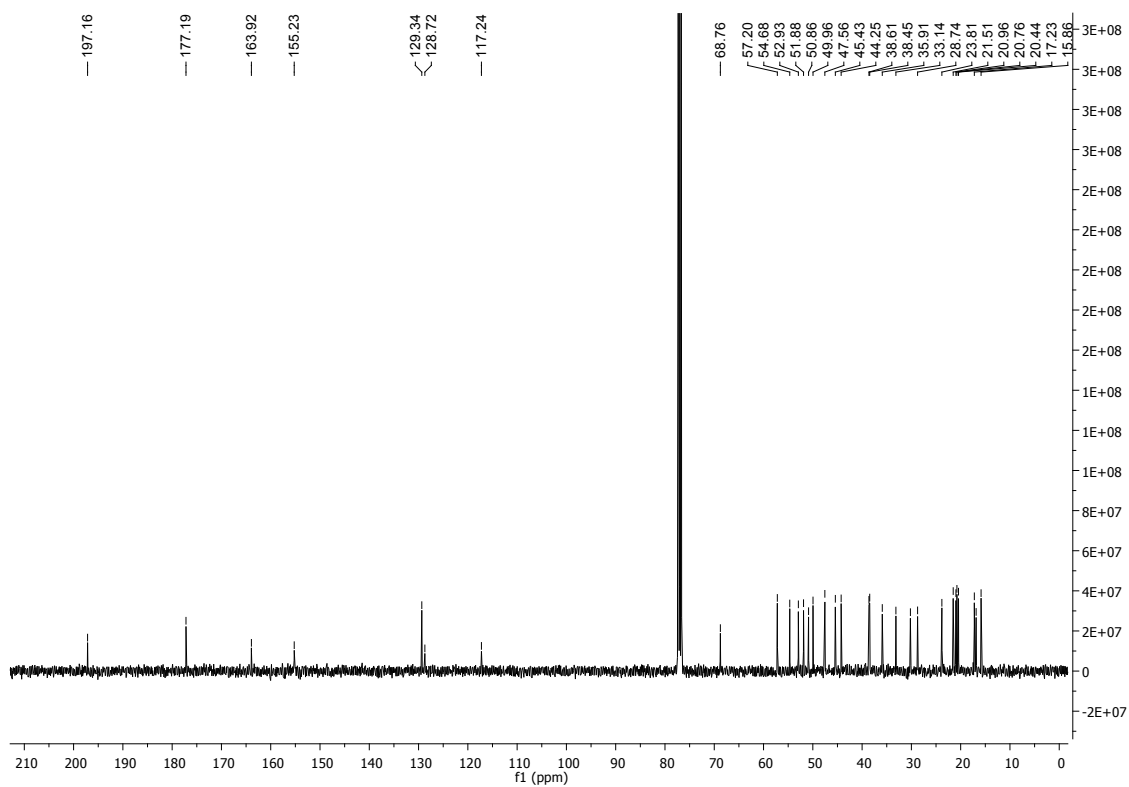



12.3 DEPT135 spectrum for compound 18 recorded in CDCl<sub>3</sub>

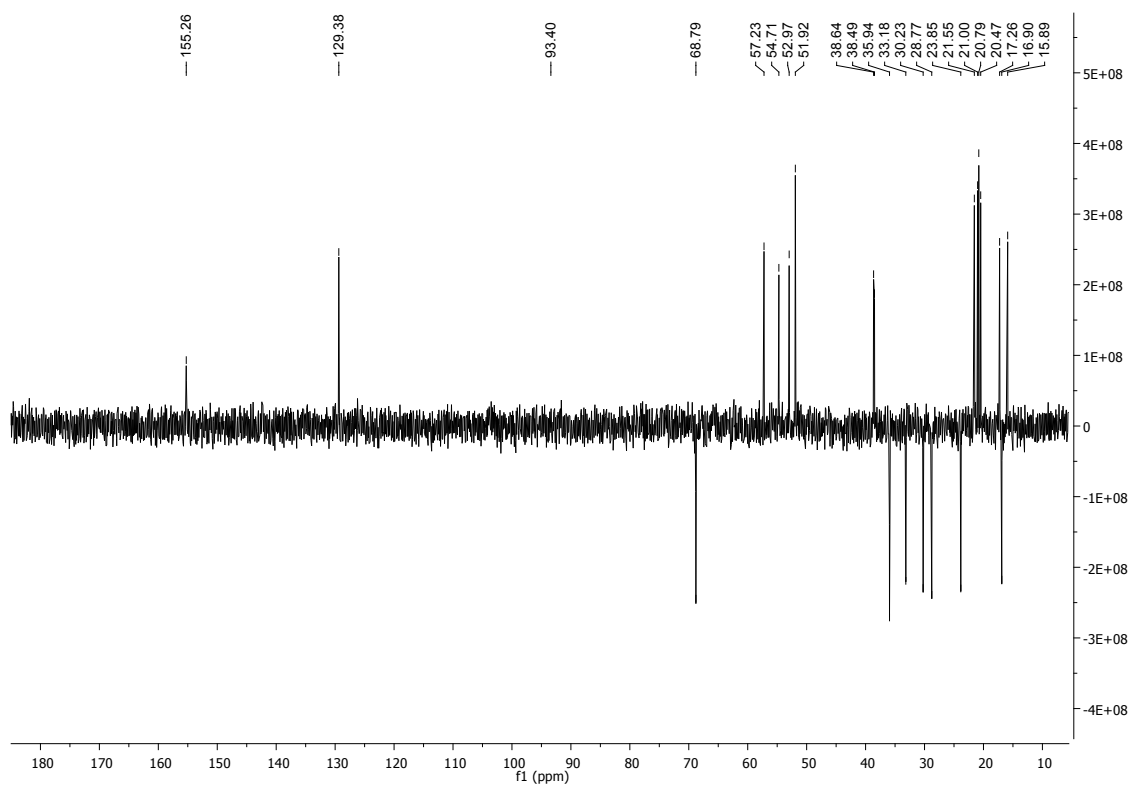

### 13. NMR data for compound 19

#### 13.1 <sup>1</sup>H-NMR spectrum for compound 19 recorded in CDCl<sub>3</sub>

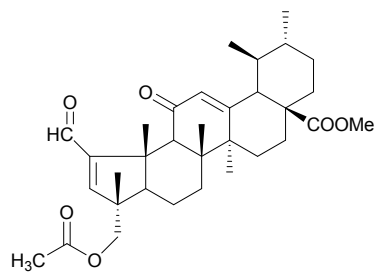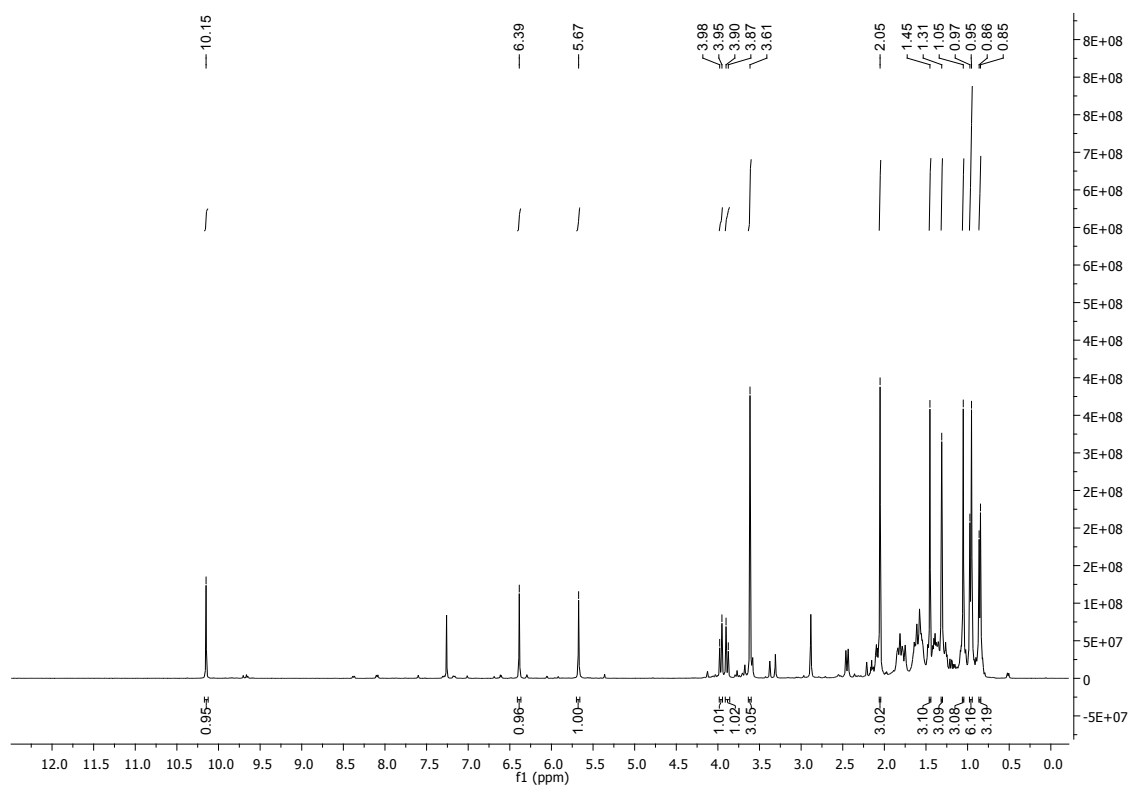

13.2  $^{13}\text{C}$ -NMR spectrum for compound 19 recorded in  $\text{CDCl}_3$

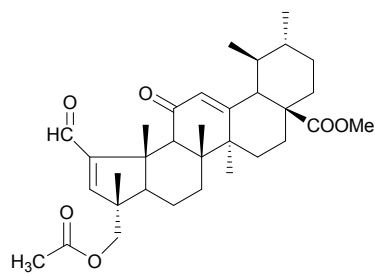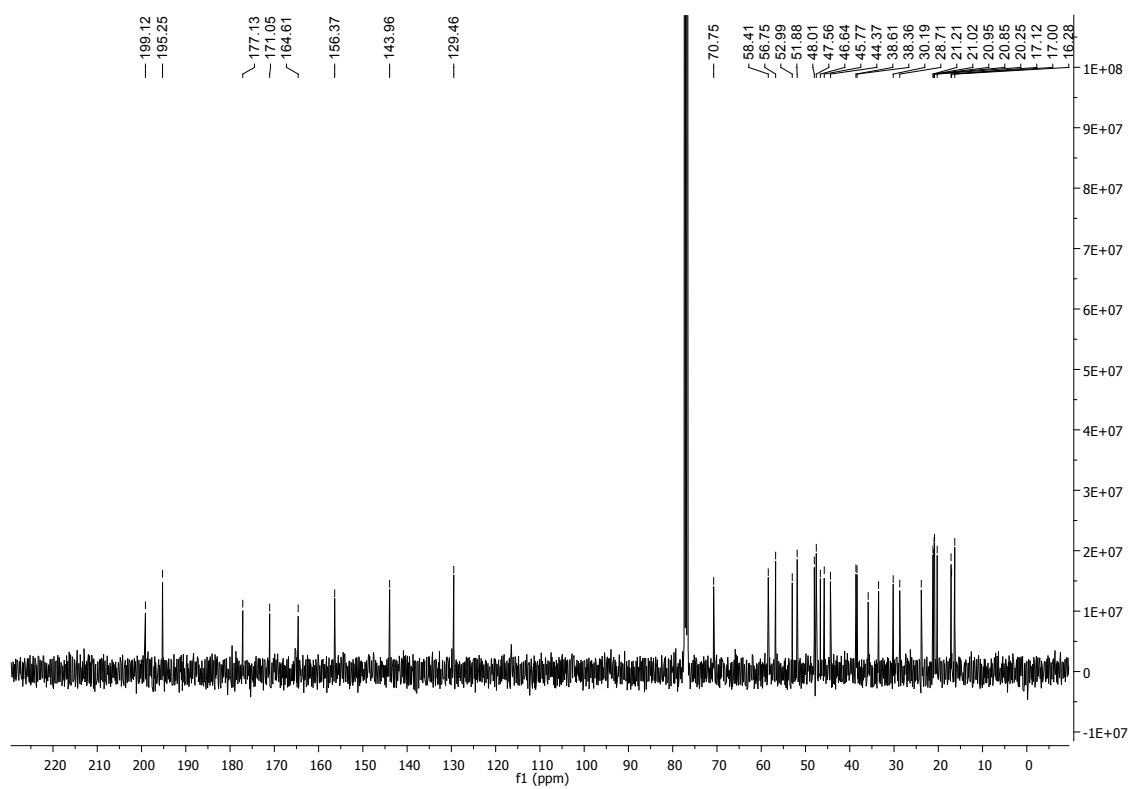

13.3 DEPT spectrum for compound 19 recorded in CDCl<sub>3</sub>

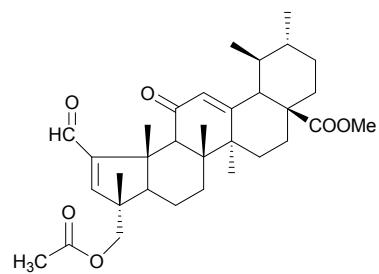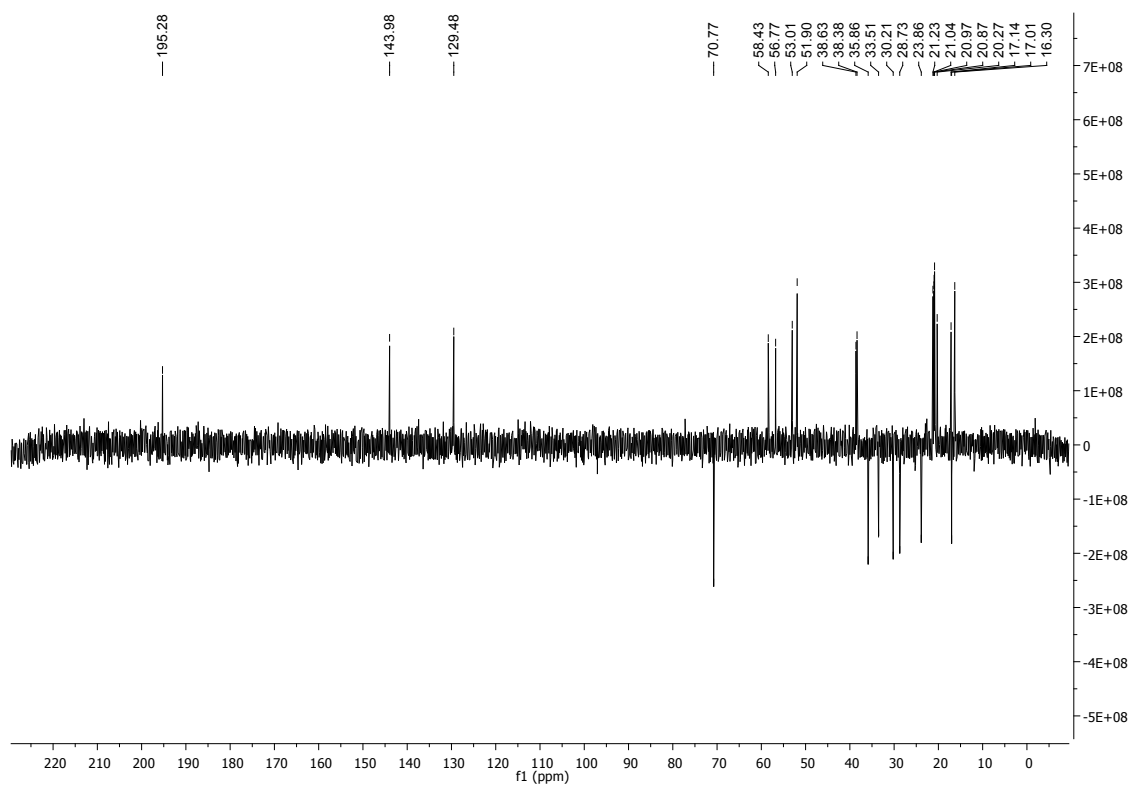

## 14. NMR data for compound 20

### 14.1 <sup>1</sup>H-NMR spectrum for compound 20 recorded in CDCl<sub>3</sub>

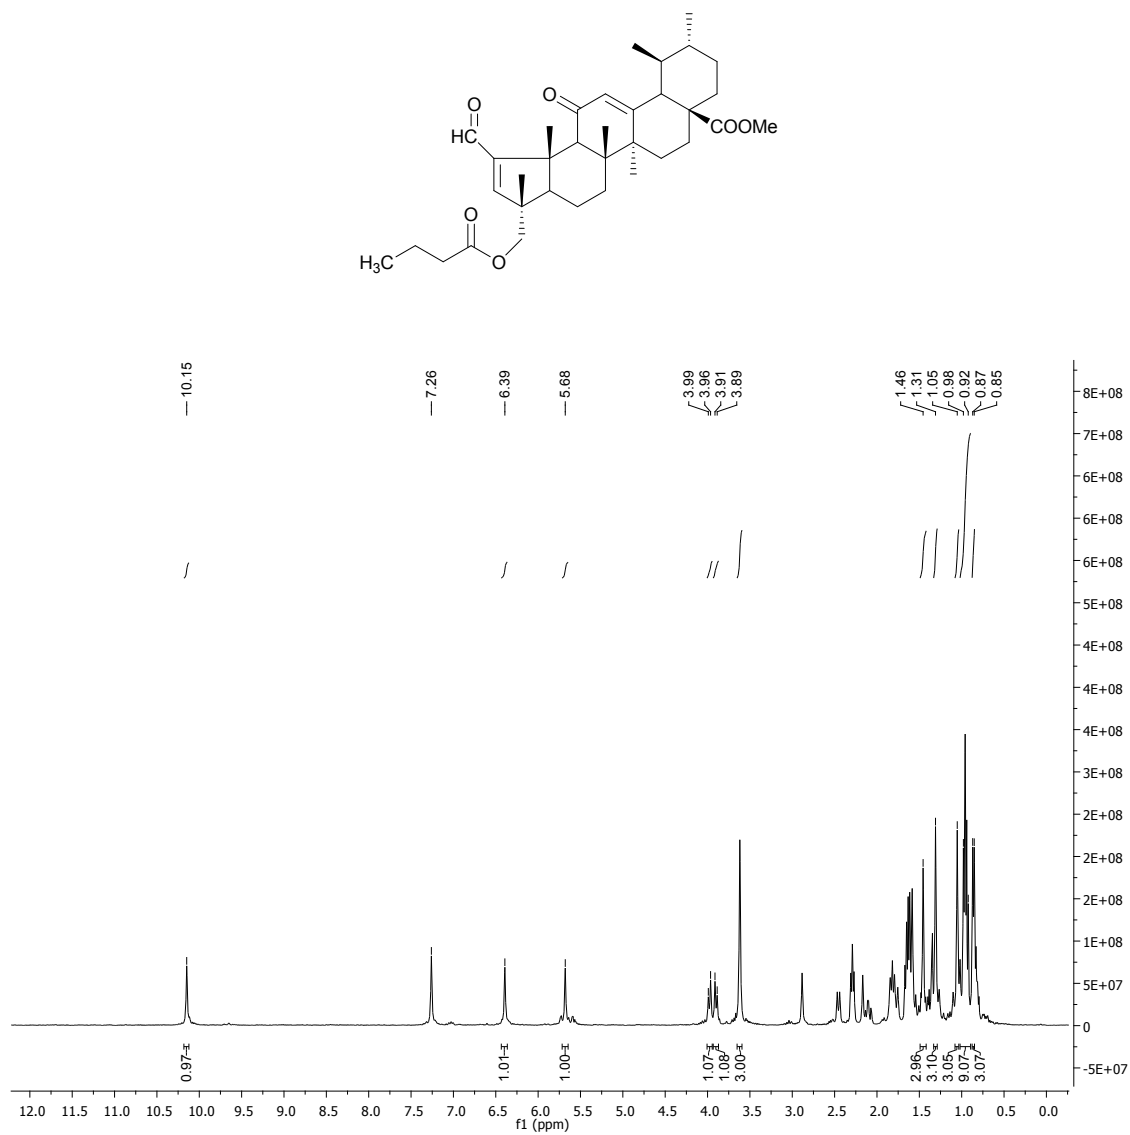

14.2  $^{13}\text{C}$ -NMR spectrum for compound 20 recorded in  $\text{CDCl}_3$

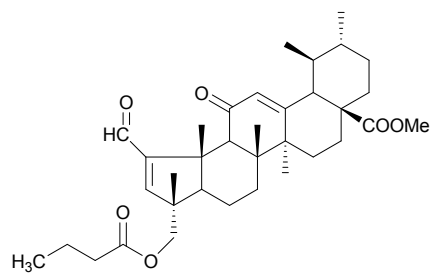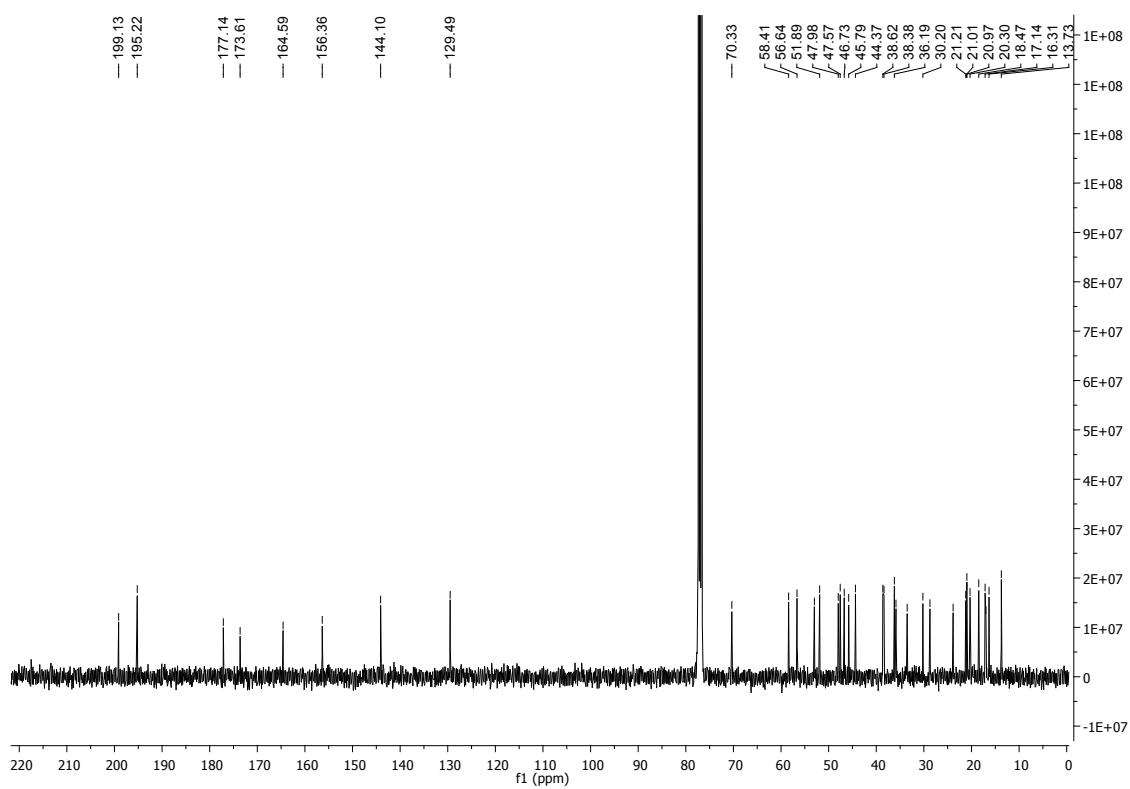

14.3 DEPT spectrum for compound 20 recorded in CDCl<sub>3</sub>

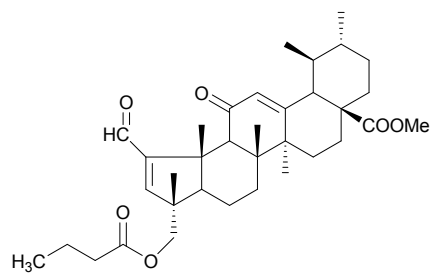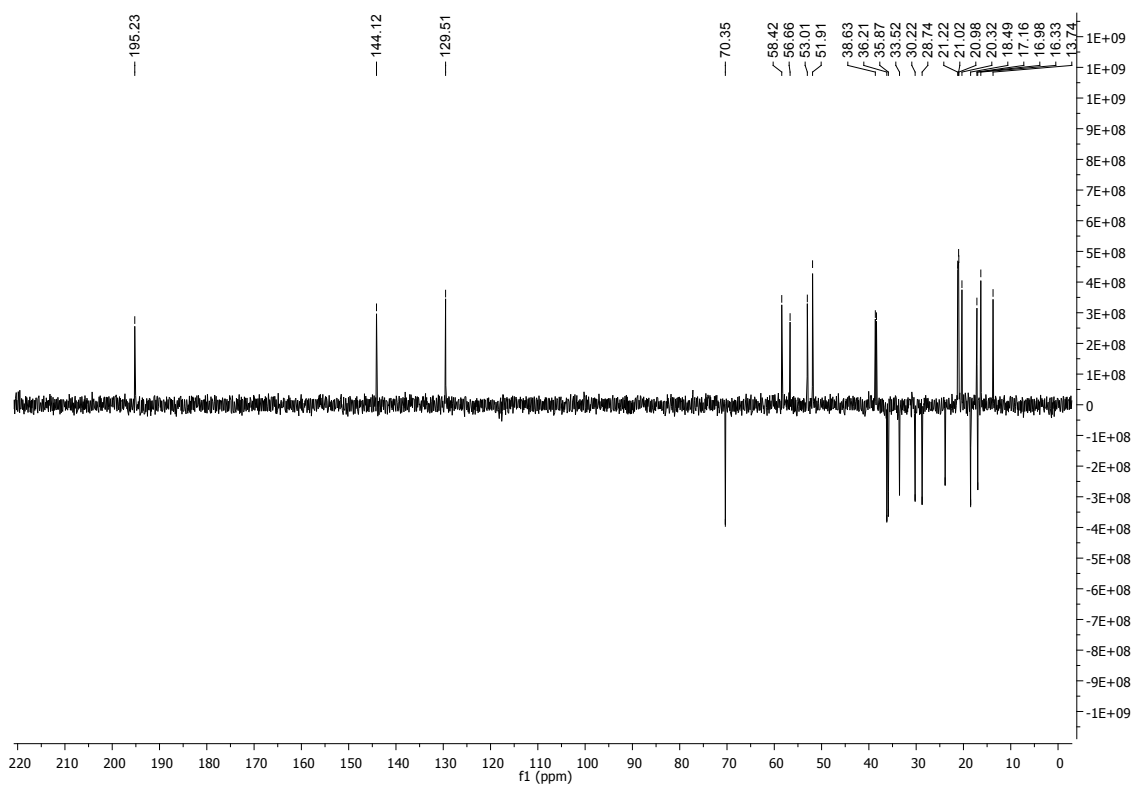

## 15. NMR data for compound 21

### 15.1 <sup>1</sup>H-NMR spectrum for compound 21 recorded in CDCl<sub>3</sub>

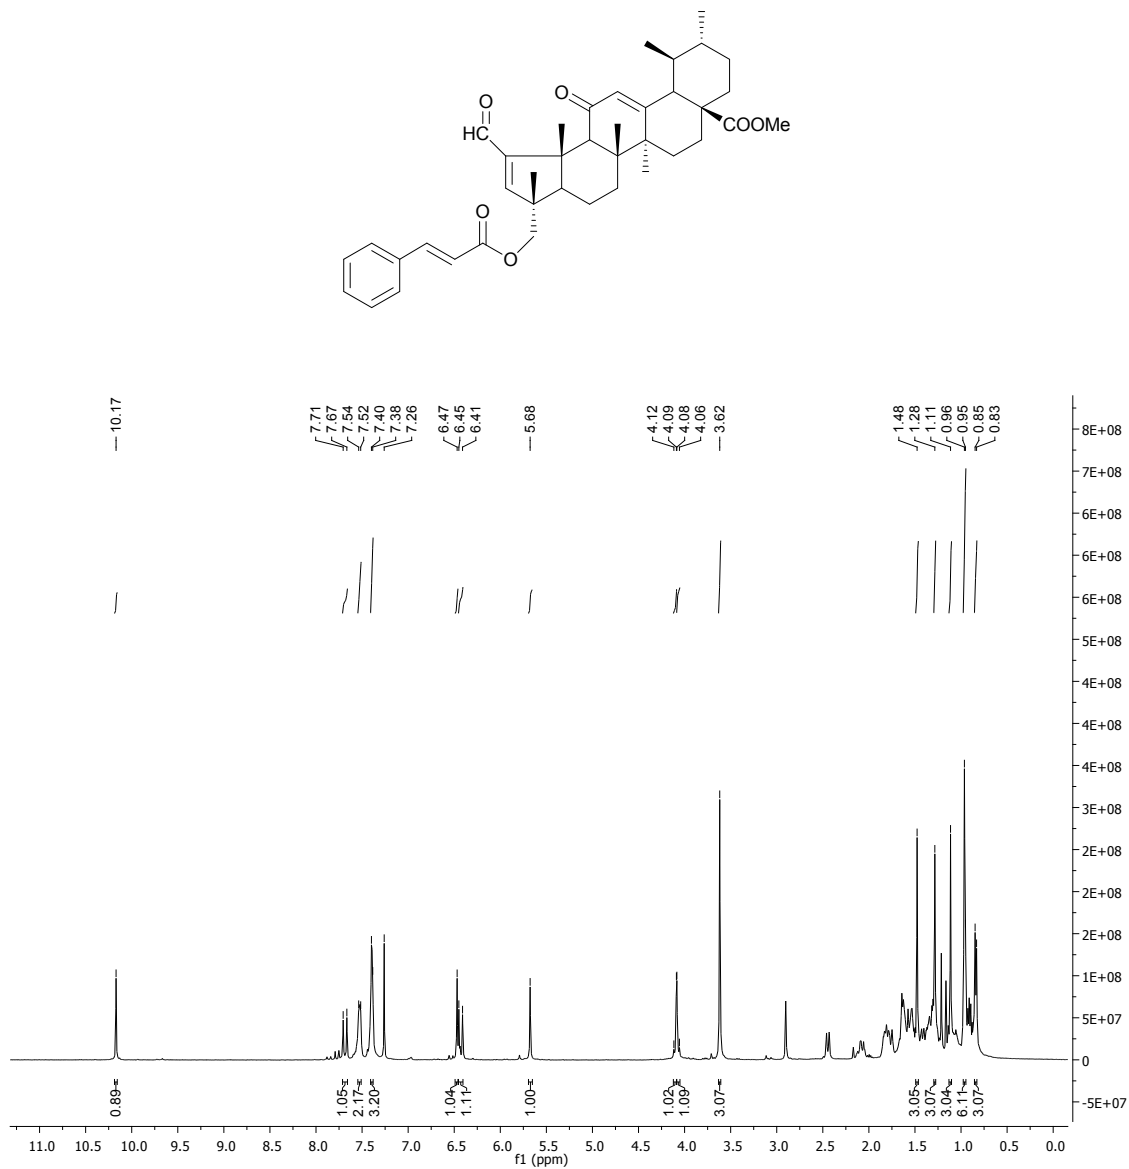



15.2  $^{13}\text{C}$ -NMR spectrum for compound 21 recorded in  $\text{CDCl}_3$

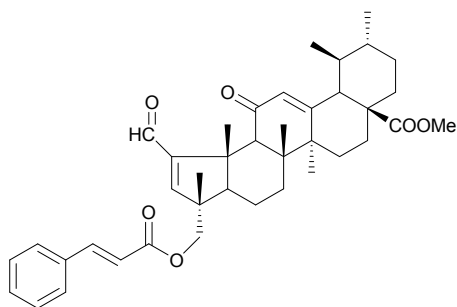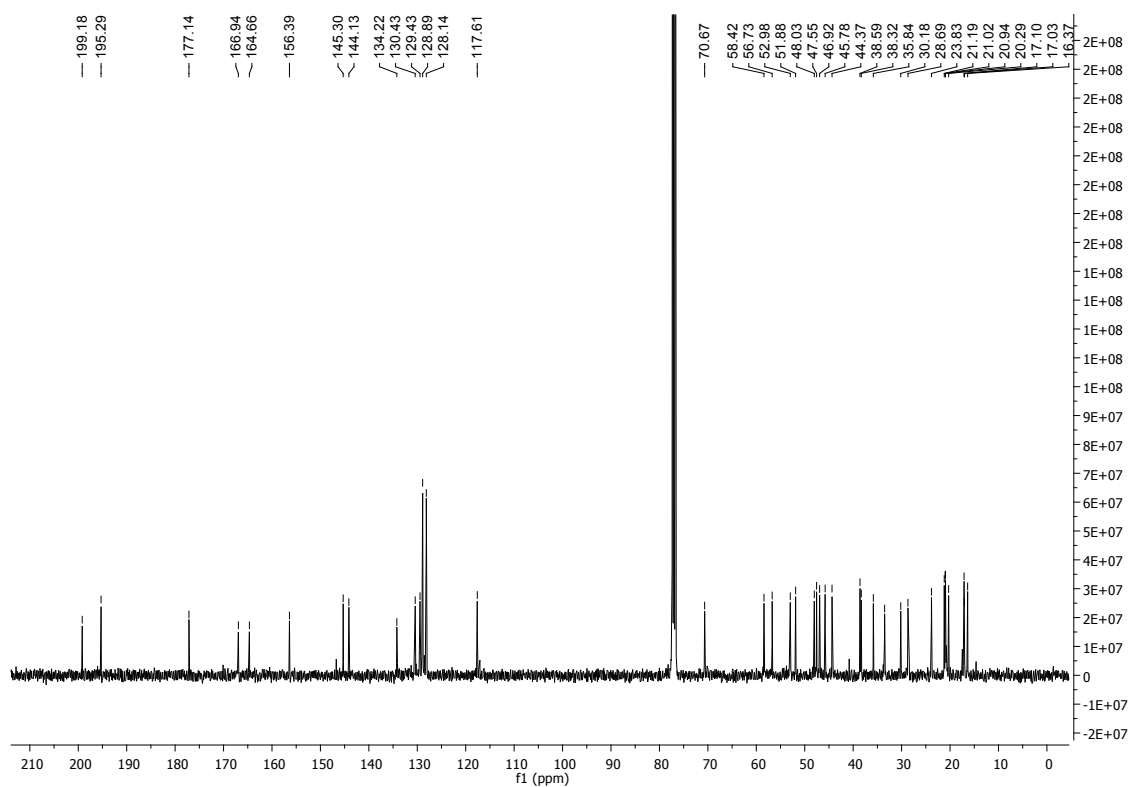

15.3 DEPT135 spectrum for compound 21 recorded in CDCl<sub>3</sub>

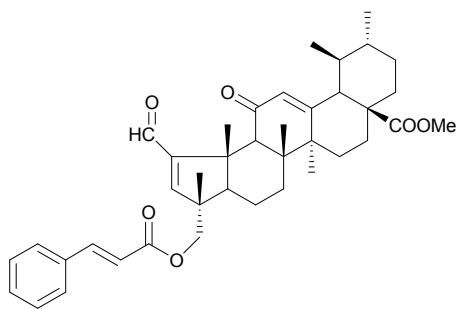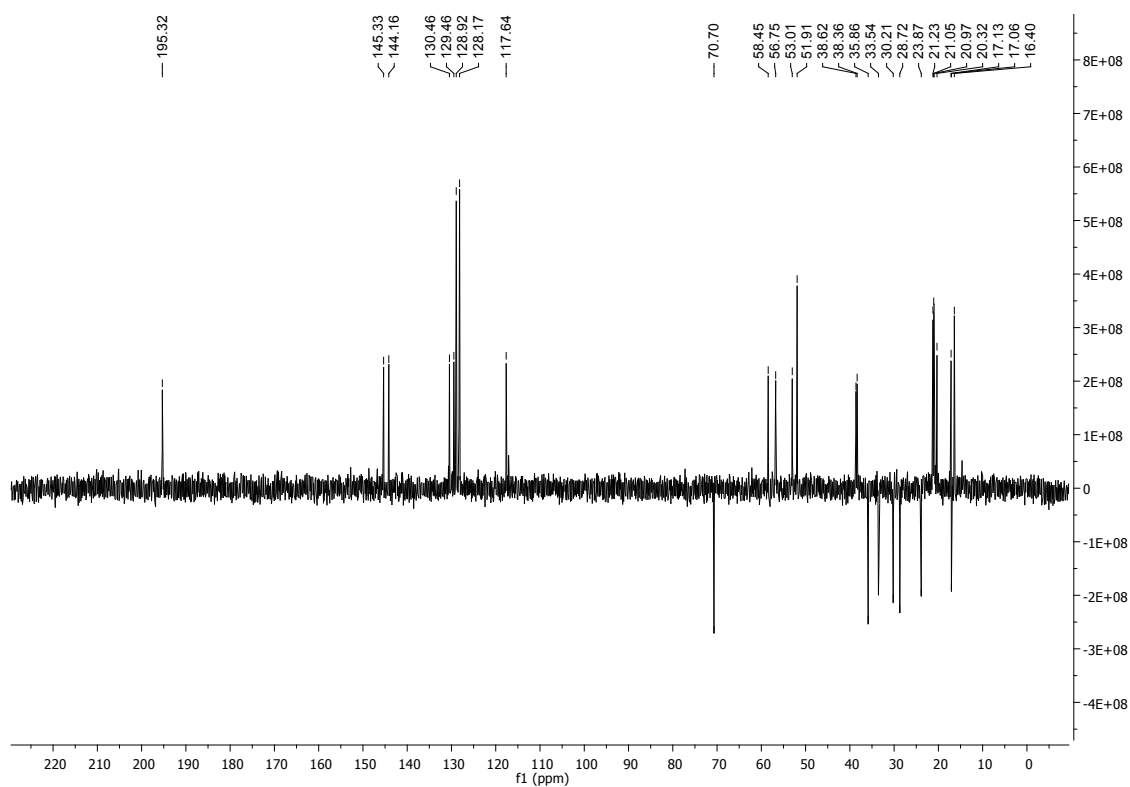

## 16. NMR data for compound 22

### 16.1 <sup>1</sup>H-NMR spectrum for compound 22 recorded in CDCl<sub>3</sub>

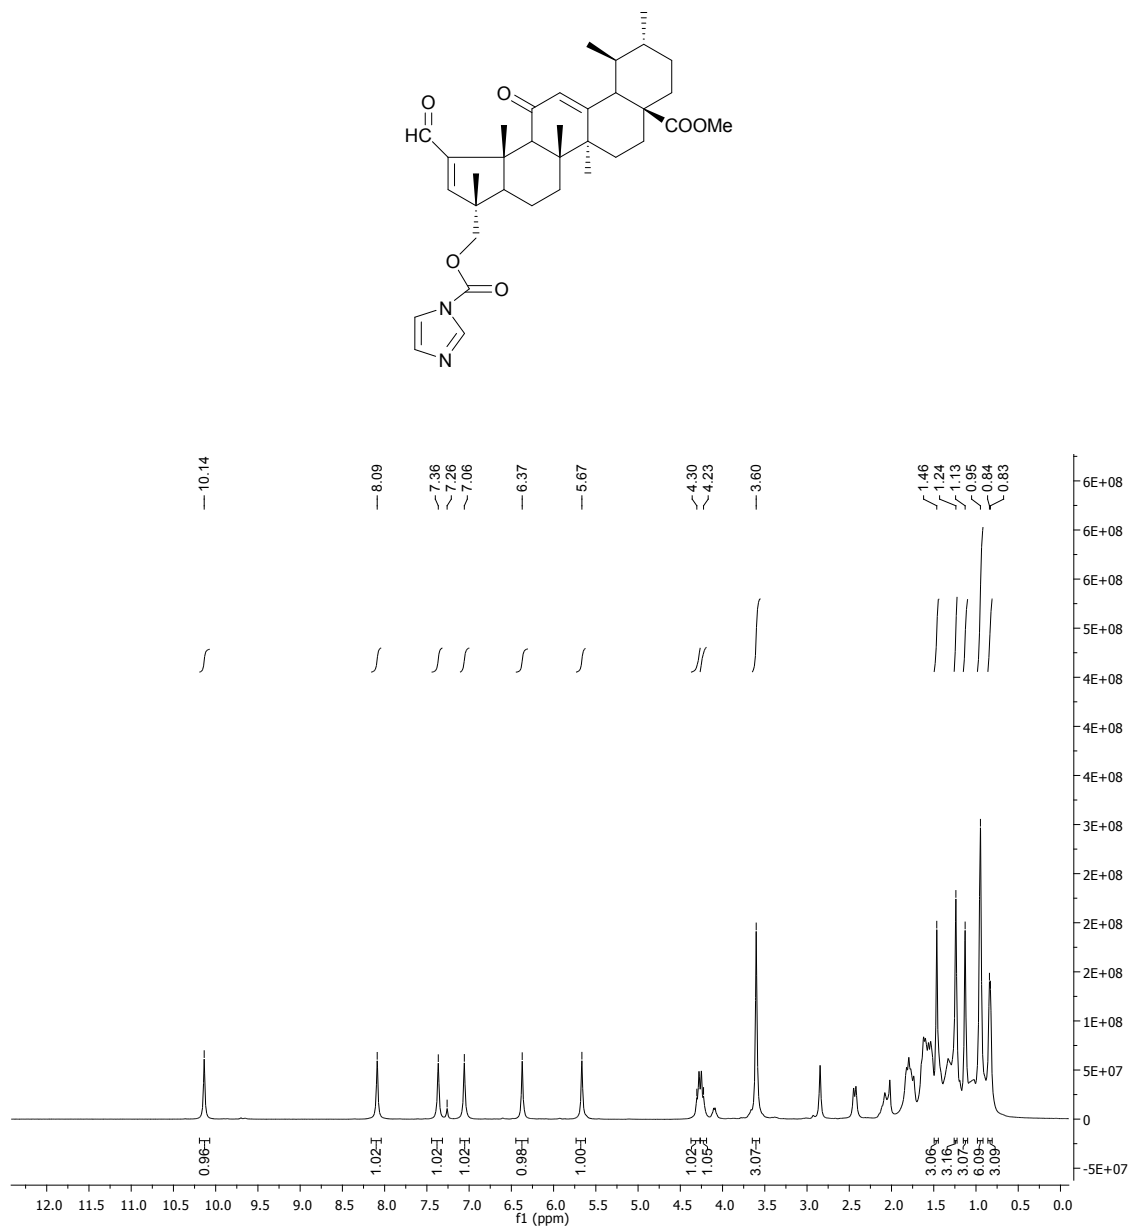

16.2 <sup>13</sup>C-NMR spectrum for compound 22 recorded in CDCl<sub>3</sub>

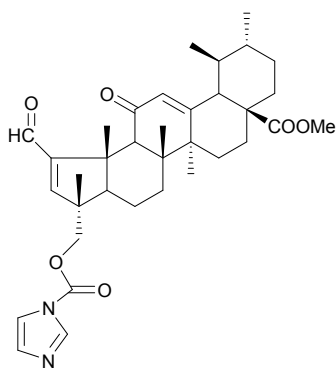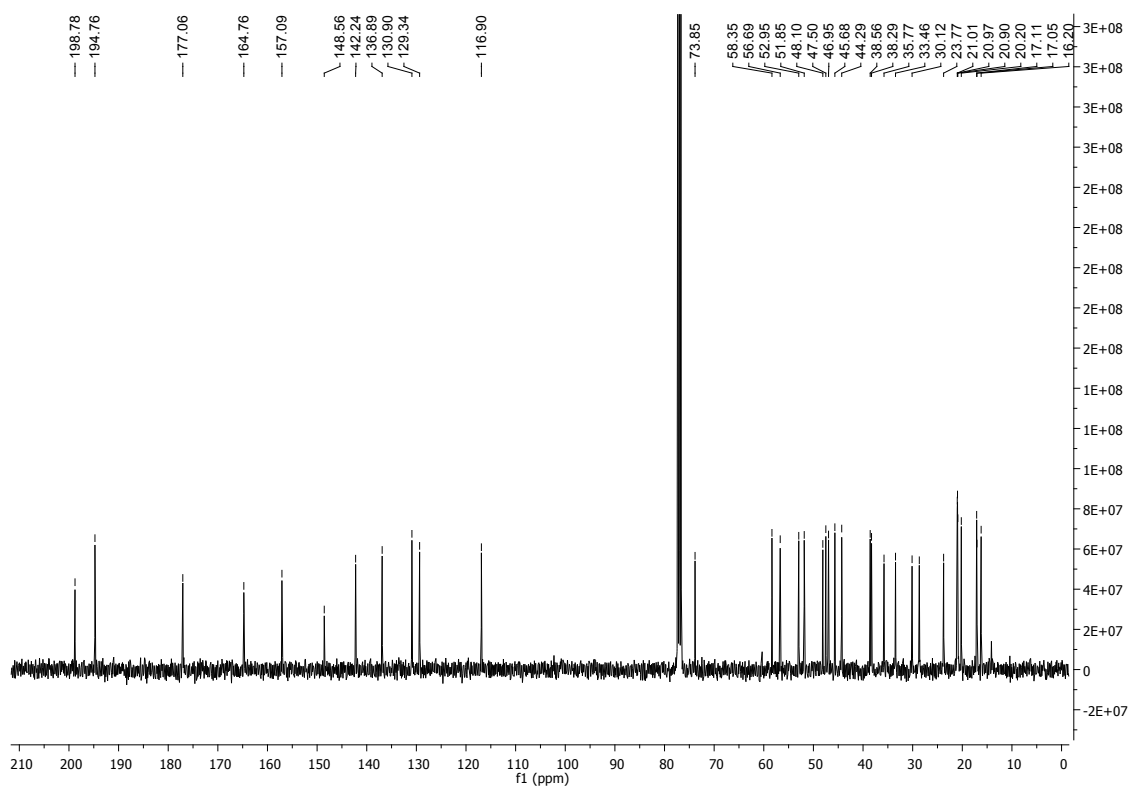

16.3 DEPT135 spectrum for compound 22 recorded in CDCl<sub>3</sub>

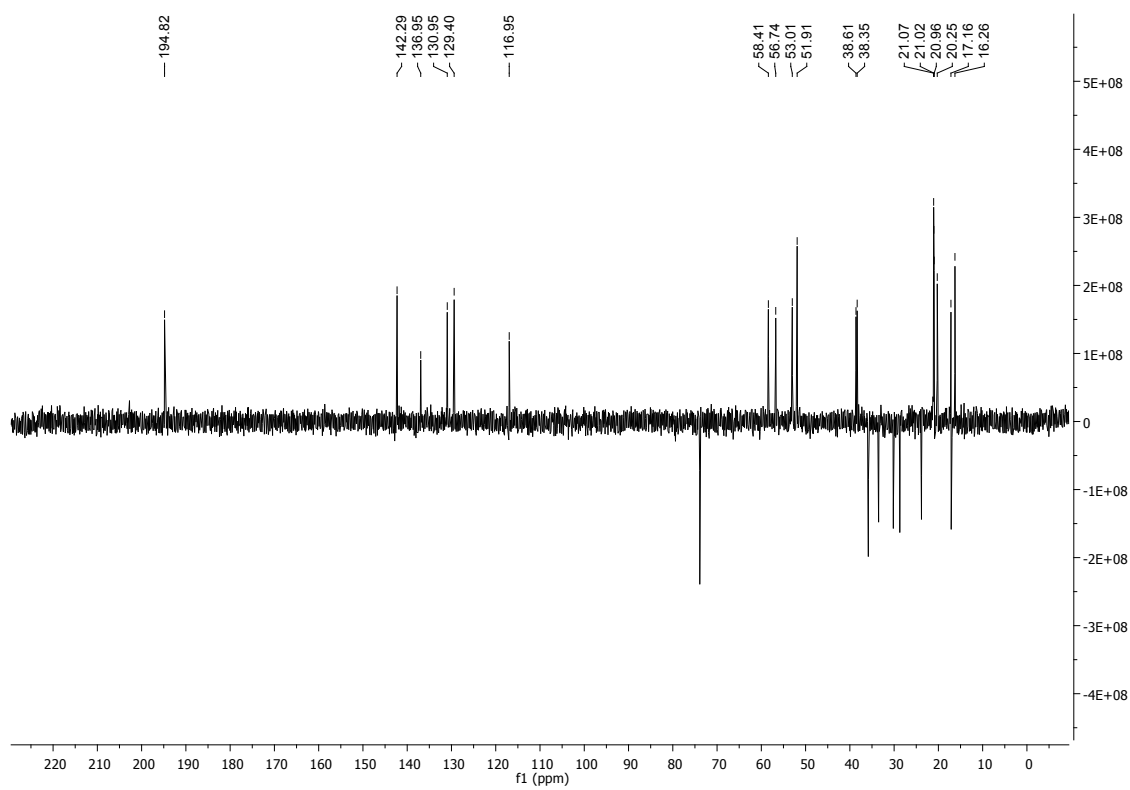

## 17. NMR data for compound 23

17.1 <sup>1</sup>H-NMR spectrum for compound 23 recorded in CDCl<sub>3</sub>

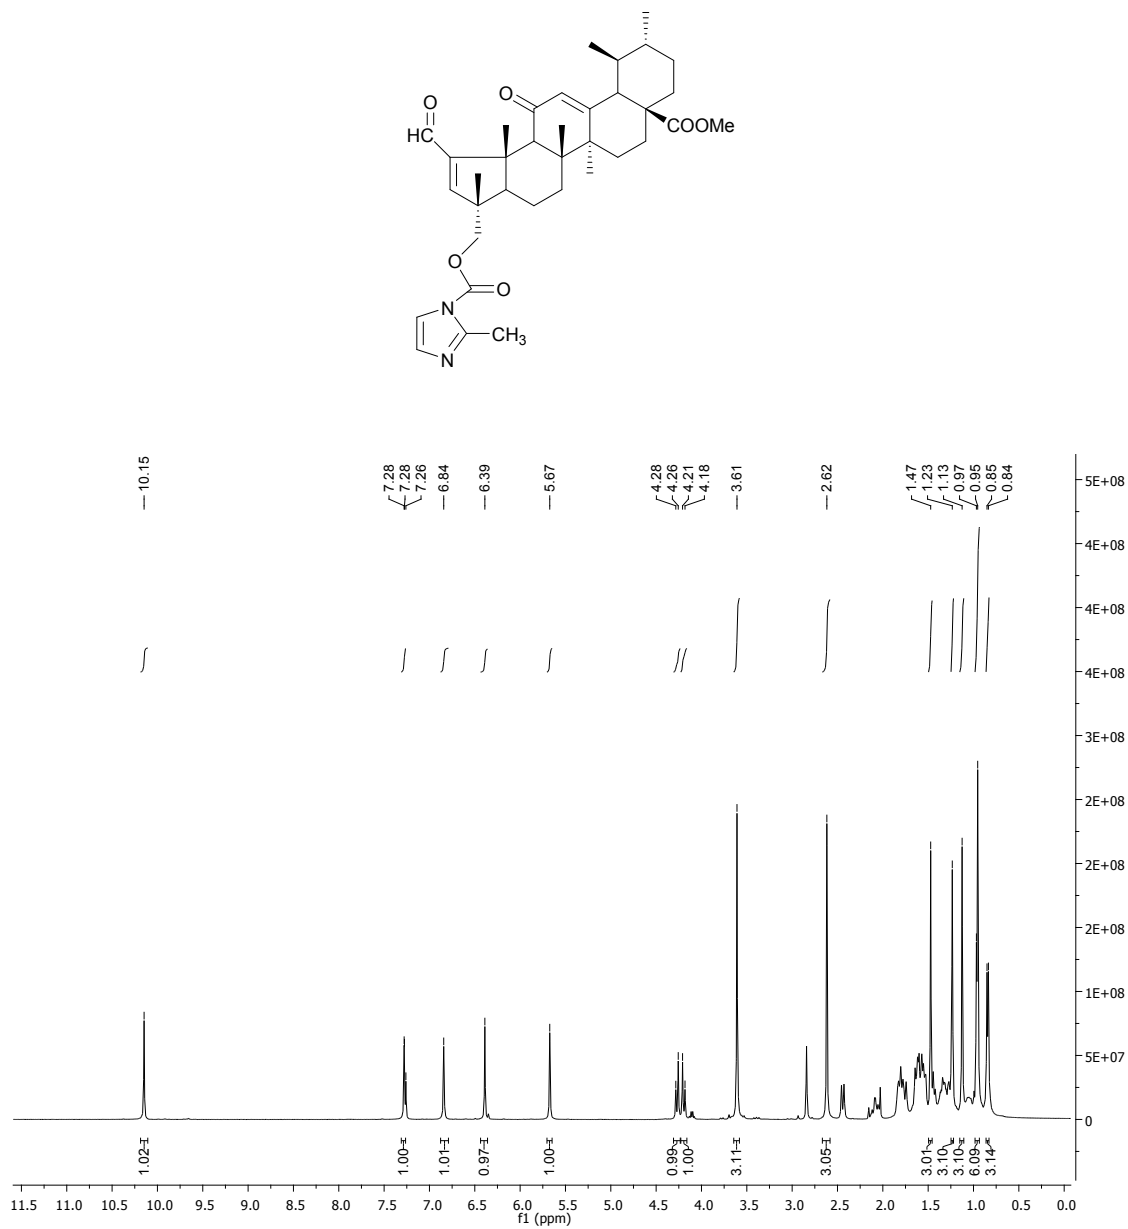

17.2  $^{13}\text{C}$ -NMR spectrum for compound 23 recorded in  $\text{CDCl}_3$

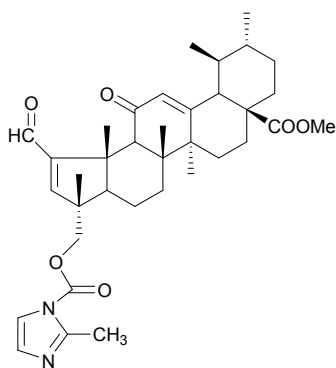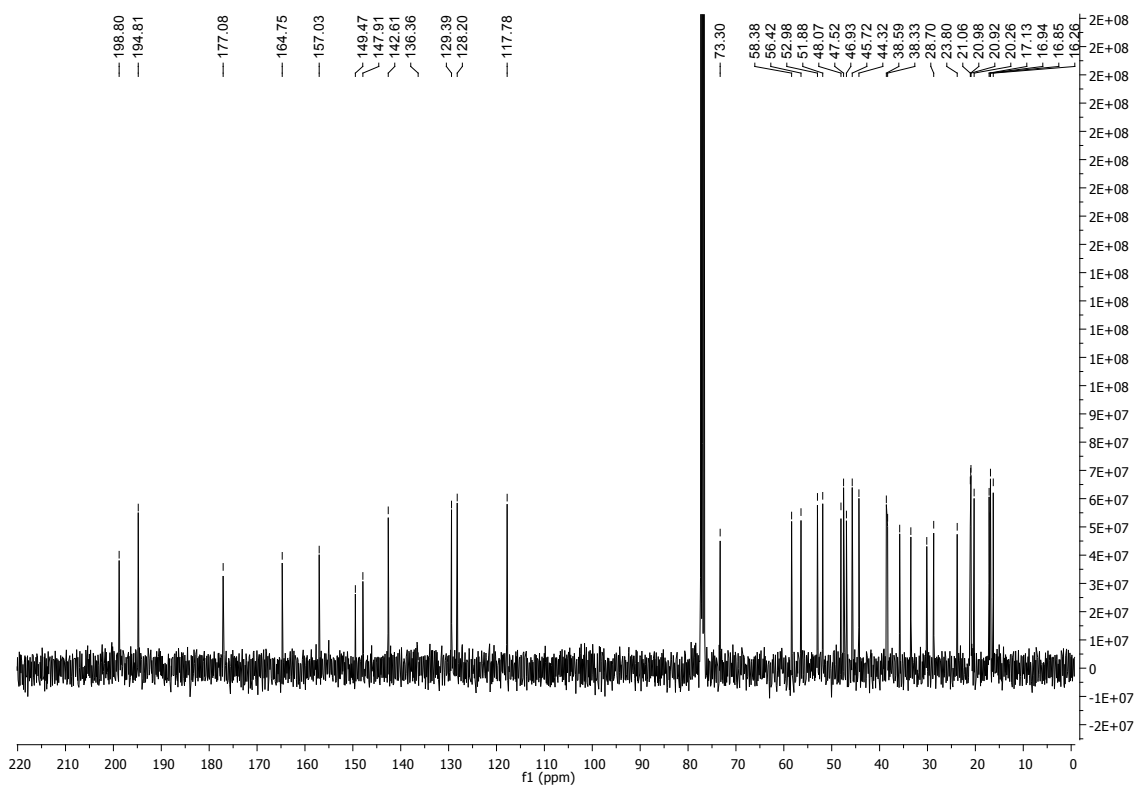

17.3 DEPT135 spectrum for compound 23 recorded in CDCl<sub>3</sub>

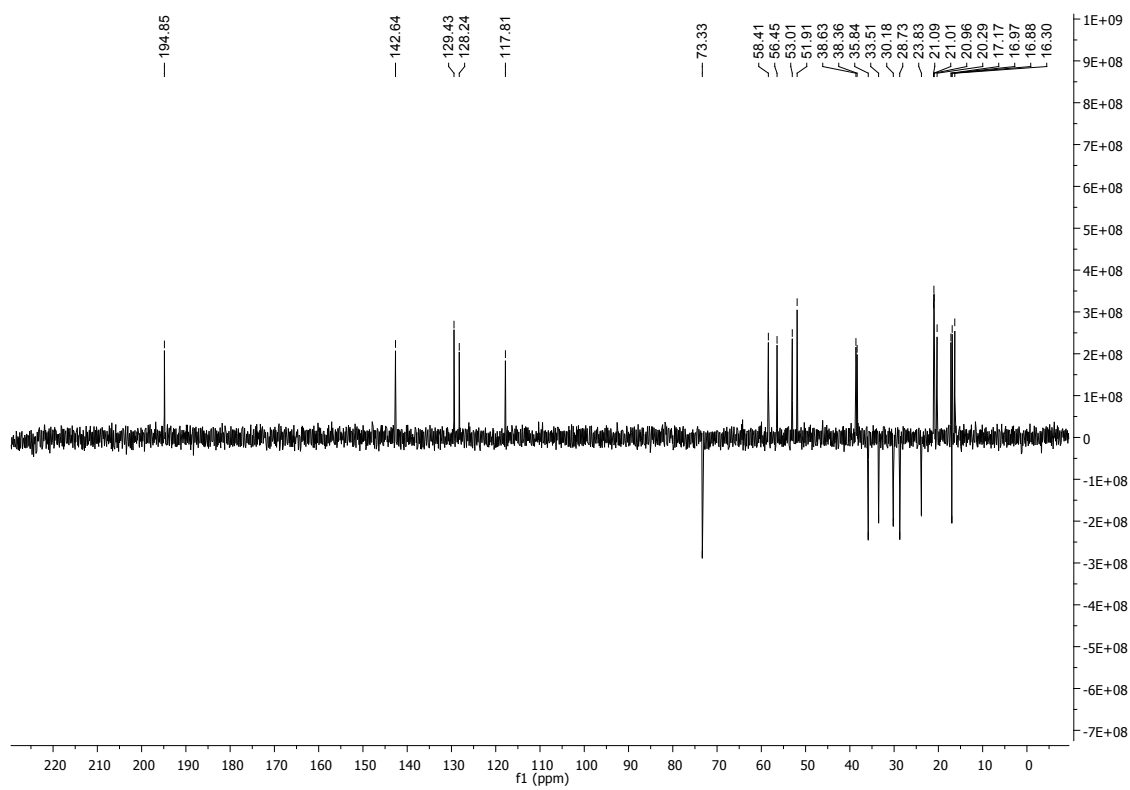



## 18. NMR data for compound 24

18.1 <sup>1</sup>H-NMR spectrum for compound 24 recorded in CDCl<sub>3</sub>

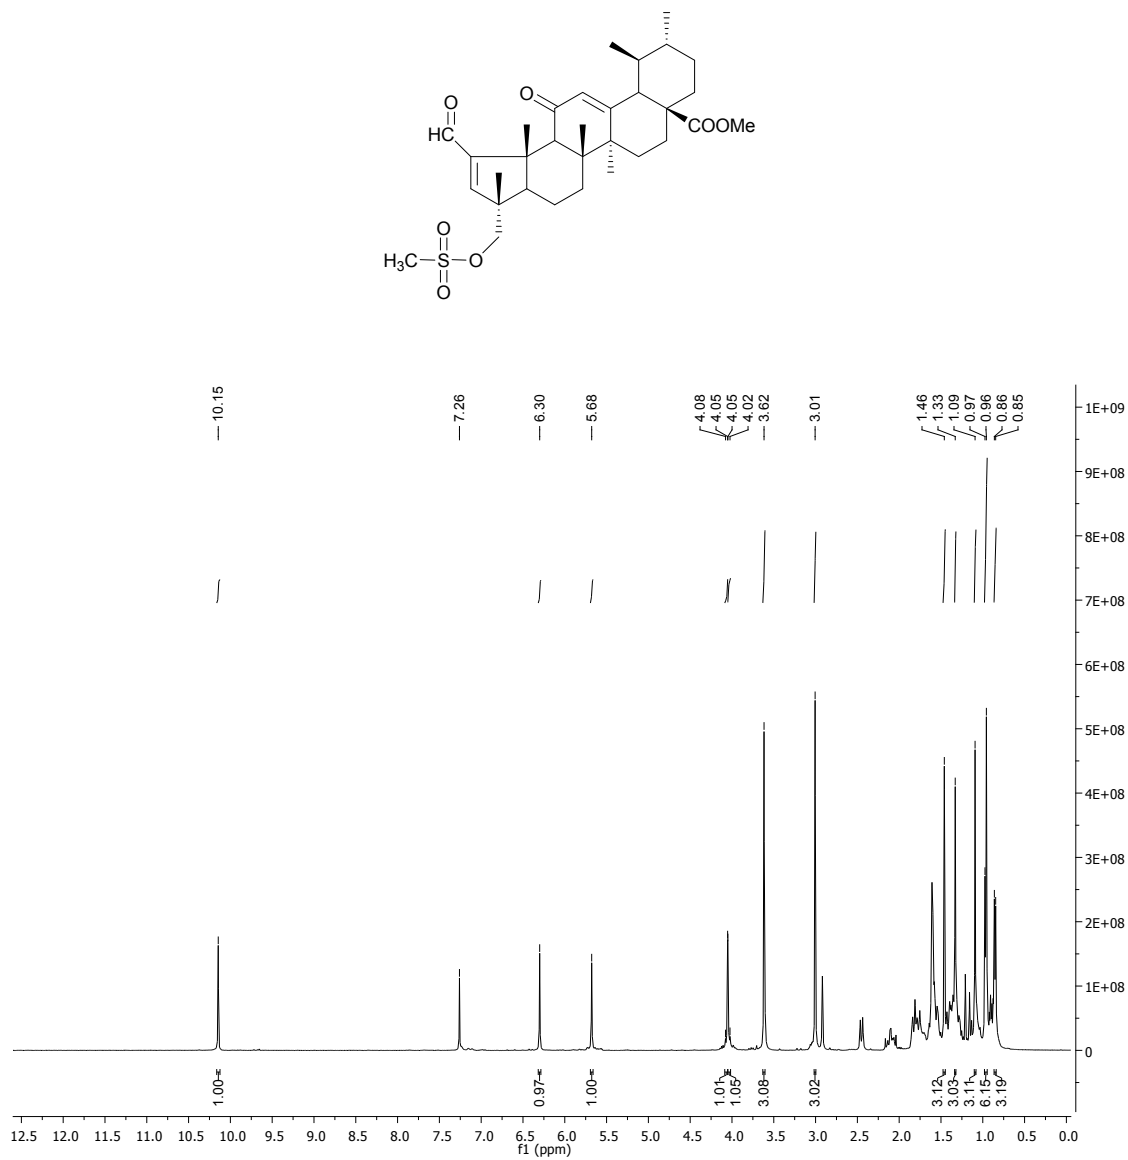

18.2  $^{13}\text{C}$ -NMR spectrum for compound 24 recorded in  $\text{CDCl}_3$

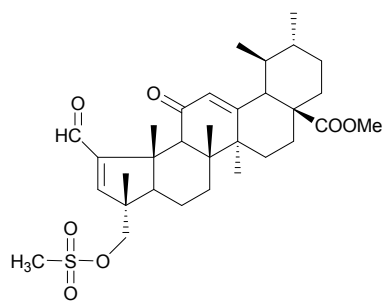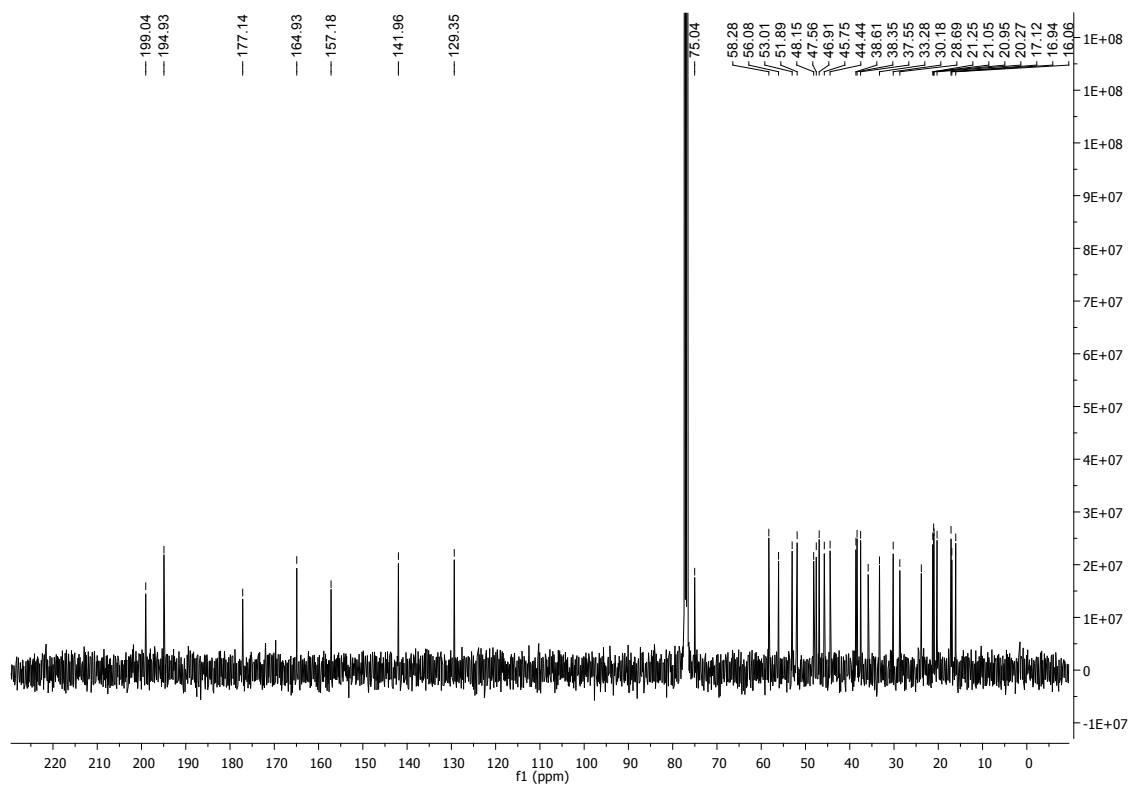

18.3 DEPT135 spectrum for compound 24 recorded in CDCl<sub>3</sub>

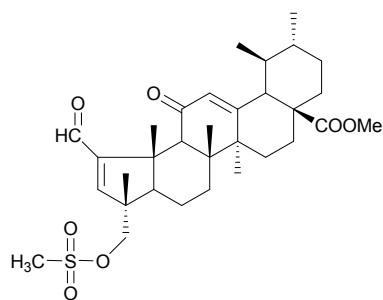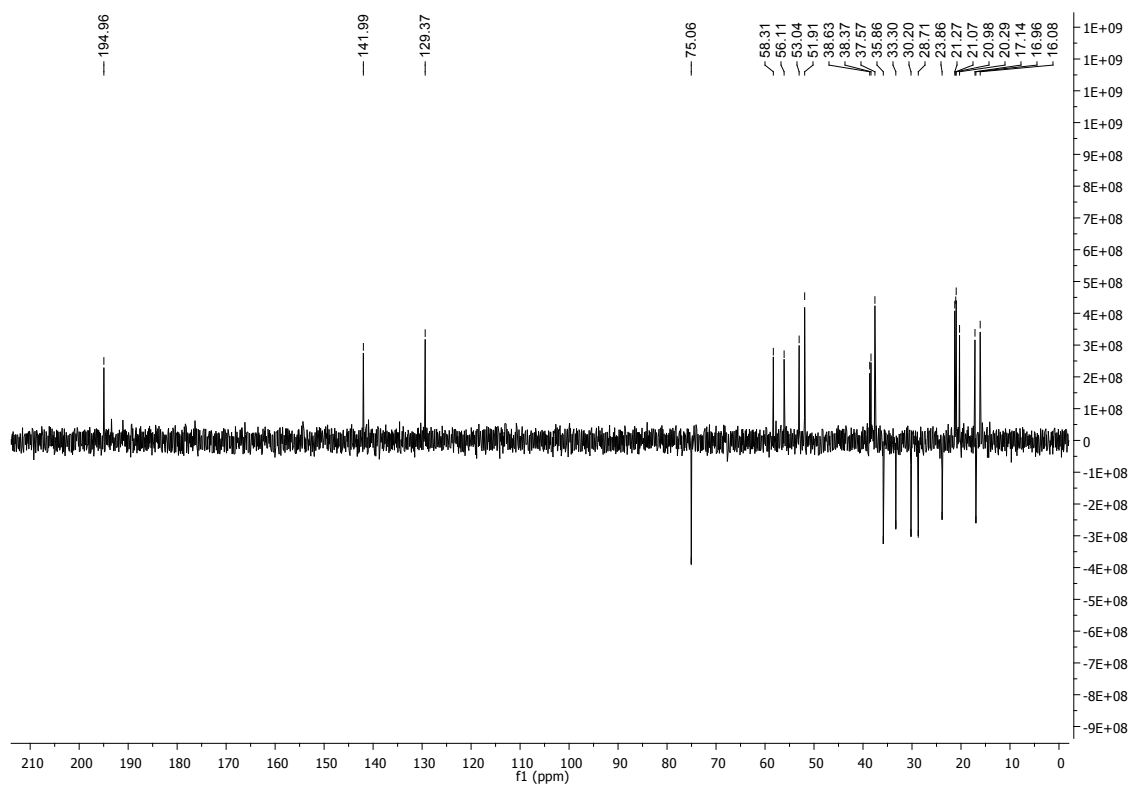

## 19. NMR data for compound 25

19.1 <sup>1</sup>H-NMR spectrum for compound 25 recorded in CDCl<sub>3</sub>

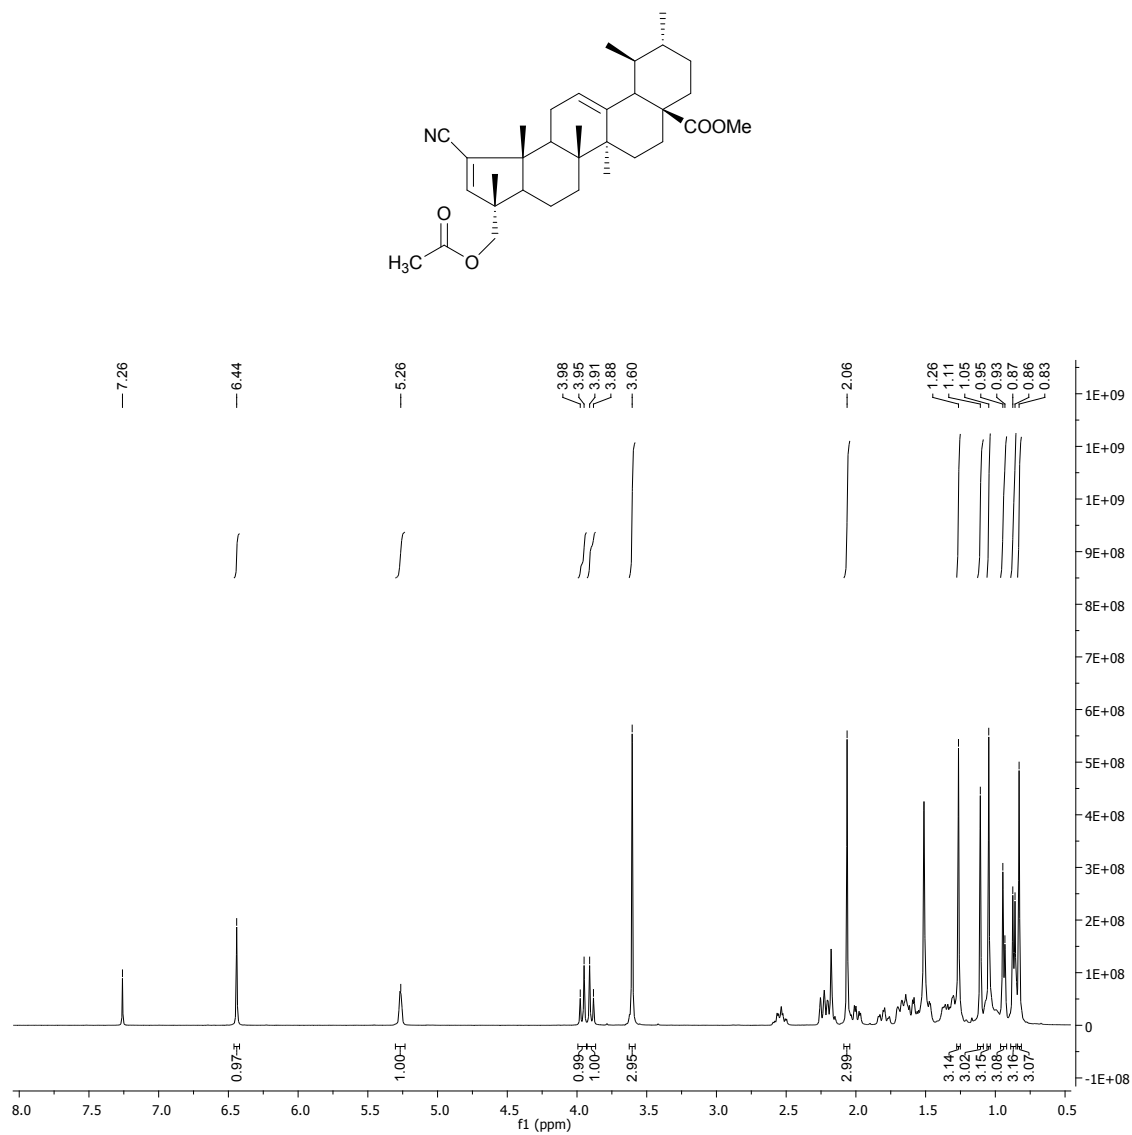

19.2  $^{13}\text{C}$ -NMR spectrum for compound 25 recorded in  $\text{CDCl}_3$

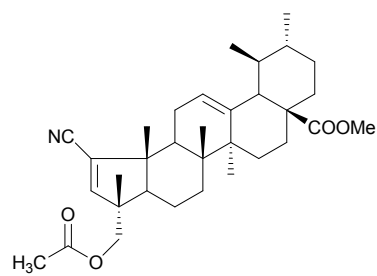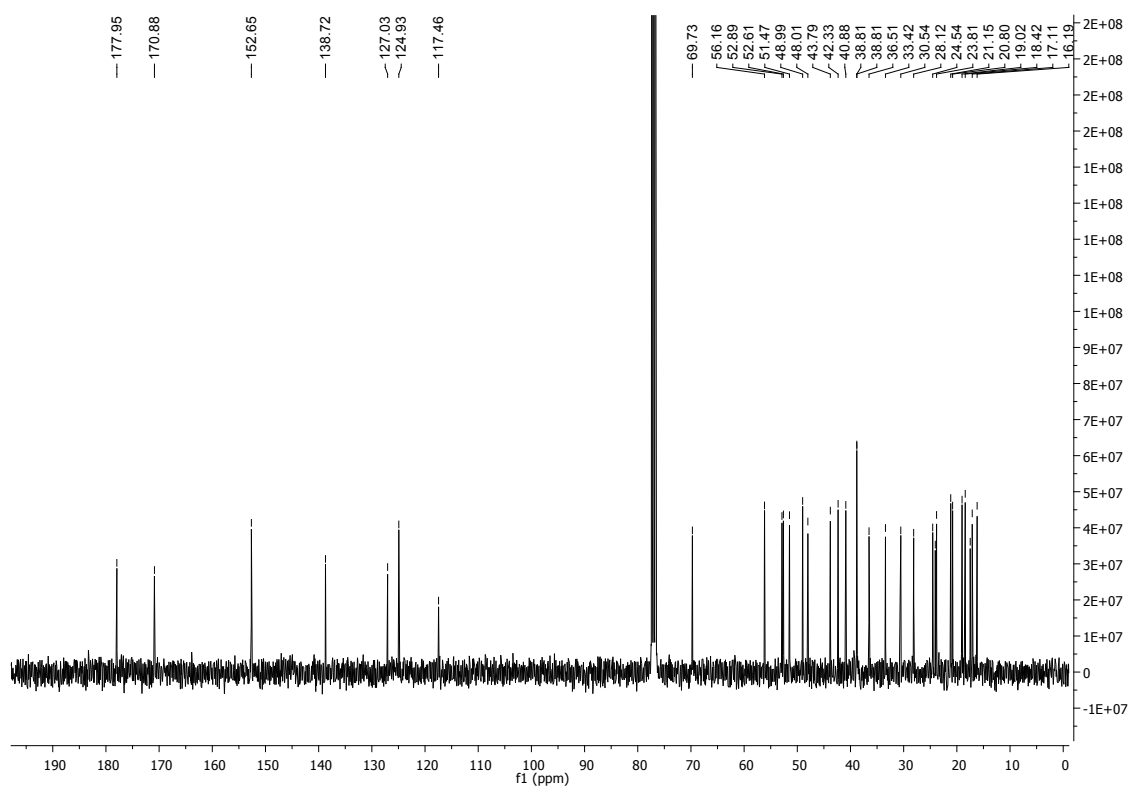

19.3 DEPT135 spectrum for compound 25 recorded in CDCl<sub>3</sub>

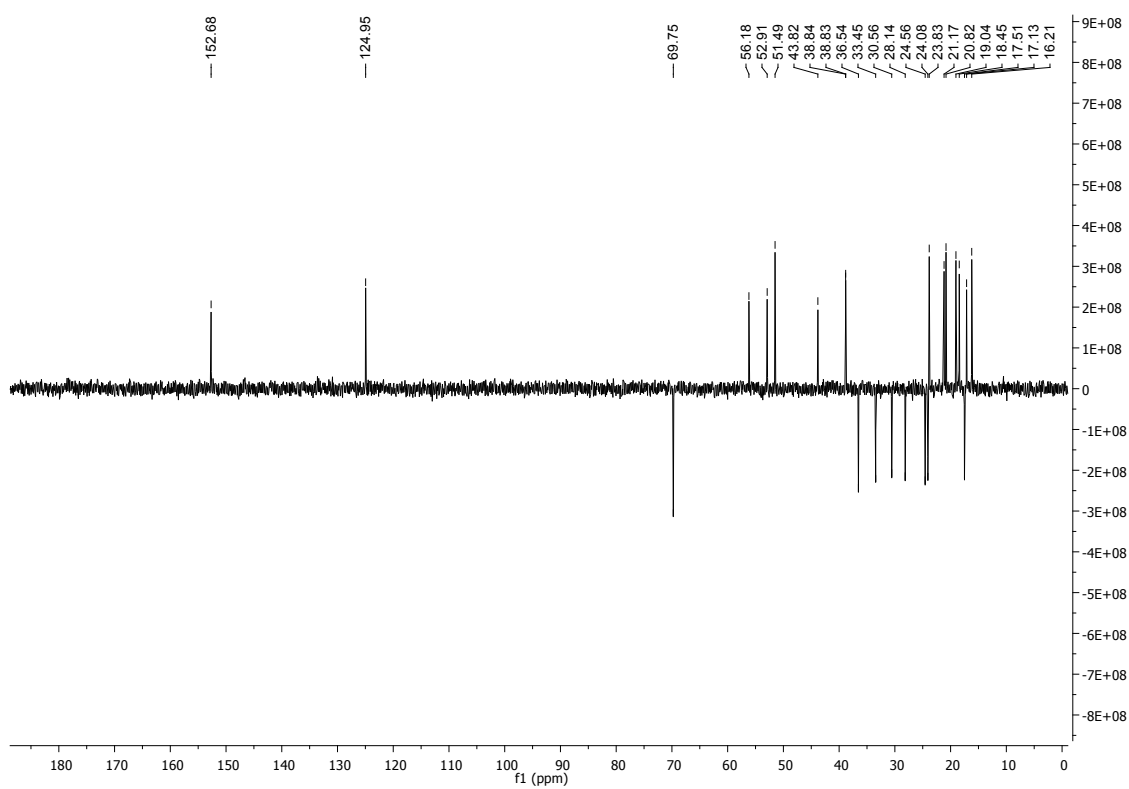

## 20. NMR data for compound 26

### 20.1 $^1\text{H}$ -NMR spectrum for compound 26 recorded in $\text{CDCl}_3$

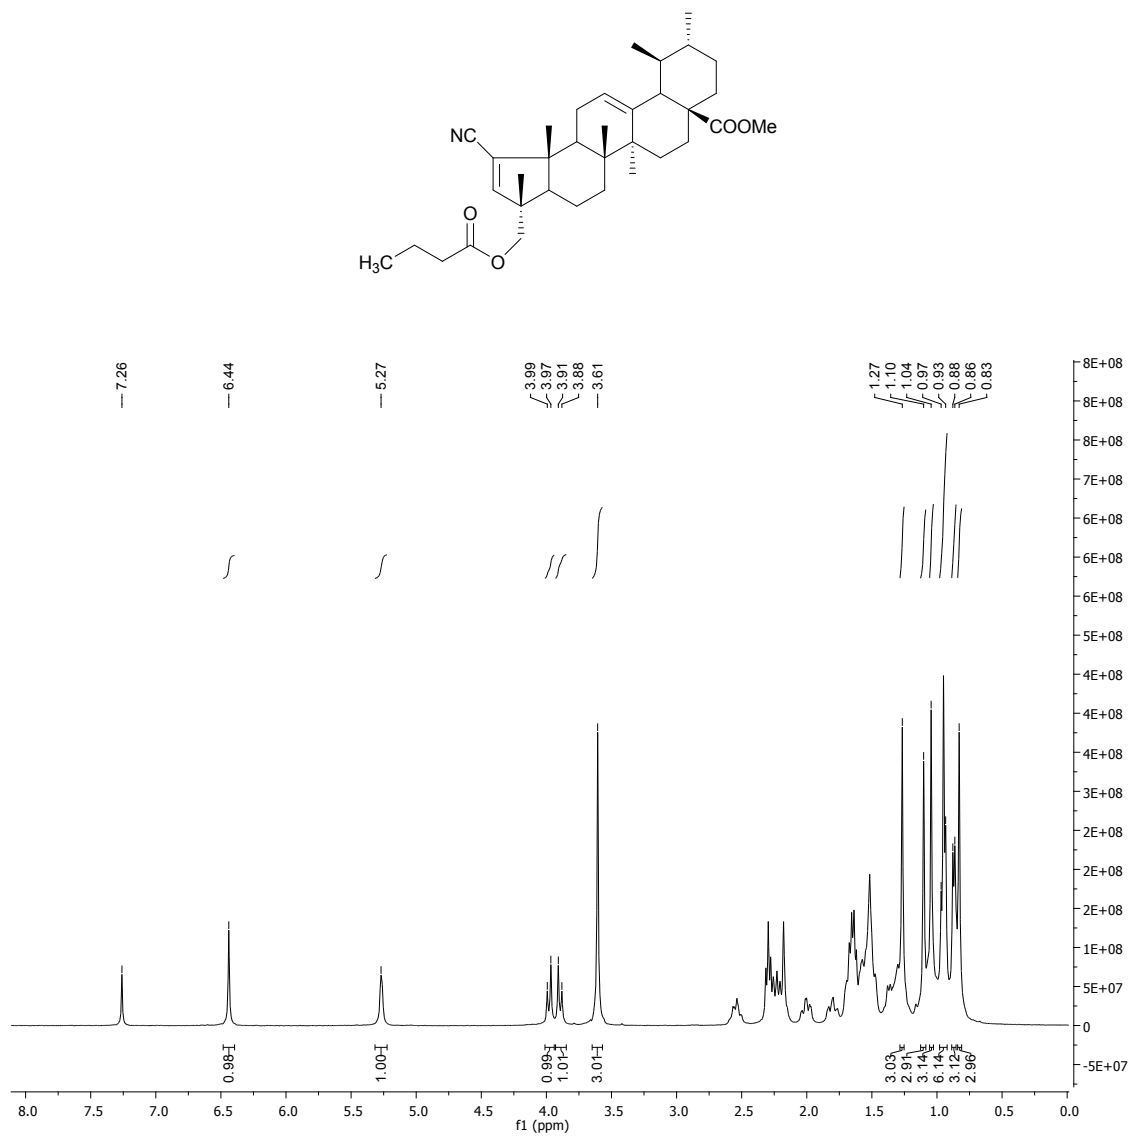

20.2  $^{13}\text{C}$ -NMR spectrum for compound 26 recorded in  $\text{CDCl}_3$

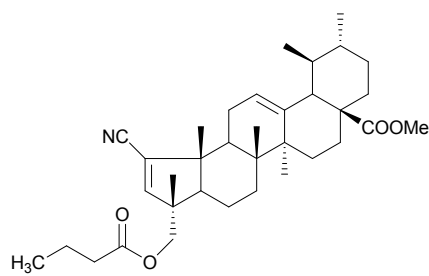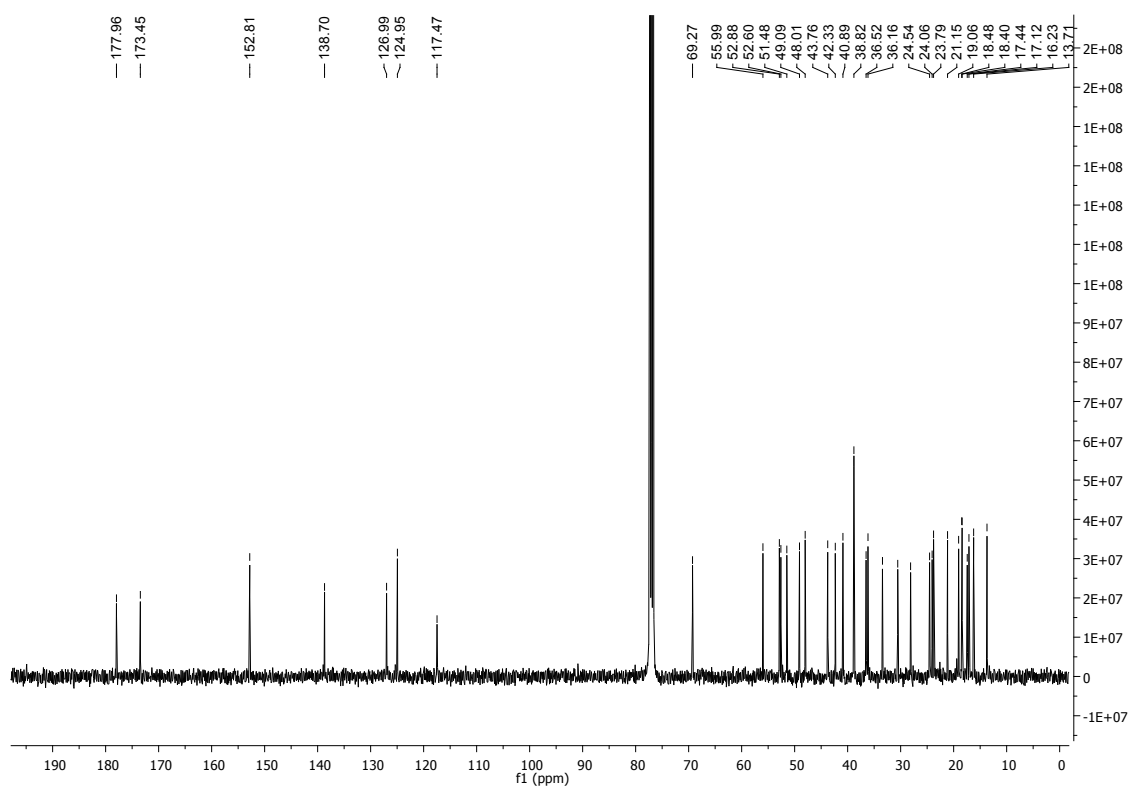



20.3 DEPT135 spectrum for compound 26 recorded in CDCl<sub>3</sub>

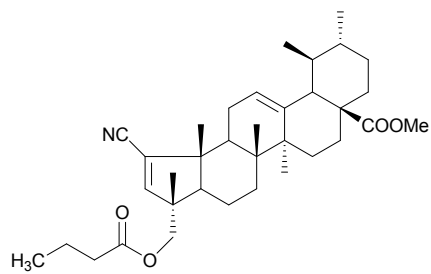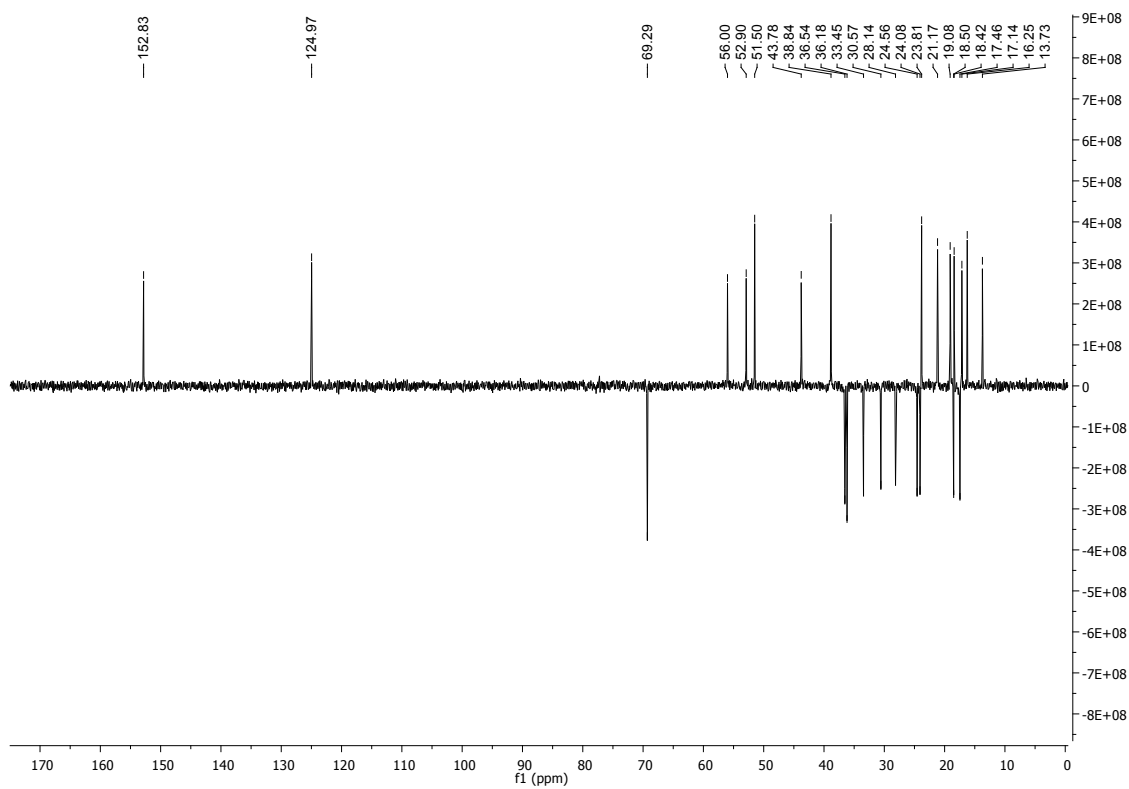

## 21. NMR data for compound 27

### 21.1 <sup>1</sup>H-NMR spectrum for compound 27 recorded in CDCl<sub>3</sub>

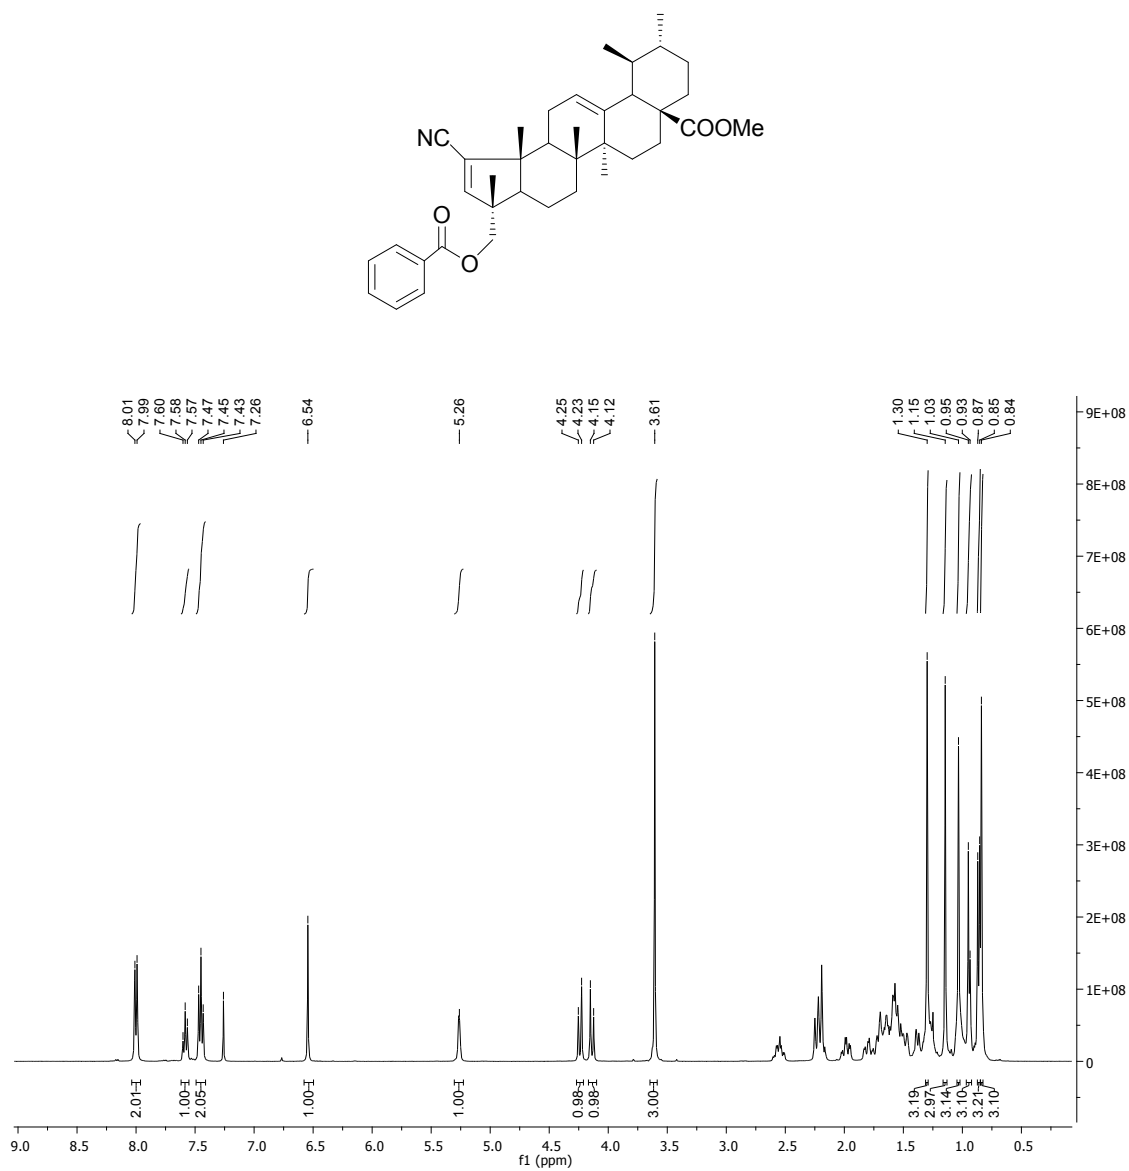

21.2  $^{13}\text{C}$ -NMR spectrum for compound 27 recorded in  $\text{CDCl}_3$

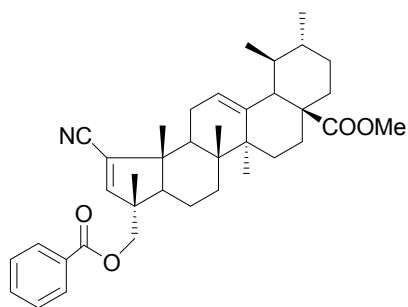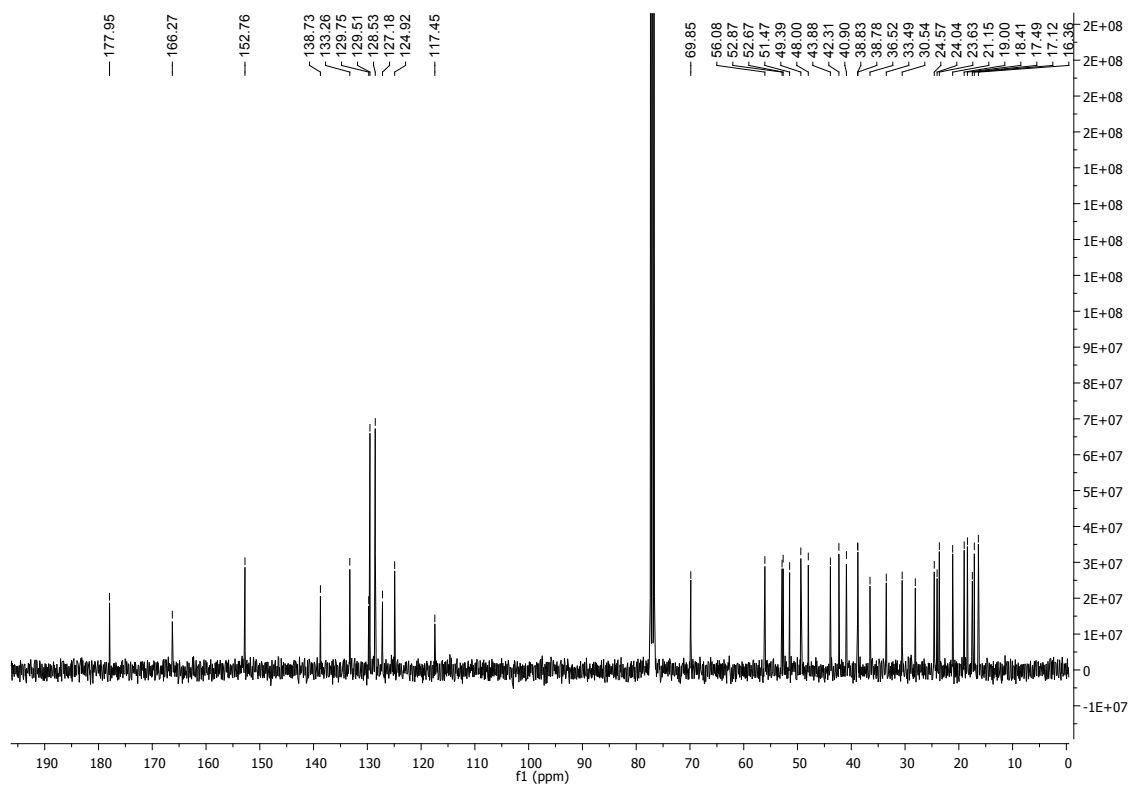

21.3 DEPT135 spectrum for compound 27 recorded in CDCl<sub>3</sub>

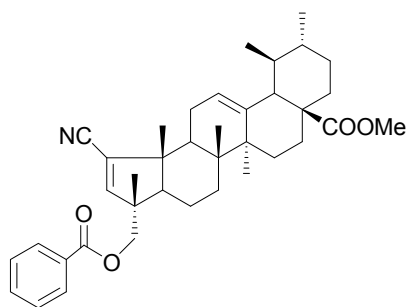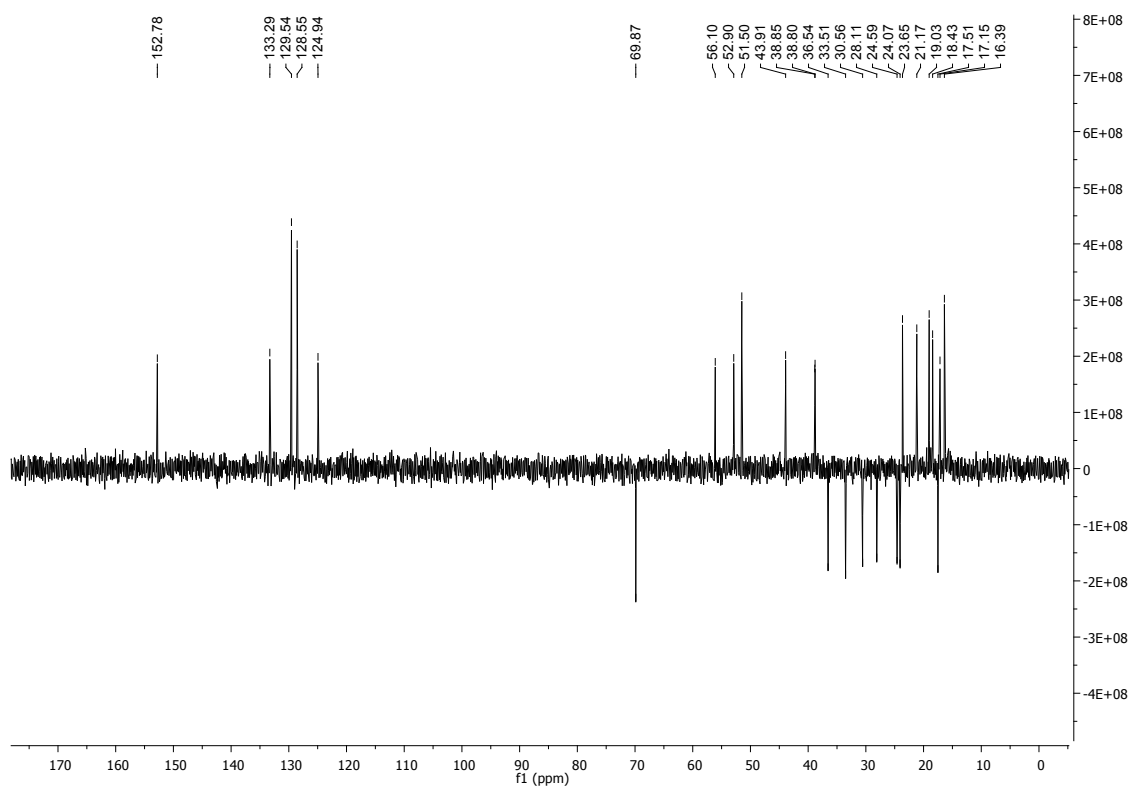

## 22. NMR data for compound 28

### 22.1 <sup>1</sup>H-NMR spectrum for compound 28 recorded in CDCl<sub>3</sub>

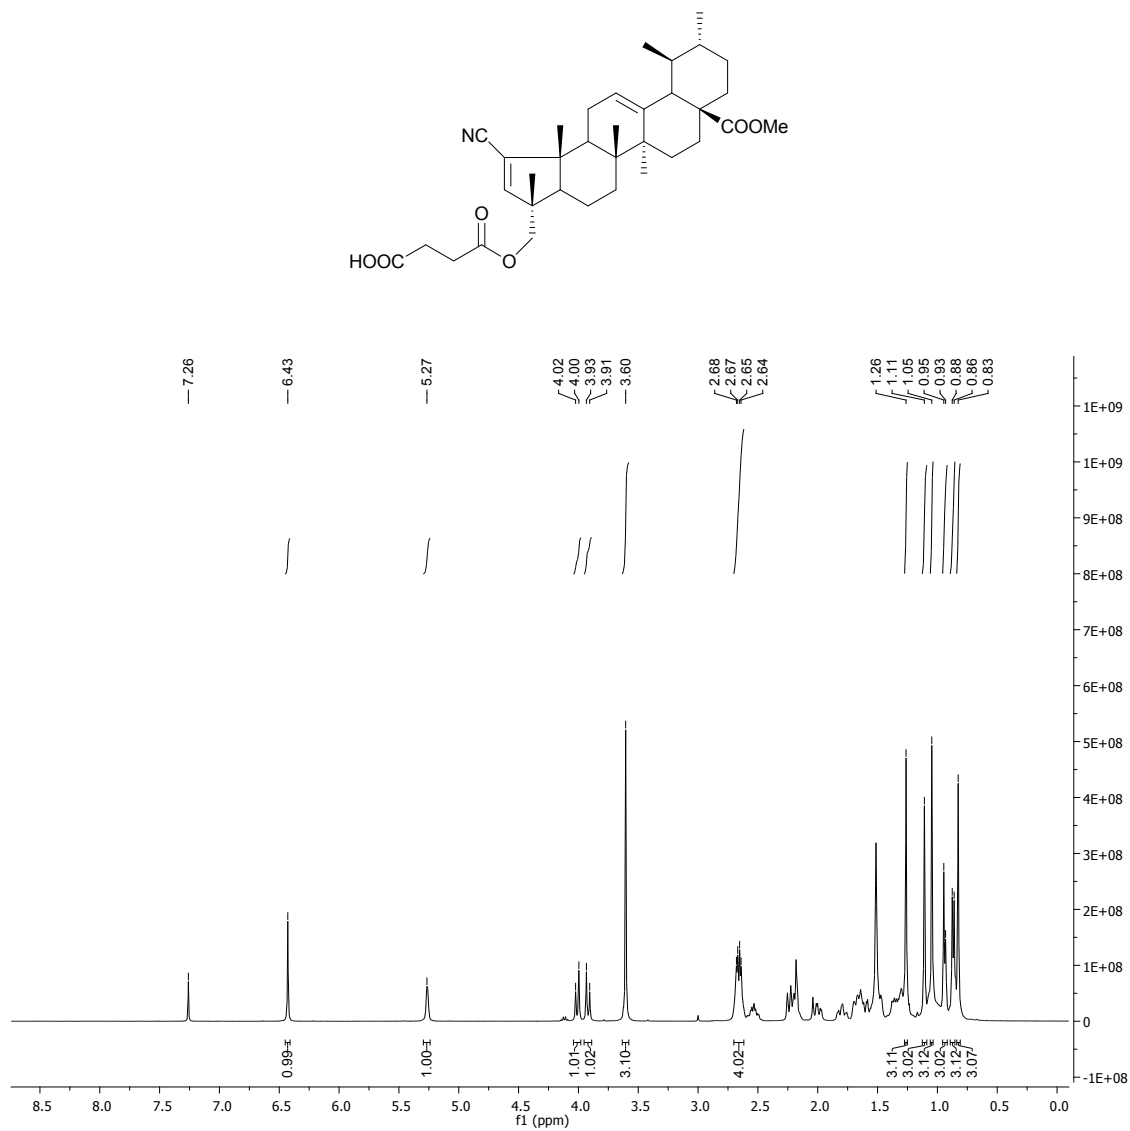

22.2  $^{13}\text{C}$ -NMR spectrum for compound 28 recorded in  $\text{CDCl}_3$

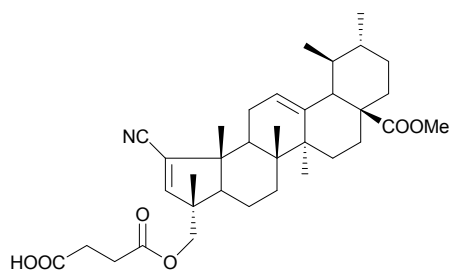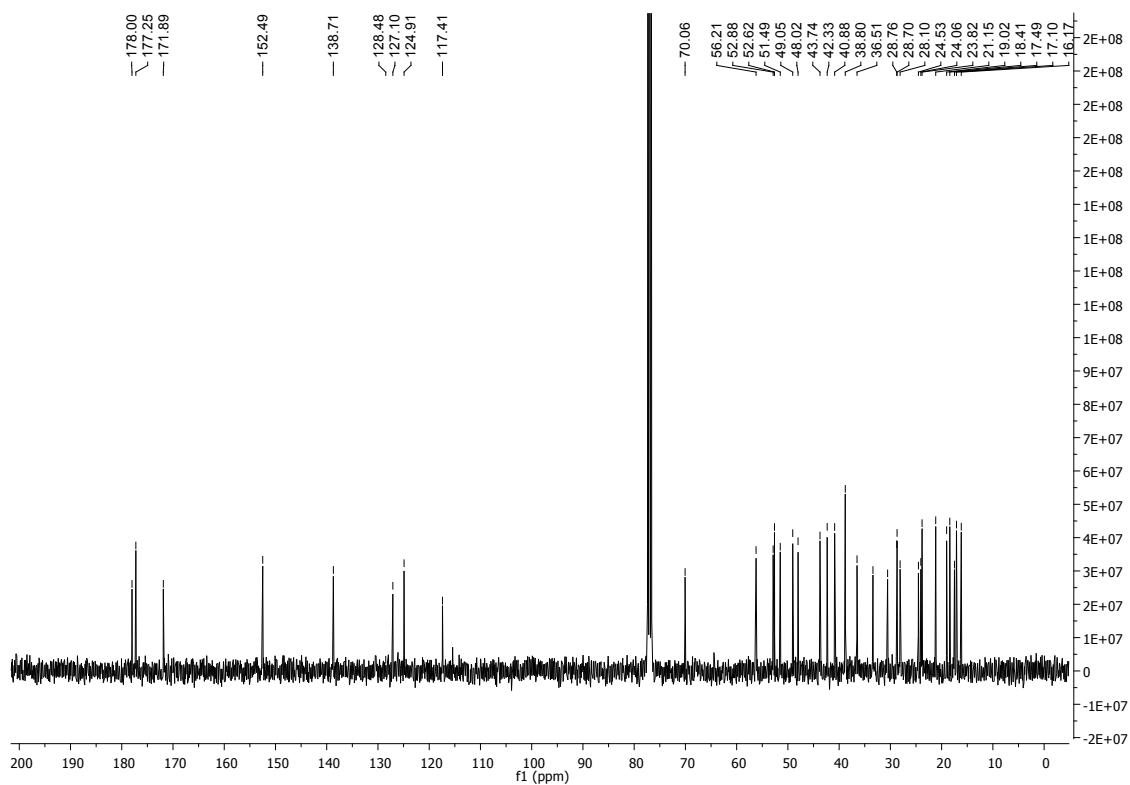

22.3 DEPT135 spectrum for compound 28 recorded in CDCl<sub>3</sub>

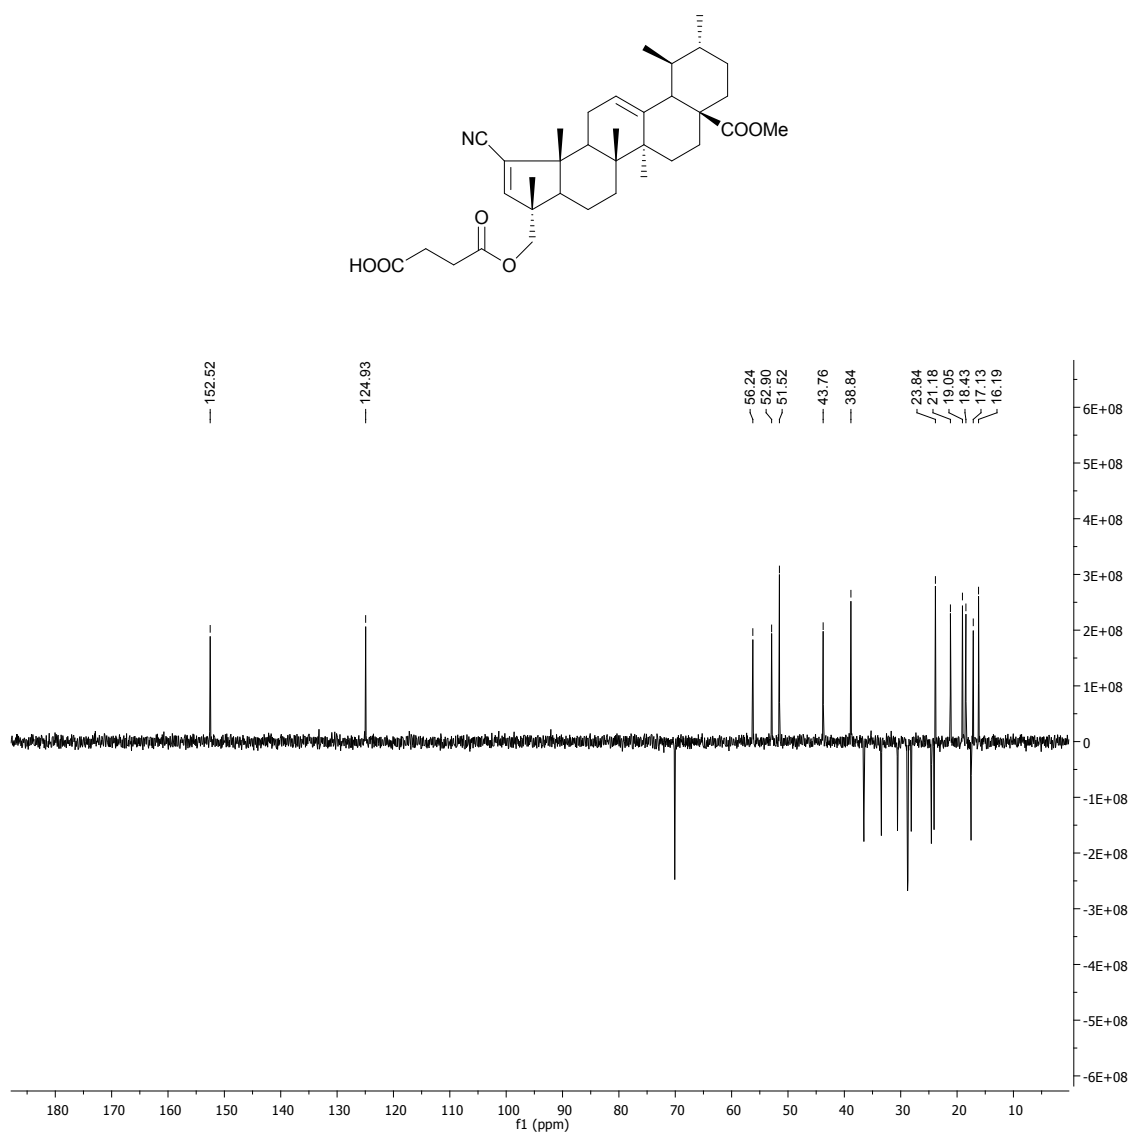

## 23. NMR data for compound 29

### 23.1 <sup>1</sup>H-NMR spectrum for compound 29 recorded in CDCl<sub>3</sub>

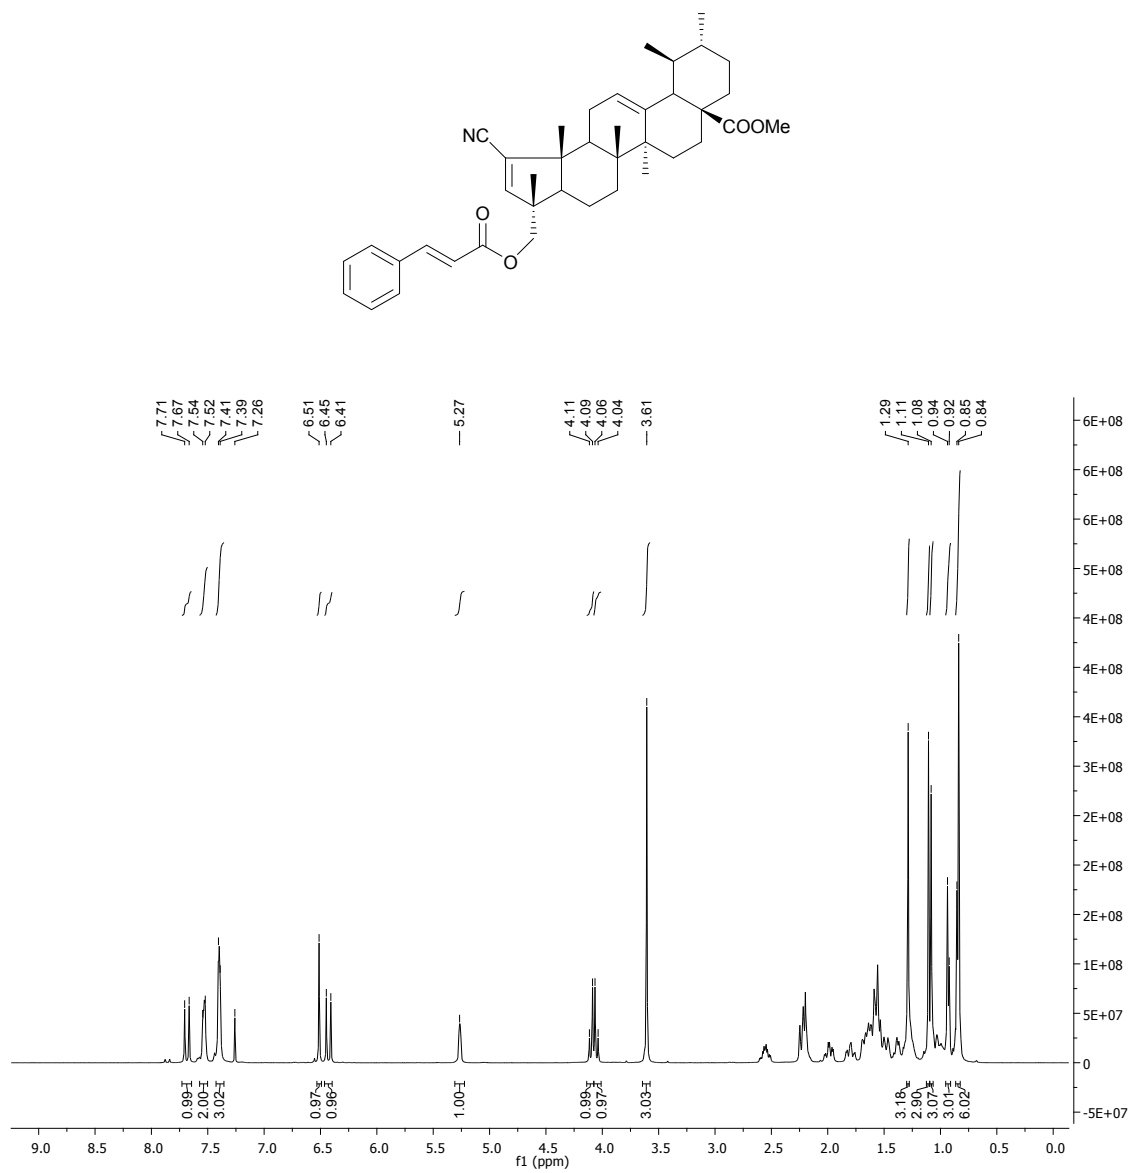



23.2  $^{13}\text{C}$ -NMR spectrum for compound 29 recorded in  $\text{CDCl}_3$

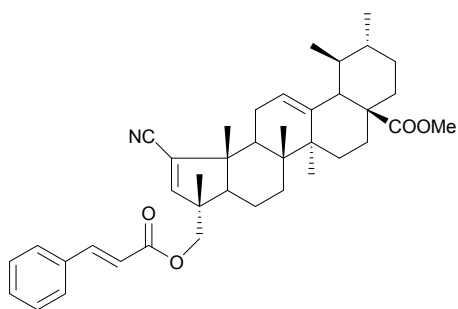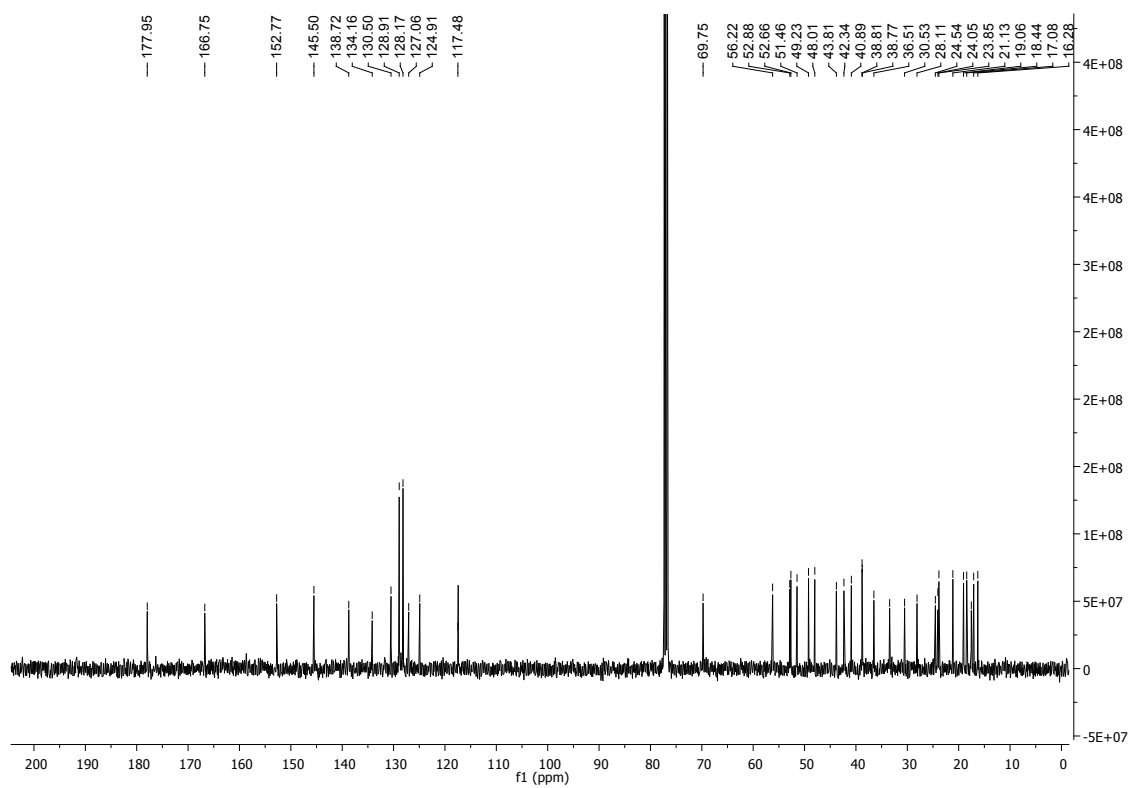

23.3 DEPT135 spectrum for compound 29 recorded in CDCl<sub>3</sub>

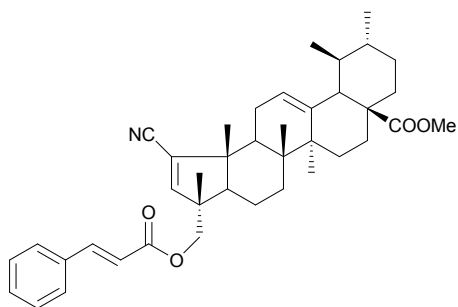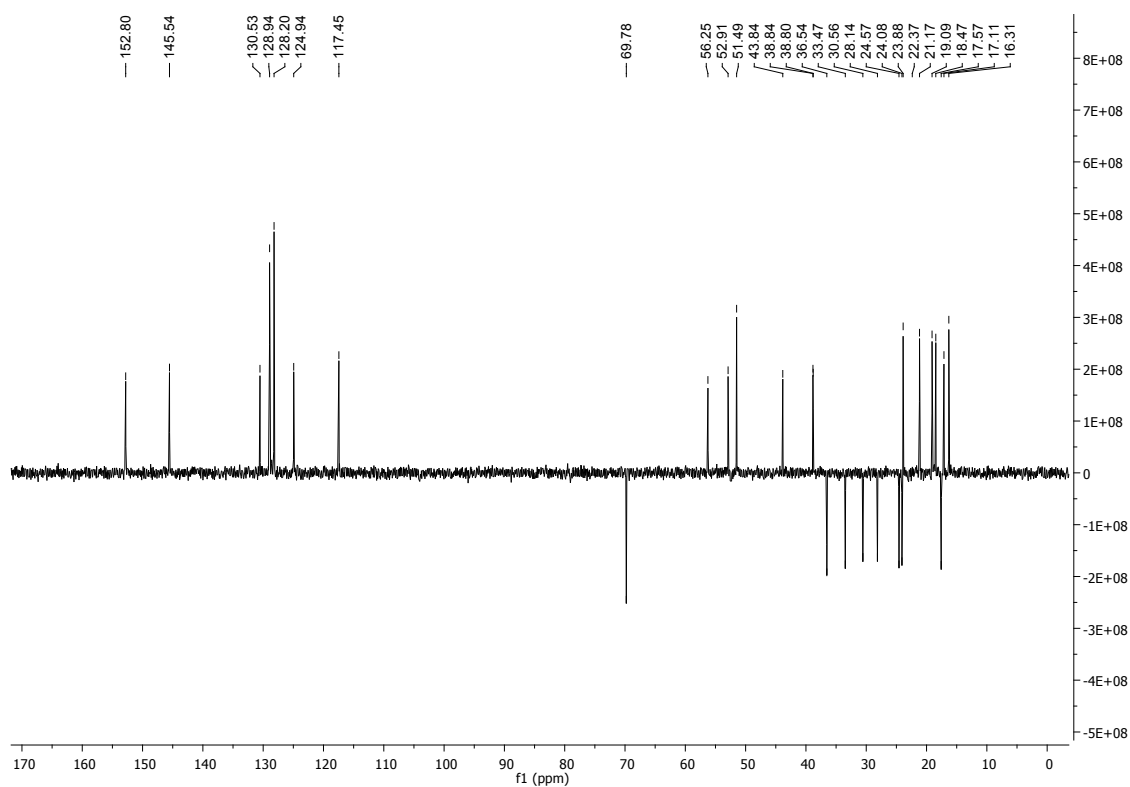

## 24. NMR data for compound 30

### 24.1 <sup>1</sup>H-NMR spectrum for compound 30 recorded in CDCl<sub>3</sub>

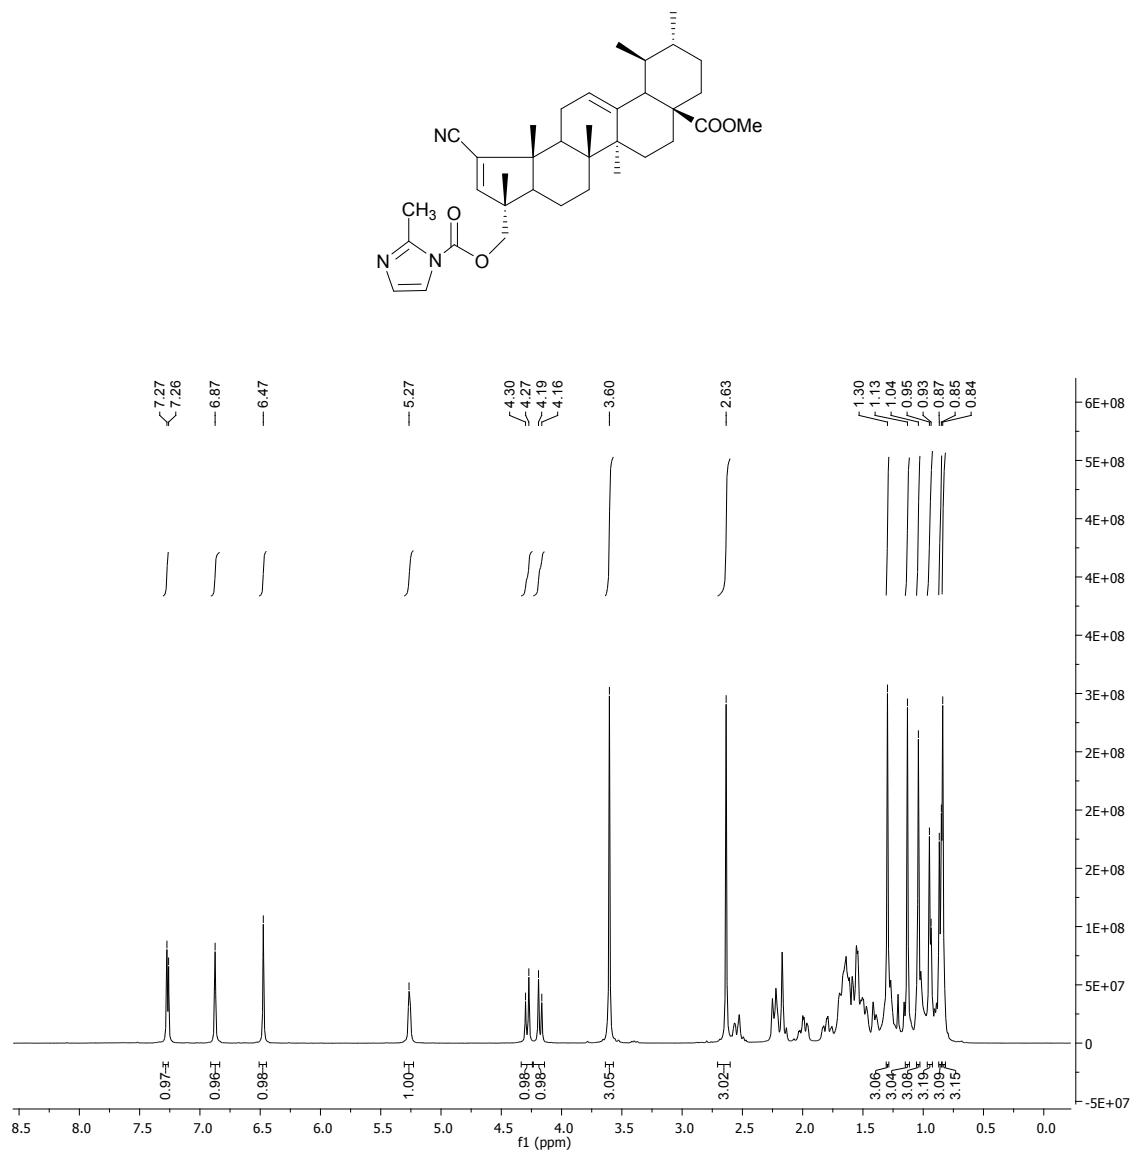

24.2  $^{13}\text{C}$ -NMR spectrum for compound 30 recorded in  $\text{CDCl}_3$

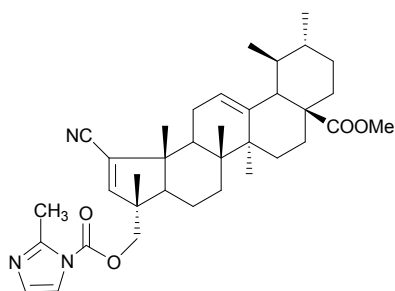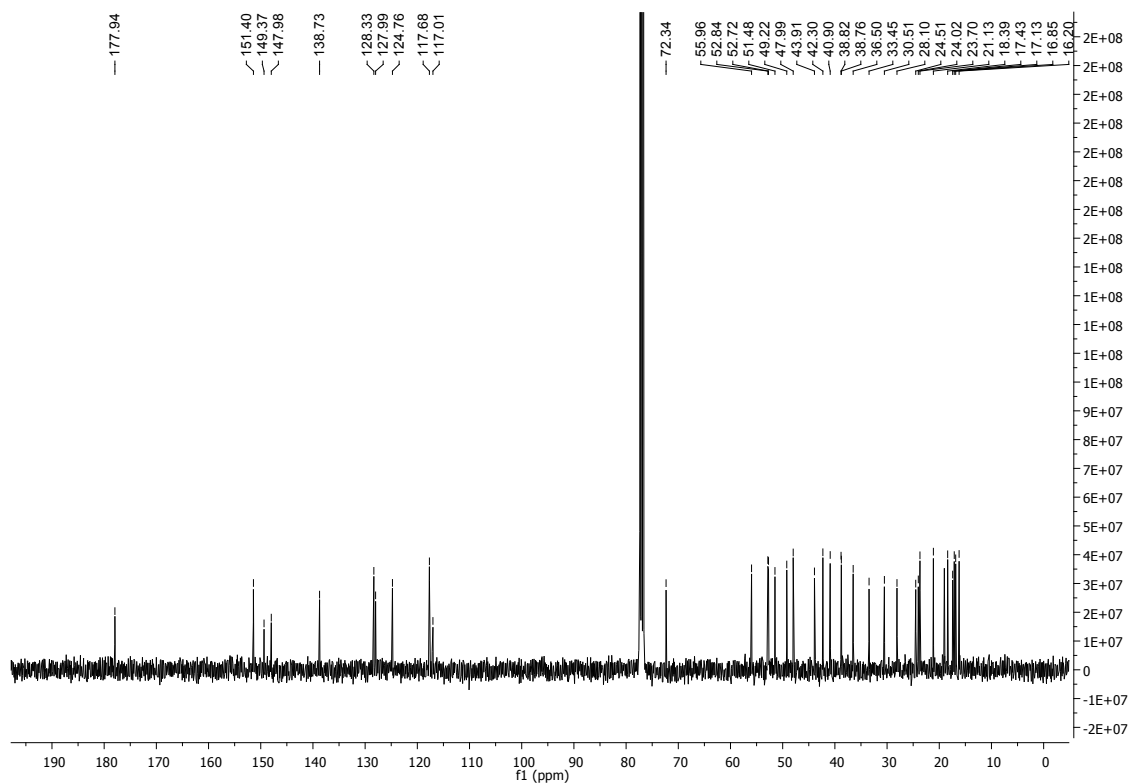

24.3 DEPT135 spectrum for compound 30 recorded in CDCl<sub>3</sub>

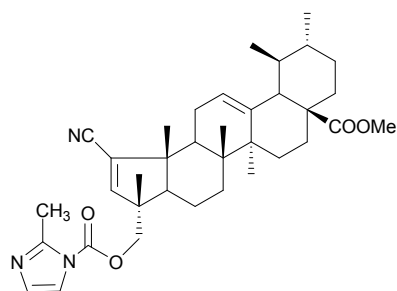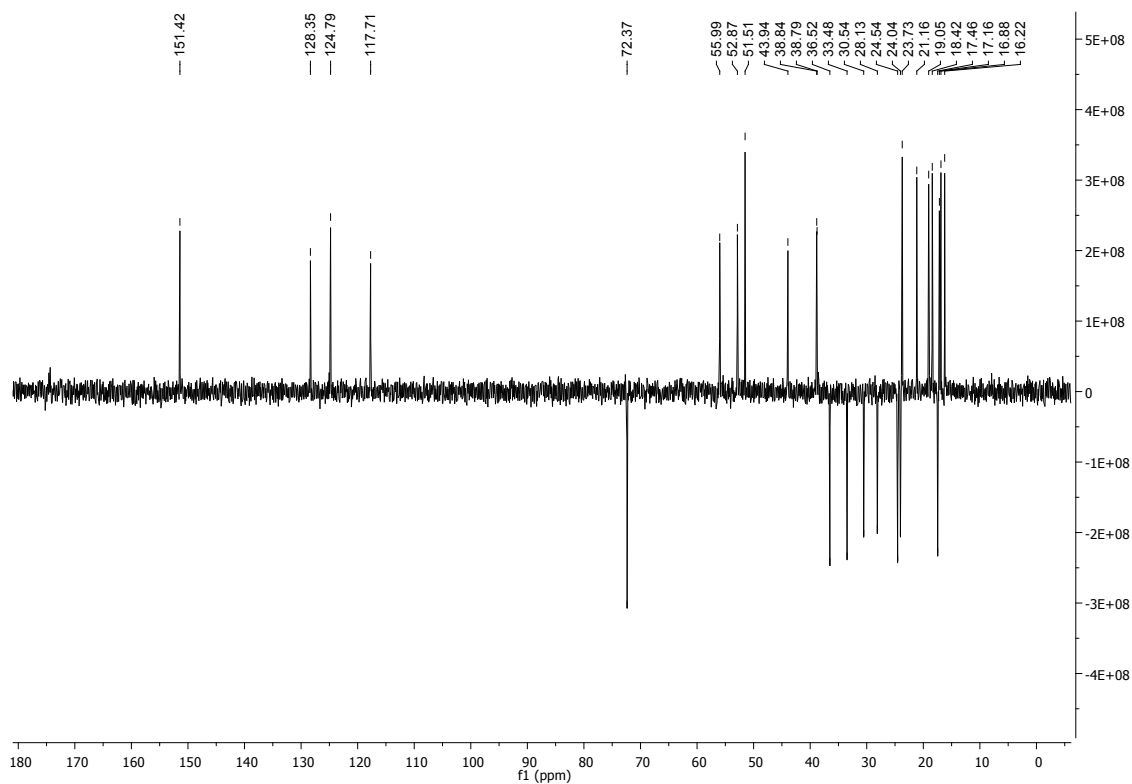

25.1 <sup>1</sup>H-NMR spectrum for compound 31 recorded in CDCl<sub>3</sub>

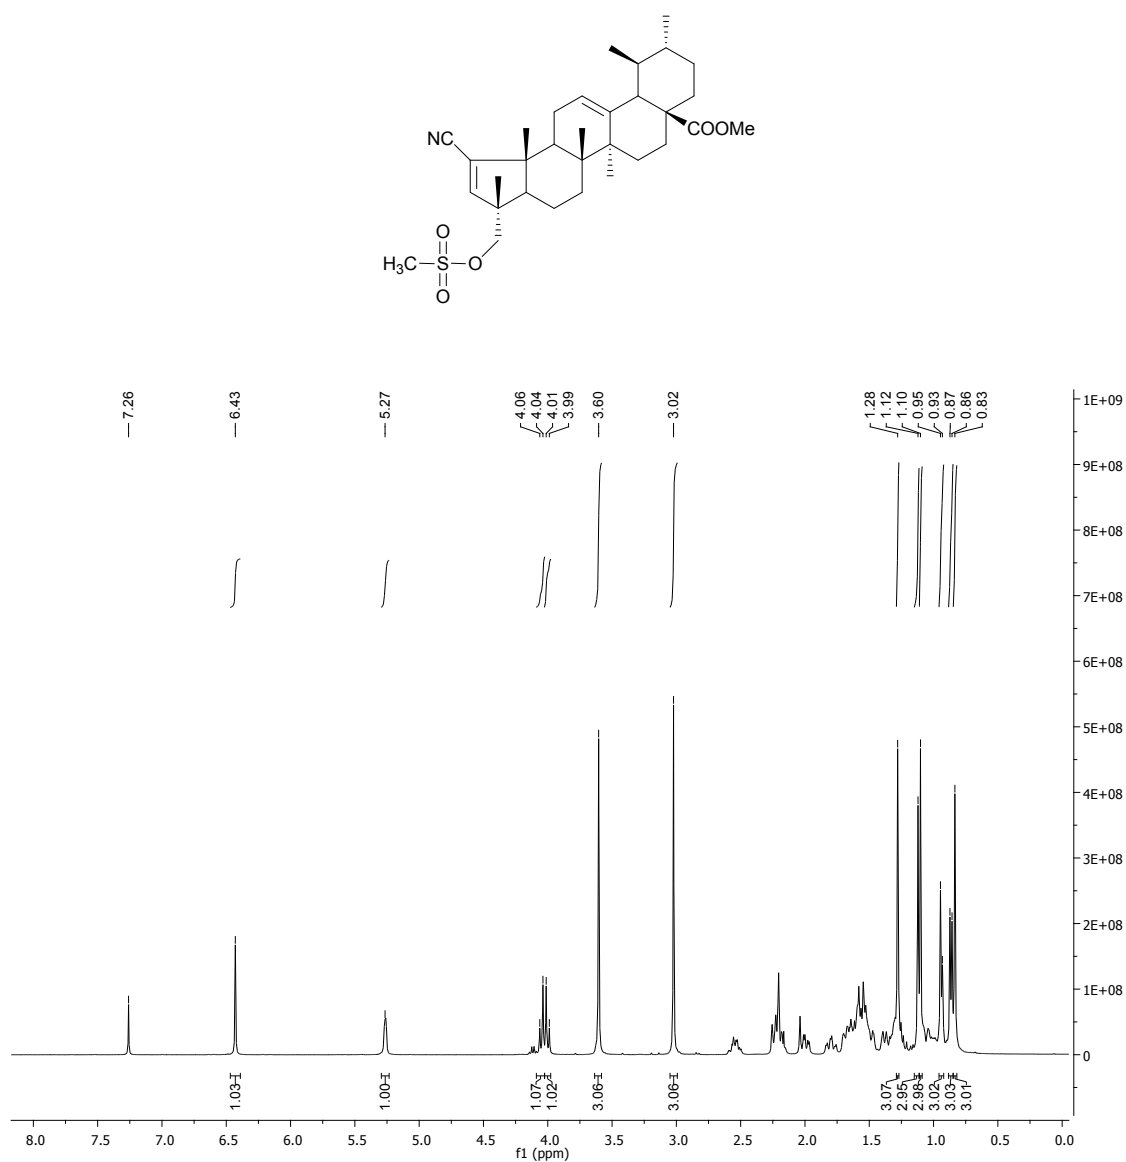

25.2  $^{13}\text{C}$ -NMR spectrum for compound 31 recorded in  $\text{CDCl}_3$

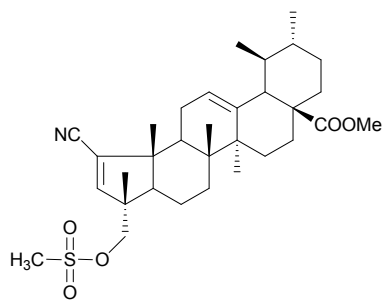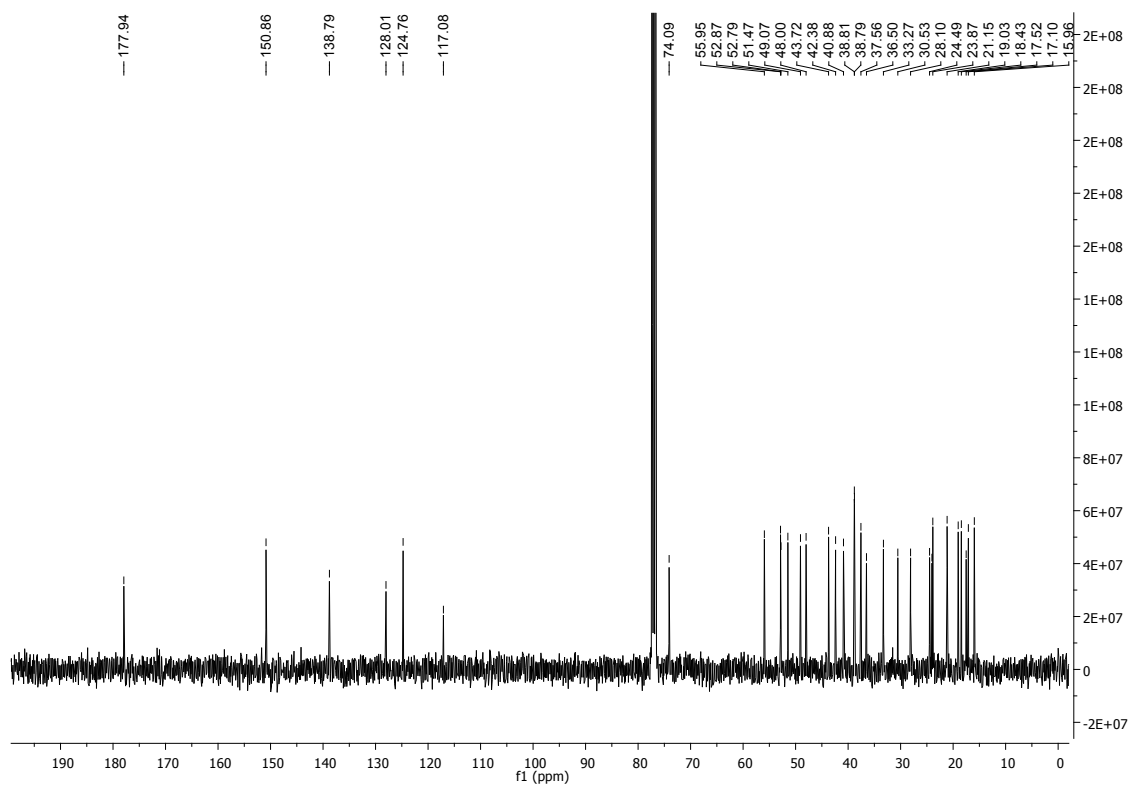

25.3 DEPT135 spectrum for compound 31 recorded in CDCl<sub>3</sub>

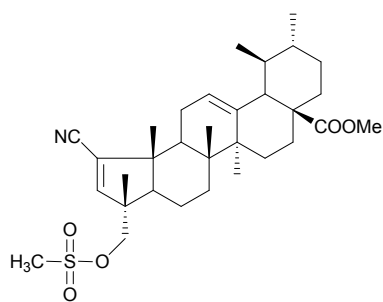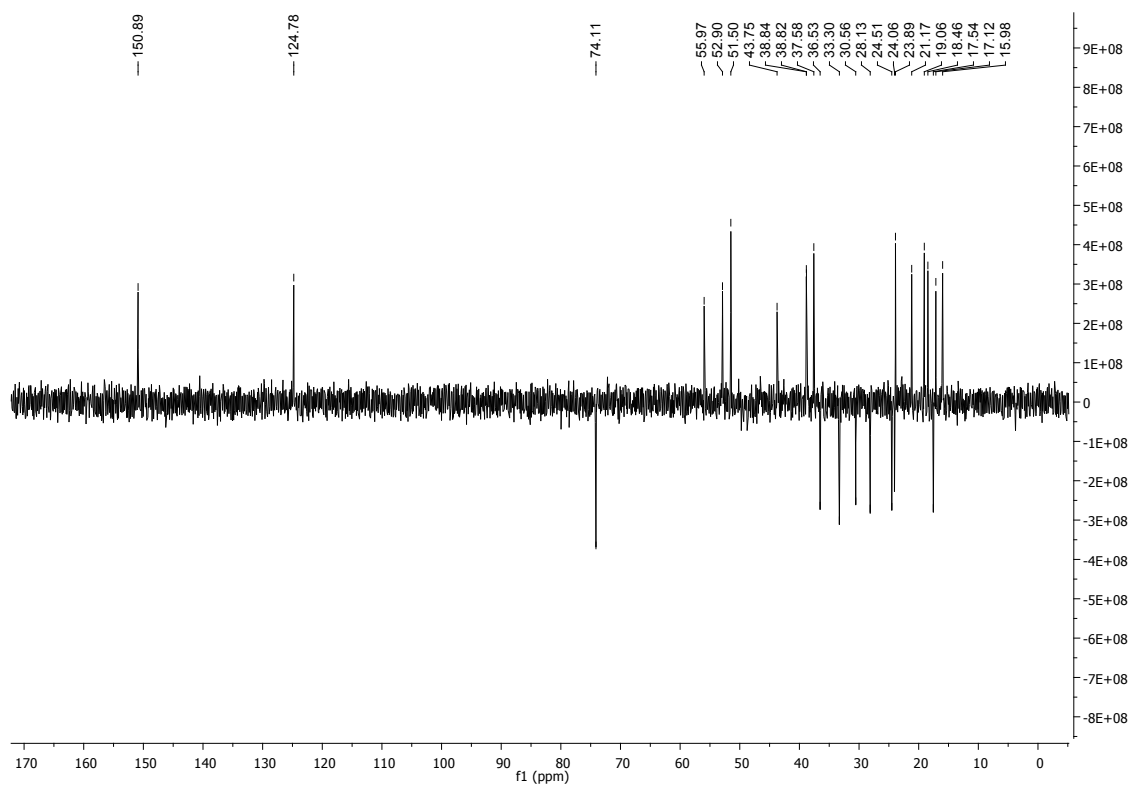



**26. Dose-response curves of the antiproliferative effect of selected compounds (AA 1, 9, 14, 15, 24 and cisplatin) on HeLa cell line, after 72 hours of incubation**

*26.1 Dose-response curve of AA (1)*

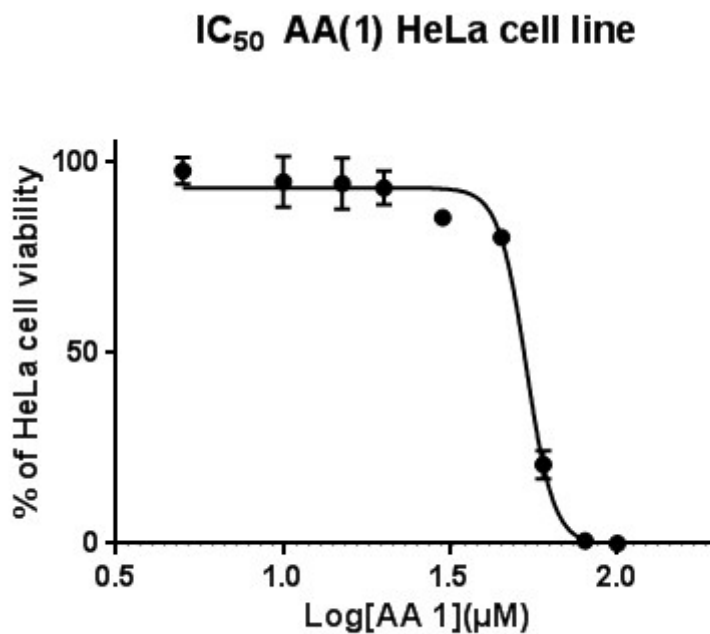

*26.2 Dose-response curve of compound 9*

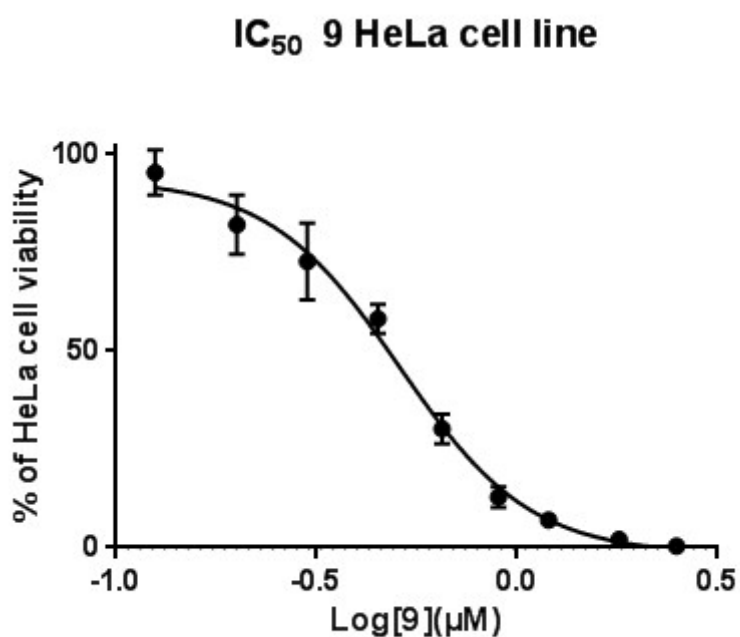

26.3 Dose-response curve of compound 14

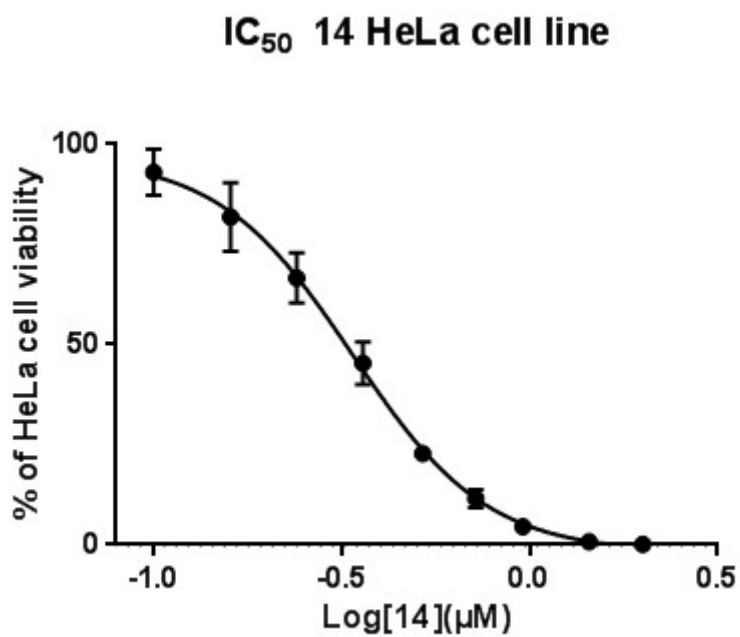

26.4 Dose-response curve of compound 15

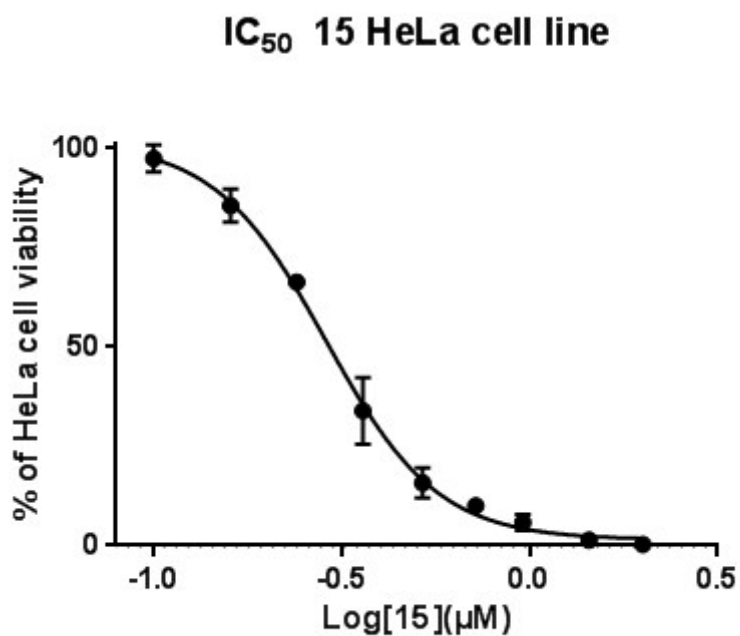

26.5 Dose-response curve of compound 24

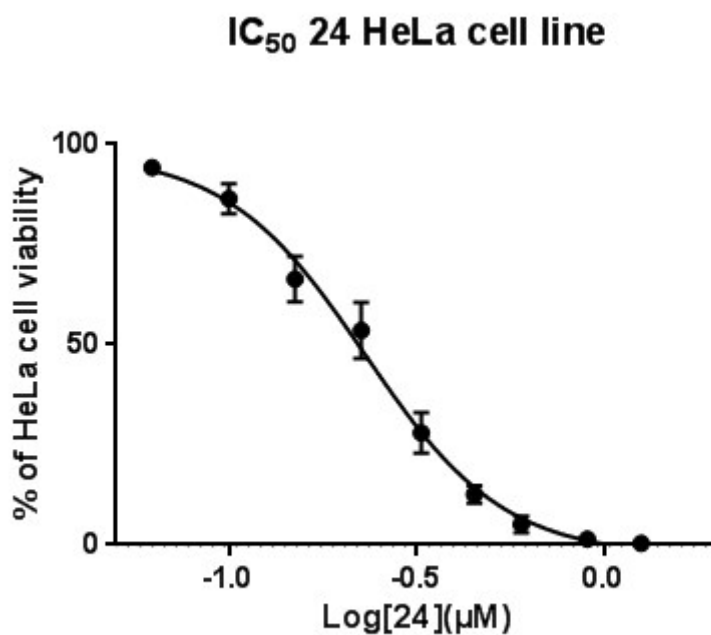

26.6 Dose-response curve of Cisplatin

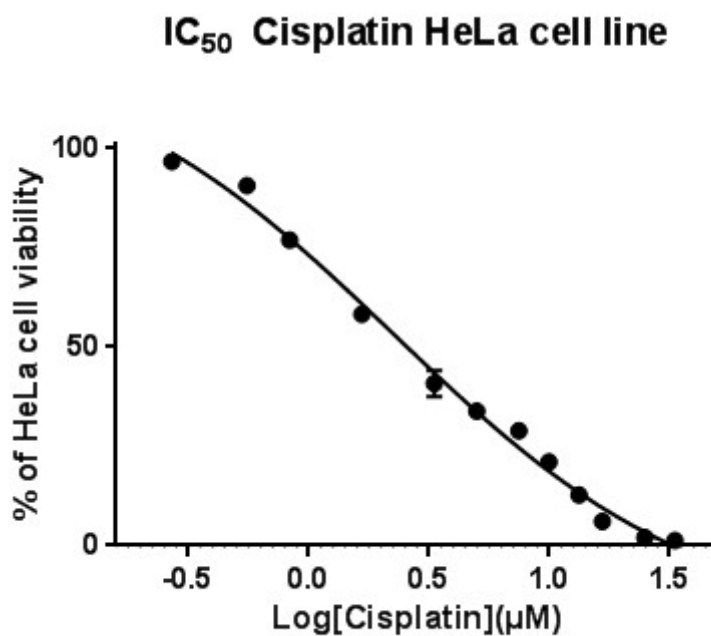

Supplement: c5ra19120c1.pdf [file c5ra19120c1.pdf]
